# Supplementary material for: Combinatorics of proanthocyanidins in wine
Source: Royal Society of Chemistry journal article supplement (doi:10.1039/c9an00439d), 2019-01-01
Supplement: c9an00439d1.csv [file c9an00439d1.csv]

				Molecule Type	Molecular Formula				Molecular Formula	Molecular	Positive Ion Type	Positive Ion Formula				Positive Ion Formula	Positive Ion	Negative Ion Type	Negative Ion Formula				Negative Ion Formula	Negative Ion
Counter	Class	Subclass	Name	M+ or M	C	H	O	S	CxHyOzSs	Mass	M+ or M+H+	C	H	O	S	CxHyOzSs	Mass	M-2H- or M-H-	C	H	O	S	CxHyOzSs	Mass
1	Proanthocyanidin Polymers	Proanthocyanidin Monomer	Proanthocyanidin Monomer 1Cat	M	15	14	6	0	C15H14O6S0	290.0790382	[M+H]+	15	15	6	0	C15H15O6S0	291.0863146	[M-H]-	15	13	6	0	C15H13O6S0	289.0717617
2	Proanthocyanidin Polymers	Proanthocyanidin Monomer	Proanthocyanidin Monomer 1Ecg	M	22	18	10	0	C22H18O10S0	442.0899968	[M+H]+	22	19	10	0	C22H19O10S0	443.0972732	[M-H]-	22	17	10	0	C22H17O10S0	441.0827203
3	Proanthocyanidin Polymers	Proanthocyanidin Monomer	Proanthocyanidin Monomer 1Egc	M	15	14	7	0	C15H14O7S0	306.0739528	[M+H]+	15	15	7	0	C15H15O7S0	307.0812292	[M-H]-	15	13	7	0	C15H13O7S0	305.0666763
4	Proanthocyanidin Polymers	Proanthocyanidin Monomer	Proanthocyanidin Monomer 1Egcg	M	22	18	11	0	C22H18O11S0	458.0849114	[M+H]+	22	19	11	0	C22H19O11S0	459.0921878	[M-H]-	22	17	11	0	C22H17O11S0	457.0776349
5	Proanthocyanidin Polymers	Proanthocyanidin Dimer	Proanthocyanidin Dimer 1Cat1Ecg	M	37	30	16	0	C37H30O16S0	730.1533849	[M+H]+	37	31	16	0	C37H31O16S0	731.1606613	[M-H]-	37	29	16	0	C37H29O16S0	729.1461084
6	Proanthocyanidin Polymers	Proanthocyanidin Dimer	Proanthocyanidin Dimer 1Cat1Egc	M	30	26	13	0	C30H26O13S0	594.1373409	[M+H]+	30	27	13	0	C30H27O13S0	595.1446173	[M-H]-	30	25	13	0	C30H25O13S0	593.1300644
7	Proanthocyanidin Polymers	Proanthocyanidin Dimer	Proanthocyanidin Dimer 1Cat1Egcg	M	37	30	17	0	C37H30O17S0	746.1482995	[M+H]+	37	31	17	0	C37H31O17S0	747.155576	[M-H]-	37	29	17	0	C37H29O17S0	745.141023
8	Proanthocyanidin Polymers	Proanthocyanidin Dimer	Proanthocyanidin Dimer 1Ecg1Egc	M	37	30	17	0	C37H30O17S0	746.1482995	[M+H]+	37	31	17	0	C37H31O17S0	747.155576	[M-H]-	37	29	17	0	C37H29O17S0	745.141023
9	Proanthocyanidin Polymers	Proanthocyanidin Dimer	Proanthocyanidin Dimer 1Ecg1Egcg	M	44	34	21	0	C44H34O21S0	898.1592581	[M+H]+	44	35	21	0	C44H35O21S0	899.1665346	[M-H]-	44	33	21	0	C44H33O21S0	897.1519817
10	Proanthocyanidin Polymers	Proanthocyanidin Dimer	Proanthocyanidin Dimer 1Egc1Egcg	M	37	30	18	0	C37H30O18S0	762.1432141	[M+H]+	37	31	18	0	C37H31O18S0	763.1504906	[M-H]-	37	29	18	0	C37H29O18S0	761.1359377
11	Proanthocyanidin Polymers	Proanthocyanidin Dimer	Proanthocyanidin Dimer 2Cat	M	30	26	12	0	C30H26O12S0	578.1424263	[M+H]+	30	27	12	0	C30H27O12S0	579.1497027	[M-H]-	30	25	12	0	C30H25O12S0	577.1351498
12	Proanthocyanidin Polymers	Proanthocyanidin Dimer	Proanthocyanidin Dimer 2Ecg	M	44	34	20	0	C44H34O20S0	882.1643435	[M+H]+	44	35	20	0	C44H35O20S0	883.1716199	[M-H]-	44	33	20	0	C44H33O20S0	881.157067
13	Proanthocyanidin Polymers	Proanthocyanidin Dimer	Proanthocyanidin Dimer 2Egc	M	30	26	14	0	C30H26O14S0	610.1322555	[M+H]+	30	27	14	0	C30H27O14S0	611.139532	[M-H]-	30	25	14	0	C30H25O14S0	609.1249791
14	Proanthocyanidin Polymers	Proanthocyanidin Dimer	Proanthocyanidin Dimer 2Egcg	M	44	34	22	0	C44H34O22S0	914.1541727	[M+H]+	44	35	22	0	C44H35O22S0	915.1614492	[M-H]-	44	33	22	0	C44H33O22S0	913.1468963
15	Proanthocyanidin Polymers	Proanthocyanidin Trimer	Proanthocyanidin Trimer 3Cat	M	45	38	18	0	C45H38O18S0	866.2058144	[M+H]+	45	39	18	0	C45H39O18S0	867.2130908	[M-H]-	45	37	18	0	C45H37O18S0	865.1985379
16	Proanthocyanidin Polymers	Proanthocyanidin Trimer	Proanthocyanidin Trimer 3Ecg	M	66	50	30	0	C66H50O30S0	1322.23869	[M+H]+	66	51	30	0	C66H51O30S0	1323.245967	[M-H]-	66	49	30	0	C66H49O30S0	1321.231414
17	Proanthocyanidin Polymers	Proanthocyanidin Trimer	Proanthocyanidin Trimer 3Egc	M	45	38	21	0	C45H38O21S0	914.1905582	[M+H]+	45	39	21	0	C45H39O21S0	915.1978347	[M-H]-	45	37	21	0	C45H37O21S0	913.1832818
18	Proanthocyanidin Polymers	Proanthocyanidin Trimer	Proanthocyanidin Trimer 3Egcg	M	66	50	33	0	C66H50O33S0	1370.223434	[M+H]+	66	51	33	0	C66H51O33S0	1371.230711	[M-H]-	66	49	33	0	C66H49O33S0	1369.216158
19	Proanthocyanidin Polymers	Proanthocyanidin Trimer	Proanthocyanidin Trimer 2Cat1Ecg	M	52	42	22	0	C52H42O22S0	1018.216773	[M+H]+	52	43	22	0	C52H43O22S0	1019.224049	[M-H]-	52	41	22	0	C52H41O22S0	1017.209497
20	Proanthocyanidin Polymers	Proanthocyanidin Trimer	Proanthocyanidin Trimer 2Cat1Egc	M	45	38	19	0	C45H38O19S0	882.200729	[M+H]+	45	39	19	0	C45H39O19S0	883.2080054	[M-H]-	45	37	19	0	C45H37O19S0	881.1934525
21	Proanthocyanidin Polymers	Proanthocyanidin Trimer	Proanthocyanidin Trimer 2Cat1Egcg	M	52	42	23	0	C52H42O23S0	1034.211688	[M+H]+	52	43	23	0	C52H43O23S0	1035.218964	[M-H]-	52	41	23	0	C52H41O23S0	1033.204411
22	Proanthocyanidin Polymers	Proanthocyanidin Trimer	Proanthocyanidin Trimer 1Cat2Ecg	M	59	46	26	0	C59H46O26S0	1170.227732	[M+H]+	59	47	26	0	C59H47O26S0	1171.235008	[M-H]-	59	45	26	0	C59H45O26S0	1169.220455
23	Proanthocyanidin Polymers	Proanthocyanidin Trimer	Proanthocyanidin Trimer 2Ecg1Egc	M	59	46	27	0	C59H46O27S0	1186.222646	[M+H]+	59	47	27	0	C59H47O27S0	1187.229923	[M-H]-	59	45	27	0	C59H45O27S0	1185.21537
24	Proanthocyanidin Polymers	Proanthocyanidin Trimer	Proanthocyanidin Trimer 2Ecg1Egcg	M	66	50	31	0	C66H50O31S0	1338.233605	[M+H]+	66	51	31	0	C66H51O31S0	1339.240881	[M-H]-	66	49	31	0	C66H49O31S0	1337.226328
25	Proanthocyanidin Polymers	Proanthocyanidin Trimer	Proanthocyanidin Trimer 1Cat2Egc	M	45	38	20	0	C45H38O20S0	898.1956436	[M+H]+	45	39	20	0	C45H39O20S0	899.2029201	[M-H]-	45	37	20	0	C45H37O20S0	897.1883672
26	Proanthocyanidin Polymers	Proanthocyanidin Trimer	Proanthocyanidin Trimer 1Ecg2Egc	M	52	42	24	0	C52H42O24S0	1050.206602	[M+H]+	52	43	24	0	C52H43O24S0	1051.213879	[M-H]-	52	41	24	0	C52H41O24S0	1049.199326
27	Proanthocyanidin Polymers	Proanthocyanidin Trimer	Proanthocyanidin Trimer 2Egc1Egcg	M	52	42	25	0	C52H42O25S0	1066.201517	[M+H]+	52	43	25	0	C52H43O25S0	1067.208793	[M-H]-	52	41	25	0	C52H41O25S0	1065.19424
28	Proanthocyanidin Polymers	Proanthocyanidin Trimer	Proanthocyanidin Trimer 1Cat2Egcg	M	59	46	28	0	C59H46O28S0	1202.217561	[M+H]+	59	47	28	0	C59H47O28S0	1203.224837	[M-H]-	59	45	28	0	C59H45O28S0	1201.210284
29	Proanthocyanidin Polymers	Proanthocyanidin Trimer	Proanthocyanidin Trimer 1Ecg2Egcg	M	66	50	32	0	C66H50O32S0	1354.228519	[M+H]+	66	51	32	0	C66H51O32S0	1355.235796	[M-H]-	66	49	32	0	C66H49O32S0	1353.221243
30	Proanthocyanidin Polymers	Proanthocyanidin Trimer	Proanthocyanidin Trimer 1Egc2Egcg	M	59	46	29	0	C59H46O29S0	1218.212475	[M+H]+	59	47	29	0	C59H47O29S0	1219.219752	[M-H]-	59	45	29	0	C59H45O29S0	1217.205199
31	Proanthocyanidin Polymers	Proanthocyanidin Trimer	Proanthocyanidin Trimer 1Ecg1Egc1Egcg	M	59	46	28	0	C59H46O28S0	1202.217561	[M+H]+	59	47	28	0	C59H47O28S0	1203.224837	[M-H]-	59	45	28	0	C59H45O28S0	1201.210284
32	Proanthocyanidin Polymers	Proanthocyanidin Trimer	Proanthocyanidin Trimer 1Cat1Egc1Egcg	M	52	42	24	0	C52H42O24S0	1050.206602	[M+H]+	52	43	24	0	C52H43O24S0	1051.213879	[M-H]-	52	41	24	0	C52H41O24S0	1049.199326
33	Proanthocyanidin Polymers	Proanthocyanidin Trimer	Proanthocyanidin Trimer 1Cat1Ecg1Egcg	M	59	46	27	0	C59H46O27S0	1186.222646	[M+H]+	59	47	27	0	C59H47O27S0	1187.229923	[M-H]-	59	45	27	0	C59H45O27S0	1185.21537
34	Proanthocyanidin Polymers	Proanthocyanidin Trimer	Proanthocyanidin Trimer 1Cat1Ecg1Egc	M	52	42	23	0	C52H42O23S0	1034.211688	[M+H]+	52	43	23	0	C52H43O23S0	1035.218964	[M-H]-	52	41	23	0	C52H41O23S0	1033.204411
35	Proanthocyanidin Polymers	Proanthocyanidin Tetramer	Proanthocyanidin Tetramer 4Cat	M	60	50	24	0	C60H50O24S0	1154.269202	[M+H]+	60	51	24	0	C60H51O24S0	1155.276479	[M-H]-	60	49	24	0	C60H49O24S0	1153.261926
36	Proanthocyanidin Polymers	Proanthocyanidin Tetramer	Proanthocyanidin Tetramer 4Ecg	M	88	66	40	0	C88H66O40S0	1762.313037	[M+H]+	88	67	40	0	C88H67O40S0	1763.320313	[M-H]-	88	65	40	0	C88H65O40S0	1761.30576
37	Proanthocyanidin Polymers	Proanthocyanidin Tetramer	Proanthocyanidin Tetramer 4Egc	M	60	50	28	0	C60H50O28S0	1218.248861	[M+H]+	60	51	28	0	C60H51O28S0	1219.256137	[M-H]-	60	49	28	0	C60H49O28S0	1217.241585
38	Proanthocyanidin Polymers	Proanthocyanidin Tetramer	Proanthocyanidin Tetramer 4Egcg	M	88	66	44	0	C88H66O44S0	1826.292695	[M+H]+	88	67	44	0	C88H67O44S0	1827.299972	[M-H]-	88	65	44	0	C88H65O44S0	1825.285419
39	Proanthocyanidin Polymers	Proanthocyanidin Tetramer	Proanthocyanidin Tetramer 3Cat1Ecg	M	67	54	28	0	C67H54O28S0	1306.280161	[M+H]+	67	55	28	0	C67H55O28S0	1307.287438	[M-H]-	67	53	28	0	C67H53O28S0	1305.272885
40	Proanthocyanidin Polymers	Proanthocyanidin Tetramer	Proanthocyanidin Tetramer 3Cat1Egc	M	60	50	25	0	C60H50O25S0	1170.264117	[M+H]+	60	51	25	0	C60H51O25S0	1171.271394	[M-H]-	60	49	25	0	C60H49O25S0	1169.256841
41	Proanthocyanidin Polymers	Proanthocyanidin Tetramer	Proanthocyanidin Tetramer 3Cat1Egcg	M	67	54	29	0	C67H54O29S0	1322.275076	[M+H]+	67	55	29	0	C67H55O29S0	1323.282352	[M-H]-	67	53	29	0	C67H53O29S0	1321.267799
42	Proanthocyanidin Polymers	Proanthocyanidin Tetramer	Proanthocyanidin Tetramer 1Cat3Ecg	M	81	62	36	0	C81H62O36S0	1610.302078	[M+H]+	81	63	36	0	C81H63O36S0	1611.309355	[M-H]-	81	61	36	0	C81H61O36S0	1609.294802
43	Proanthocyanidin Polymers	Proanthocyanidin Tetramer	Proanthocyanidin Tetramer 3Ecg1Egc	M	81	62	37	0	C81H62O37S0	1626.296993	[M+H]+	81	63	37	0	C81H63O37S0	1627.304269	[M-H]-	81	61	37	0	C81H61O37S0	1625.289716
44	Proanthocyanidin Polymers	Proanthocyanidin Tetramer	Proanthocyanidin Tetramer 3Ecg1Egcg	M	88	66	41	0	C88H66O41S0	1778.307952	[M+H]+	88	67	41	0	C88H67O41S0	1779.315228	[M-H]-	88	65	41	0	C88H65O41S0	1777.300675
45	Proanthocyanidin Polymers	Proanthocyanidin Tetramer	Proanthocyanidin Tetramer 1Cat3Egc	M	60	50	27	0	C60H50O27S0	1202.253946	[M+H]+	60	51	27	0	C60H51O27S0	1203.261223	[M-H]-	60	49	27	0	C60H49O27S0	1201.24667
46	Proanthocyanidin Polymers	Proanthocyanidin Tetramer	Proanthocyanidin Tetramer 1Ecg3Egc	M	67	54	31	0	C67H54O31S0	1354.264905	[M+H]+	67	55	31	0	C67H55O31S0	1355.272181	[M-H]-	67	53	31	0	C67H53O31S0	1353.257628
47	Proanthocyanidin Polymers	Proanthocyanidin Tetramer	Proanthocyanidin Tetramer 3Egc1Egcg	M	67	54	32	0	C67H54O32S0	1370.25982	[M+H]+	67	55	32	0	C67H55O32S0	1371.267096	[M-H]-	67	53	32	0	C67H53O32S0	1369.252543
48	Proanthocyanidin Polymers	Proanthocyanidin Tetramer	Proanthocyanidin Tetramer 1Cat3Egcg	M	81	62	39	0	C81H62O39S0	1658.286822	[M+H]+	81	63	39	0	C81H63O39S0	1659.294099	[M-H]-	81	61	39	0	C81H61O39S0	1657.279546
49	Proanthocyanidin Polymers	Proanthocyanidin Tetramer	Proanthocyanidin Tetramer 1Ecg3Egcg	M	88	66	43	0	C88H66O43S0	1810.297781	[M+H]+	88	67	43	0	C88H67O43S0	1811.305057	[M-H]-	88	65	43	0	C88H65O43S0	1809.290504
50	Proanthocyanidin Polymers	Proanthocyanidin Tetramer	Proanthocyanidin Tetramer 1Egc3Egcg	M	81	62	40	0	C81H62O40S0	1674.281737	[M+H]+	81	63	40	0	C81H63O40S0	1675.289013	[M-H]-	81	61	40	0	C81H61O40S0	1673.27446
51	Proanthocyanidin Polymers	Proanthocyanidin Tetramer	Proanthocyanidin Tetramer 2Cat2Ecg	M	74	58	32	0	C74H58O32S0	1458.29112	[M+H]+	74	59	32	0	C74H59O32S0	1459.298396	[M-H]-	74	57	32	0	C74H57O32S0	1457.283843
52	Proanthocyanidin Polymers	Proanthocyanidin Tetramer	Proanthocyanidin Tetramer 2Cat2Egc	M	60	50	26	0	C60H50O26S0	1186.259032	[M+H]+	60	51	26	0	C60H51O26S0	1187.266308	[M-H]-	60	49	26	0	C60H49O26S0	1185.251755
53	Proanthocyanidin Polymers	Proanthocyanidin Tetramer	Proanthocyanidin Tetramer 2Cat2Egcg	M	74	58	34	0	C74H58O34S0	1490.280949	[M+H]+	74	59	34	0	C74H59O34S0	1491.288225	[M-H]-	74	57	34	0	C74H57O34S0	1489.273672
54	Proanthocyanidin Polymers	Proanthocyanidin Tetramer	Proanthocyanidin Tetramer 2Ecg2Egc	M	74	58	34	0	C74H58O34S0	1490.280949	[M+H]+	74	59	34	0	C74H59O34S0	1491.288225	[M-H]-	74	57	34	0	C74H57O34S0	1489.273672
55	Proanthocyanidin Polymers	Proanthocyanidin Tetramer	Proanthocyanidin Tetramer 2Ecg2Egcg	M	88	66	42	0	C88H66O42S0	1794.302866	[M+H]+	88	67	42	0	C88H67O42S0	1795.310143	[M-H]-	88	65	42	0	C88H65O42S0	1793.29559
56	Proanthocyanidin Polymers	Proanthocyanidin Tetramer	Proanthocyanidin Tetramer 2Egc2Egcg	M	74	58	36	0	C74H58O36S0	1522.270778	[M+H]+	74	59	36	0	C74H59O36S0	1523.278055	[M-H]-	74	57	36	0	C74H57O36S0	1521.263502
57	Proanthocyanidin Polymers	Proanthocyanidin Tetramer	Proanthocyanidin Tetramer 2Cat1Ecg1Egc	M	67	54	29	0	C67H54O29S0	1322.275076	[M+H]+	67	55	29	0	C67H55O29S0	1323.282352	[M-H]-	67	53	29	0	C67H53O29S0	1321.267799
58	Proanthocyanidin Polymers	Proanthocyanidin Tetramer	Proanthocyanidin Tetramer 2Cat1Ecg1Egcg	M	74	58	33	0	C74H58O33S0	1474.286034	[M+H]+	74	59	33	0	C74H59O33S0	1475.293311	[M-H]-	74	57	33	0	C74H57O33S0	1473.278758
59	Proanthocyanidin Polymers	Proanthocyanidin Tetramer	Proanthocyanidin Tetramer 2Cat1Egc1Egcg	M	67	54	30	0	C67H54O30S0	1338.26999	[M+H]+	67	55	30	0	C67H55O30S0	1339.277267	[M-H]-	67	53	30	0	C67H53O30S0	1337.262714
60	Proanthocyanidin Polymers	Proanthocyanidin Tetramer	Proanthocyanidin Tetramer 1Cat2Ecg1Egc	M	74	58	33	0	C74H58O33S0	1474.286034	[M+H]+	74	59	33	0	C74H59O33S0	1475.293311	[M-H]-	74	57	33	0	C74H57O33S0	1473.278758
61	Proanthocyanidin Polymers	Proanthocyanidin Tetramer	Proanthocyanidin Tetramer 1Cat2Ecg1Egcg	M	81	62	37	0	C81H62O37S0	1626.296993	[M+H]+	81	63	37	0	C81H63O37S0	1627.304269	[M-H]-	81	61	37	0	C81H61O37S0	1625.289716
62	Proanthocyanidin Polymers	Proanthocyanidin Tetramer	Proanthocyanidin Tetramer 2Ecg1Egc1Egcg	M	81	62	38	0	C81H62O38S0	1642.291908	[M+H]+	81	63	38	0	C81H63O38S0	1643.299184	[M-H]-	81	61	38	0	C81H61O38S0	1641.284631
63	Proanthocyanidin Polymers	Proanthocyanidin Tetramer	Proanthocyanidin Tetramer 1Cat1Ecg2Egc	M	67	54	30	0	C67H54O30S0	1338.26999	[M+H]+	67	55	30	0	C67H55O30S0	1339.277267	[M-H]-	67	53	30	0	C67H53O30S0	1337.262714
64	Proanthocyanidin Polymers	Proanthocyanidin Tetramer	Proanthocyanidin Tetramer 1Cat2Egc1Egcg	M	67	54	31	0	C67H54O31S0	1354.264905	[M+H]+	67	55	31	0	C67H55O31S0	1355.272181	[M-H]-	67	53	31	0	C67H53O31S0	1353.257628
65	Proanthocyanidin Polymers	Proanthocyanidin Tetramer	Proanthocyanidin Tetramer 1Ecg2Egc1Egcg	M	74	58	35	0	C74H58O35S0	1506.275864	[M+H]+	74	59	35	0	C74H59O35S0	1507.28314	[M-H]-	74	57	35	0	C74H57O35S0	1505.268587
66	Proanthocyanidin Polymers	Proanthocyanidin Tetramer	Proanthocyanidin Tetramer 1Cat1Ecg2Egcg	M	81	62	38	0	C81H62O38S0	1642.291908	[M+H]+	81	63	38	0	C81H63O38S0	1643.299184	[M-H]-	81	61	38	0	C81H61O38S0	1641.284631
67	Proanthocyanidin Polymers	Proanthocyanidin Tetramer	Proanthocyanidin Tetramer 1Cat1Egc2Egcg	M	74	58	35	0	C74H58O35S0	1506.275864	[M+H]+	74	59	35	0	C74H59O35S0	1507.28314	[M-H]-	74	57	35	0	C74H57O35S0	1505.268587
68	Proanthocyanidin Polymers	Proanthocyanidin Tetramer	Proanthocyanidin Tetramer 1Ecg1Egc2Egcg	M	81	62	39	0	C81H62O39S0	1658.286822	[M+H]+	81	63	39	0	C81H63O39S0	1659.294099	[M-H]-	81	61	39	0	C81H61O39S0	1657.279546
69	Proanthocyanidin Polymers	Proanthocyanidin Tetramer	Proanthocyanidin Tetramer 1Cat1Ecg1Egc1Egcg	M	74	58	34	0	C74H58O34S0	1490.280949	[M+H]+	74	59	34	0	C74H59O34S0	1491.288225	[M-H]-	74	57	34	0	C74H57O34S0	1489.273672
70	Proanthocyanidin Polymers	Proanthocyanidin Pentamer	Proanthocyanidin Pentamer 5Cat	M	75	62	30	0	C75H62O30S0	1442.332591	[M+H]+	75	63	30	0	C75H63O30S0	1443.339867	[M-H]-	75	61	30	0	C75H61O30S0	1441.325314
71	Proanthocyanidin Polymers	Proanthocyanidin Pentamer	Proanthocyanidin Pentamer 5Ecg	M	110	82	50	0	C110H82O50S0	2202.387384	[M+H]+	110	83	50	0	C110H83O50S0	2203.39466	[M-H]-	110	81	50	0	C110H81O50S0	2201.380107
72	Proanthocyanidin Polymers	Proanthocyanidin Pentamer	Proanthocyanidin Pentamer 5Egc	M	75	62	35	0	C75H62O35S0	1522.307164	[M+H]+	75	63	35	0	C75H63O35S0	1523.31444	[M-H]-	75	61	35	0	C75H61O35S0	1521.299887
73	Proanthocyanidin Polymers	Proanthocyanidin Pentamer	Proanthocyanidin Pentamer 5Egcg	M	110	82	55	0	C110H82O55S0	2282.361957	[M+H]+	110	83	55	0	C110H83O55S0	2283.369233	[M-H]-	110	81	55	0	C110H81O55S0	2281.35468
74	Proanthocyanidin Polymers	Proanthocyanidin Pentamer	Proanthocyanidin Pentamer 4Cat1Ecg	M	82	66	34	0	C82H66O34S0	1594.343549	[M+H]+	82	67	34	0	C82H67O34S0	1595.350826	[M-H]-	82	65	34	0	C82H65O34S0	1593.336273
75	Proanthocyanidin Polymers	Proanthocyanidin Pentamer	Proanthocyanidin Pentamer 4Cat1Egc	M	75	62	31	0	C75H62O31S0	1458.327505	[M+H]+	75	63	31	0	C75H63O31S0	1459.334782	[M-H]-	75	61	31	0	C75H61O31S0	1457.320229
76	Proanthocyanidin Polymers	Proanthocyanidin Pentamer	Proanthocyanidin Pentamer 4Cat1Egcg	M	82	66	35	0	C82H66O35S0	1610.338464	[M+H]+	82	67	35	0	C82H67O35S0	1611.34574	[M-H]-	82	65	35	0	C82H65O35S0	1609.331187
77	Proanthocyanidin Polymers	Proanthocyanidin Pentamer	Proanthocyanidin Pentamer 1Cat4Ecg	M	103	78	46	0	C103H78O46S0	2050.376425	[M+H]+	103	79	46	0	C103H79O46S0	2051.383701	[M-H]-	103	77	46	0	C103H77O46S0	2049.369149
78	Proanthocyanidin Polymers	Proanthocyanidin Pentamer	Proanthocyanidin Pentamer 4Ecg1Egc	M	103	78	47	0	C103H78O47S0	2066.37134	[M+H]+	103	79	47	0	C103H79O47S0	2067.378616	[M-H]-	103	77	47	0	C103H77O47S0	2065.364063
79	Proanthocyanidin Polymers	Proanthocyanidin Pentamer	Proanthocyanidin Pentamer 4Ecg1Egcg	M	110	82	51	0	C110H82O51S0	2218.382298	[M+H]+	110	83	51	0	C110H83O51S0	2219.389575	[M-H]-	110	81	51	0	C110H81O51S0	2217.375022
80	Proanthocyanidin Polymers	Proanthocyanidin Pentamer	Proanthocyanidin Pentamer 1Cat4Egc	M	75	62	34	0	C75H62O34S0	1506.312249	[M+H]+	75	63	34	0	C75H63O34S0	1507.319526	[M-H]-	75	61	34	0	C75H61O34S0	1505.304973
81	Proanthocyanidin Polymers	Proanthocyanidin Pentamer	Proanthocyanidin Pentamer 1Ecg4Egc	M	82	66	38	0	C82H66O38S0	1658.323208	[M+H]+	82	67	38	0	C82H67O38S0	1659.330484	[M-H]-	82	65	38	0	C82H65O38S0	1657.315931
82	Proanthocyanidin Polymers	Proanthocyanidin Pentamer	Proanthocyanidin Pentamer 4Egc1Egcg	M	82	66	39	0	C82H66O39S0	1674.318122	[M+H]+	82	67	39	0	C82H67O39S0	1675.325399	[M-H]-	82	65	39	0	C82H65O39S0	1673.310846
83	Proanthocyanidin Polymers	Proanthocyanidin Pentamer	Proanthocyanidin Pentamer 1Cat4Egcg	M	103	78	50	0	C103H78O50S0	2114.356083	[M+H]+	103	79	50	0	C103H79O50S0	2115.36336	[M-H]-	103	77	50	0	C103H77O50S0	2113.348807
84	Proanthocyanidin Polymers	Proanthocyanidin Pentamer	Proanthocyanidin Pentamer 1Ecg4Egcg	M	110	82	54	0	C110H82O54S0	2266.367042	[M+H]+	110	83	54	0	C110H83O54S0	2267.374319	[M-H]-	110	81	54	0	C110H81O54S0	2265.359766
85	Proanthocyanidin Polymers	Proanthocyanidin Pentamer	Proanthocyanidin Pentamer 1Egc4Egcg	M	103	78	51	0	C103H78O51S0	2130.350998	[M+H]+	103	79	51	0	C103H79O51S0	2131.358275	[M-H]-	103	77	51	0	C103H77O51S0	2129.343722
86	Proanthocyanidin Polymers	Proanthocyanidin Pentamer	Proanthocyanidin Pentamer 3Cat2Ecg	M	89	70	38	0	C89H70O38S0	1746.354508	[M+H]+	89	71	38	0	C89H71O38S0	1747.361784	[M-H]-	89	69	38	0	C89H69O38S0	1745.347231
87	Proanthocyanidin Polymers	Proanthocyanidin Pentamer	Proanthocyanidin Pentamer 3Cat2Egc	M	75	62	32	0	C75H62O32S0	1474.32242	[M+H]+	75	63	32	0	C75H63O32S0	1475.329696	[M-H]-	75	61	32	0	C75H61O32S0	1473.315143
88	Proanthocyanidin Polymers	Proanthocyanidin Pentamer	Proanthocyanidin Pentamer 3Cat2Egcg	M	89	70	40	0	C89H70O40S0	1778.344337	[M+H]+	89	71	40	0	C89H71O40S0	1779.351613	[M-H]-	89	69	40	0	C89H69O40S0	1777.337061
89	Proanthocyanidin Polymers	Proanthocyanidin Pentamer	Proanthocyanidin Pentamer 2Cat3Ecg	M	96	74	42	0	C96H74O42S0	1898.365466	[M+H]+	96	75	42	0	C96H75O42S0	1899.372743	[M-H]-	96	73	42	0	C96H73O42S0	1897.35819
90	Proanthocyanidin Polymers	Proanthocyanidin Pentamer	Proanthocyanidin Pentamer 3Ecg2Egc	M	96	74	44	0	C96H74O44S0	1930.355296	[M+H]+	96	75	44	0	C96H75O44S0	1931.362572	[M-H]-	96	73	44	0	C96H73O44S0	1929.348019
91	Proanthocyanidin Polymers	Proanthocyanidin Pentamer	Proanthocyanidin Pentamer 3Ecg2Egcg	M	110	82	52	0	C110H82O52S0	2234.377213	[M+H]+	110	83	52	0	C110H83O52S0	2235.384489	[M-H]-	110	81	52	0	C110H81O52S0	2233.369936
92	Proanthocyanidin Polymers	Proanthocyanidin Pentamer	Proanthocyanidin Pentamer 2Cat3Egc	M	75	62	33	0	C75H62O33S0	1490.317334	[M+H]+	75	63	33	0	C75H63O33S0	1491.324611	[M-H]-	75	61	33	0	C75H61O33S0	1489.310058
93	Proanthocyanidin Polymers	Proanthocyanidin Pentamer	Proanthocyanidin Pentamer 2Ecg3Egc	M	89	70	41	0	C89H70O41S0	1794.339252	[M+H]+	89	71	41	0	C89H71O41S0	1795.346528	[M-H]-	89	69	41	0	C89H69O41S0	1793.331975
94	Proanthocyanidin Polymers	Proanthocyanidin Pentamer	Proanthocyanidin Pentamer 3Egc2Egcg	M	89	70	43	0	C89H70O43S0	1826.329081	[M+H]+	89	71	43	0	C89H71O43S0	1827.336357	[M-H]-	89	69	43	0	C89H69O43S0	1825.321804
95	Proanthocyanidin Polymers	Proanthocyanidin Pentamer	Proanthocyanidin Pentamer 2Cat3Egcg	M	96	74	45	0	C96H74O45S0	1946.35021	[M+H]+	96	75	45	0	C96H75O45S0	1947.357487	[M-H]-	96	73	45	0	C96H73O45S0	1945.342934
96	Proanthocyanidin Polymers	Proanthocyanidin Pentamer	Proanthocyanidin Pentamer 2Ecg3Egcg	M	110	82	53	0	C110H82O53S0	2250.372127	[M+H]+	110	83	53	0	C110H83O53S0	2251.379404	[M-H]-	110	81	53	0	C110H81O53S0	2249.364851
97	Proanthocyanidin Polymers	Proanthocyanidin Pentamer	Proanthocyanidin Pentamer 2Egc3Egcg	M	96	74	47	0	C96H74O47S0	1978.34004	[M+H]+	96	75	47	0	C96H75O47S0	1979.347316	[M-H]-	96	73	47	0	C96H73O47S0	1977.332763
98	Proanthocyanidin Polymers	Proanthocyanidin Pentamer	Proanthocyanidin Pentamer 3Cat1Ecg1Egc	M	82	66	35	0	C82H66O35S0	1610.338464	[M+H]+	82	67	35	0	C82H67O35S0	1611.34574	[M-H]-	82	65	35	0	C82H65O35S0	1609.331187
99	Proanthocyanidin Polymers	Proanthocyanidin Pentamer	Proanthocyanidin Pentamer 3Cat1Ecg1Egcg	M	89	70	39	0	C89H70O39S0	1762.349422	[M+H]+	89	71	39	0	C89H71O39S0	1763.356699	[M-H]-	89	69	39	0	C89H69O39S0	1761.342146
100	Proanthocyanidin Polymers	Proanthocyanidin Pentamer	Proanthocyanidin Pentamer 3Cat1Egc1Egcg	M	82	66	36	0	C82H66O36S0	1626.333378	[M+H]+	82	67	36	0	C82H67O36S0	1627.340655	[M-H]-	82	65	36	0	C82H65O36S0	1625.326102
101	Proanthocyanidin Polymers	Proanthocyanidin Pentamer	Proanthocyanidin Pentamer 1Cat3Ecg1Egc	M	96	74	43	0	C96H74O43S0	1914.360381	[M+H]+	96	75	43	0	C96H75O43S0	1915.367657	[M-H]-	96	73	43	0	C96H73O43S0	1913.353105
102	Proanthocyanidin Polymers	Proanthocyanidin Pentamer	Proanthocyanidin Pentamer 1Cat3Ecg1Egcg	M	103	78	47	0	C103H78O47S0	2066.37134	[M+H]+	103	79	47	0	C103H79O47S0	2067.378616	[M-H]-	103	77	47	0	C103H77O47S0	2065.364063
103	Proanthocyanidin Polymers	Proanthocyanidin Pentamer	Proanthocyanidin Pentamer 3Ecg1Egc1Egcg	M	103	78	48	0	C103H78O48S0	2082.366254	[M+H]+	103	79	48	0	C103H79O48S0	2083.373531	[M-H]-	103	77	48	0	C103H77O48S0	2081.358978
104	Proanthocyanidin Polymers	Proanthocyanidin Pentamer	Proanthocyanidin Pentamer 1Cat1Ecg3Egc	M	82	66	37	0	C82H66O37S0	1642.328293	[M+H]+	82	67	37	0	C82H67O37S0	1643.33557	[M-H]-	82	65	37	0	C82H65O37S0	1641.321017
105	Proanthocyanidin Polymers	Proanthocyanidin Pentamer	Proanthocyanidin Pentamer 1Cat3Egc1Egcg	M	82	66	38	0	C82H66O38S0	1658.323208	[M+H]+	82	67	38	0	C82H67O38S0	1659.330484	[M-H]-	82	65	38	0	C82H65O38S0	1657.315931
106	Proanthocyanidin Polymers	Proanthocyanidin Pentamer	Proanthocyanidin Pentamer 1Ecg3Egc1Egcg	M	89	70	42	0	C89H70O42S0	1810.334166	[M+H]+	89	71	42	0	C89H71O42S0	1811.341443	[M-H]-	89	69	42	0	C89H69O42S0	1809.32689
107	Proanthocyanidin Polymers	Proanthocyanidin Pentamer	Proanthocyanidin Pentamer 1Cat1Ecg3Egcg	M	103	78	49	0	C103H78O49S0	2098.361169	[M+H]+	103	79	49	0	C103H79O49S0	2099.368445	[M-H]-	103	77	49	0	C103H77O49S0	2097.353892
108	Proanthocyanidin Polymers	Proanthocyanidin Pentamer	Proanthocyanidin Pentamer 1Cat1Egc3Egcg	M	96	74	46	0	C96H74O46S0	1962.345125	[M+H]+	96	75	46	0	C96H75O46S0	1963.352401	[M-H]-	96	73	46	0	C96H73O46S0	1961.337848
109	Proanthocyanidin Polymers	Proanthocyanidin Pentamer	Proanthocyanidin Pentamer 1Ecg1Egc3Egcg	M	103	78	50	0	C103H78O50S0	2114.356083	[M+H]+	103	79	50	0	C103H79O50S0	2115.36336	[M-H]-	103	77	50	0	C103H77O50S0	2113.348807
110	Proanthocyanidin Polymers	Proanthocyanidin Pentamer	Proanthocyanidin Pentamer 1Cat2Ecg2Egc	M	89	70	40	0	C89H70O40S0	1778.344337	[M+H]+	89	71	40	0	C89H71O40S0	1779.351613	[M-H]-	89	69	40	0	C89H69O40S0	1777.337061
111	Proanthocyanidin Polymers	Proanthocyanidin Pentamer	Proanthocyanidin Pentamer 1Cat2Ecg2Egcg	M	103	78	48	0	C103H78O48S0	2082.366254	[M+H]+	103	79	48	0	C103H79O48S0	2083.373531	[M-H]-	103	77	48	0	C103H77O48S0	2081.358978
112	Proanthocyanidin Polymers	Proanthocyanidin Pentamer	Proanthocyanidin Pentamer 1Cat2Egc2Egcg	M	89	70	42	0	C89H70O42S0	1810.334166	[M+H]+	89	71	42	0	C89H71O42S0	1811.341443	[M-H]-	89	69	42	0	C89H69O42S0	1809.32689
113	Proanthocyanidin Polymers	Proanthocyanidin Pentamer	Proanthocyanidin Pentamer 2Cat1Ecg2Egc	M	82	66	36	0	C82H66O36S0	1626.333378	[M+H]+	82	67	36	0	C82H67O36S0	1627.340655	[M-H]-	82	65	36	0	C82H65O36S0	1625.326102
114	Proanthocyanidin Polymers	Proanthocyanidin Pentamer	Proanthocyanidin Pentamer 2Cat1Ecg2Egcg	M	96	74	44	0	C96H74O44S0	1930.355296	[M+H]+	96	75	44	0	C96H75O44S0	1931.362572	[M-H]-	96	73	44	0	C96H73O44S0	1929.348019
115	Proanthocyanidin Polymers	Proanthocyanidin Pentamer	Proanthocyanidin Pentamer 1Ecg2Egc2Egcg	M	96	74	46	0	C96H74O46S0	1962.345125	[M+H]+	96	75	46	0	C96H75O46S0	1963.352401	[M-H]-	96	73	46	0	C96H73O46S0	1961.337848
116	Proanthocyanidin Polymers	Proanthocyanidin Pentamer	Proanthocyanidin Pentamer 2Cat2Ecg1Egc	M	89	70	39	0	C89H70O39S0	1762.349422	[M+H]+	89	71	39	0	C89H71O39S0	1763.356699	[M-H]-	89	69	39	0	C89H69O39S0	1761.342146
117	Proanthocyanidin Polymers	Proanthocyanidin Pentamer	Proanthocyanidin Pentamer 2Cat1Egc2Egcg	M	89	70	41	0	C89H70O41S0	1794.339252	[M+H]+	89	71	41	0	C89H71O41S0	1795.346528	[M-H]-	89	69	41	0	C89H69O41S0	1793.331975
118	Proanthocyanidin Polymers	Proanthocyanidin Pentamer	Proanthocyanidin Pentamer 2Ecg1Egc2Egcg	M	103	78	49	0	C103H78O49S0	2098.361169	[M+H]+	103	79	49	0	C103H79O49S0	2099.368445	[M-H]-	103	77	49	0	C103H77O49S0	2097.353892
119	Proanthocyanidin Polymers	Proanthocyanidin Pentamer	Proanthocyanidin Pentamer 2Cat2Ecg1Egcg	M	96	74	43	0	C96H74O43S0	1914.360381	[M+H]+	96	75	43	0	C96H75O43S0	1915.367657	[M-H]-	96	73	43	0	C96H73O43S0	1913.353105
120	Proanthocyanidin Polymers	Proanthocyanidin Pentamer	Proanthocyanidin Pentamer 2Cat2Egc1Egcg	M	82	66	37	0	C82H66O37S0	1642.328293	[M+H]+	82	67	37	0	C82H67O37S0	1643.33557	[M-H]-	82	65	37	0	C82H65O37S0	1641.321017
121	Proanthocyanidin Polymers	Proanthocyanidin Pentamer	Proanthocyanidin Pentamer 2Ecg2Egc1Egcg	M	96	74	45	0	C96H74O45S0	1946.35021	[M+H]+	96	75	45	0	C96H75O45S0	1947.357487	[M-H]-	96	73	45	0	C96H73O45S0	1945.342934
122	Proanthocyanidin Polymers	Proanthocyanidin Pentamer	Proanthocyanidin Pentamer 2Cat1Ecg1Egc1Egcg	M	89	70	40	0	C89H70O40S0	1778.344337	[M+H]+	89	71	40	0	C89H71O40S0	1779.351613	[M-H]-	89	69	40	0	C89H69O40S0	1777.337061
123	Proanthocyanidin Polymers	Proanthocyanidin Pentamer	Proanthocyanidin Pentamer 1Cat2Ecg1Egc1Egcg	M	96	74	44	0	C96H74O44S0	1930.355296	[M+H]+	96	75	44	0	C96H75O44S0	1931.362572	[M-H]-	96	73	44	0	C96H73O44S0	1929.348019
124	Proanthocyanidin Polymers	Proanthocyanidin Pentamer	Proanthocyanidin Pentamer 1Cat1Ecg2Egc1Egcg	M	89	70	41	0	C89H70O41S0	1794.339252	[M+H]+	89	71	41	0	C89H71O41S0	1795.346528	[M-H]-	89	69	41	0	C89H69O41S0	1793.331975
125	Proanthocyanidin Polymers	Proanthocyanidin Pentamer	Proanthocyanidin Pentamer 1Cat1Ecg1Egc2Egcg	M	96	74	45	0	C96H74O45S0	1946.35021	[M+H]+	96	75	45	0	C96H75O45S0	1947.357487	[M-H]-	96	73	45	0	C96H73O45S0	1945.342934
126	Proanthocyanidin Polymers	Proanthocyanidin Hexamer	Proanthocyanidin Hexamer 6Cat	M	90	74	36	0	C90H74O36S0	1730.395979	[M+H]+	90	75	36	0	C90H75O36S0	1731.403255	[M-H]-	90	73	36	0	C90H73O36S0	1729.388702
127	Proanthocyanidin Polymers	Proanthocyanidin Hexamer	Proanthocyanidin Hexamer 6Ecg	M	132	98	60	0	C132H98O60S0	2642.46173	[M+H]+	132	99	60	0	C132H99O60S0	2643.469007	[M-H]-	132	97	60	0	C132H97O60S0	2641.454454
128	Proanthocyanidin Polymers	Proanthocyanidin Hexamer	Proanthocyanidin Hexamer 6Egc	M	90	74	42	0	C90H74O42S0	1826.365466	[M+H]+	90	75	42	0	C90H75O42S0	1827.372743	[M-H]-	90	73	42	0	C90H73O42S0	1825.35819
129	Proanthocyanidin Polymers	Proanthocyanidin Hexamer	Proanthocyanidin Hexamer 6Egcg	M	132	98	66	0	C132H98O66S0	2738.431218	[M+H]+	132	99	66	0	C132H99O66S0	2739.438495	[M-H]-	132	97	66	0	C132H97O66S0	2737.423942
130	Proanthocyanidin Polymers	Proanthocyanidin Hexamer	Proanthocyanidin Hexamer 5Cat1Ecg	M	97	78	40	0	C97H78O40S0	1882.406937	[M+H]+	97	79	40	0	C97H79O40S0	1883.414214	[M-H]-	97	77	40	0	C97H77O40S0	1881.399661
131	Proanthocyanidin Polymers	Proanthocyanidin Hexamer	Proanthocyanidin Hexamer 5Cat1Egc	M	90	74	37	0	C90H74O37S0	1746.390893	[M+H]+	90	75	37	0	C90H75O37S0	1747.39817	[M-H]-	90	73	37	0	C90H73O37S0	1745.383617
132	Proanthocyanidin Polymers	Proanthocyanidin Hexamer	Proanthocyanidin Hexamer 5Cat1Egcg	M	97	78	41	0	C97H78O41S0	1898.401852	[M+H]+	97	79	41	0	C97H79O41S0	1899.409128	[M-H]-	97	77	41	0	C97H77O41S0	1897.394575
133	Proanthocyanidin Polymers	Proanthocyanidin Hexamer	Proanthocyanidin Hexamer 1Cat5Ecg	M	125	94	56	0	C125H94O56S0	2490.450772	[M+H]+	125	95	56	0	C125H95O56S0	2491.458048	[M-H]-	125	93	56	0	C125H93O56S0	2489.443495
134	Proanthocyanidin Polymers	Proanthocyanidin Hexamer	Proanthocyanidin Hexamer 5Ecg1Egc	M	125	94	57	0	C125H94O57S0	2506.445686	[M+H]+	125	95	57	0	C125H95O57S0	2507.452963	[M-H]-	125	93	57	0	C125H93O57S0	2505.43841
135	Proanthocyanidin Polymers	Proanthocyanidin Hexamer	Proanthocyanidin Hexamer 5Ecg1Egcg	M	132	98	61	0	C132H98O61S0	2658.456645	[M+H]+	132	99	61	0	C132H99O61S0	2659.463921	[M-H]-	132	97	61	0	C132H97O61S0	2657.449368
136	Proanthocyanidin Polymers	Proanthocyanidin Hexamer	Proanthocyanidin Hexamer 1Cat5Egc	M	90	74	41	0	C90H74O41S0	1810.370552	[M+H]+	90	75	41	0	C90H75O41S0	1811.377828	[M-H]-	90	73	41	0	C90H73O41S0	1809.363275
137	Proanthocyanidin Polymers	Proanthocyanidin Hexamer	Proanthocyanidin Hexamer 1Ecg5Egc	M	97	78	45	0	C97H78O45S0	1962.38151	[M+H]+	97	79	45	0	C97H79O45S0	1963.388787	[M-H]-	97	77	45	0	C97H77O45S0	1961.374234
138	Proanthocyanidin Polymers	Proanthocyanidin Hexamer	Proanthocyanidin Hexamer 5Egc1Egcg	M	97	78	46	0	C97H78O46S0	1978.376425	[M+H]+	97	79	46	0	C97H79O46S0	1979.383701	[M-H]-	97	77	46	0	C97H77O46S0	1977.369149
139	Proanthocyanidin Polymers	Proanthocyanidin Hexamer	Proanthocyanidin Hexamer 1Cat5Egcg	M	125	94	61	0	C125H94O61S0	2570.425345	[M+H]+	125	95	61	0	C125H95O61S0	2571.432621	[M-H]-	125	93	61	0	C125H93O61S0	2569.418068
140	Proanthocyanidin Polymers	Proanthocyanidin Hexamer	Proanthocyanidin Hexamer 1Ecg5Egcg	M	132	98	65	0	C132H98O65S0	2722.436303	[M+H]+	132	99	65	0	C132H99O65S0	2723.44358	[M-H]-	132	97	65	0	C132H97O65S0	2721.429027
141	Proanthocyanidin Polymers	Proanthocyanidin Hexamer	Proanthocyanidin Hexamer 1Egc5Egcg	M	125	94	62	0	C125H94O62S0	2586.420259	[M+H]+	125	95	62	0	C125H95O62S0	2587.427536	[M-H]-	125	93	62	0	C125H93O62S0	2585.412983
142	Proanthocyanidin Polymers	Proanthocyanidin Hexamer	Proanthocyanidin Hexamer 4Cat2Ecg	M	104	82	44	0	C104H82O44S0	2034.417896	[M+H]+	104	83	44	0	C104H83O44S0	2035.425172	[M-H]-	104	81	44	0	C104H81O44S0	2033.410619
143	Proanthocyanidin Polymers	Proanthocyanidin Hexamer	Proanthocyanidin Hexamer 4Cat2Egc	M	90	74	38	0	C90H74O38S0	1762.385808	[M+H]+	90	75	38	0	C90H75O38S0	1763.393084	[M-H]-	90	73	38	0	C90H73O38S0	1761.378531
144	Proanthocyanidin Polymers	Proanthocyanidin Hexamer	Proanthocyanidin Hexamer 4Cat2Egcg	M	104	82	46	0	C104H82O46S0	2066.407725	[M+H]+	104	83	46	0	C104H83O46S0	2067.415002	[M-H]-	104	81	46	0	C104H81O46S0	2065.400449
145	Proanthocyanidin Polymers	Proanthocyanidin Hexamer	Proanthocyanidin Hexamer 2Cat4Ecg	M	118	90	52	0	C118H90O52S0	2338.439813	[M+H]+	118	91	52	0	C118H91O52S0	2339.44709	[M-H]-	118	89	52	0	C118H89O52S0	2337.432537
146	Proanthocyanidin Polymers	Proanthocyanidin Hexamer	Proanthocyanidin Hexamer 4Ecg2Egc	M	118	90	54	0	C118H90O54S0	2370.429642	[M+H]+	118	91	54	0	C118H91O54S0	2371.436919	[M-H]-	118	89	54	0	C118H89O54S0	2369.422366
147	Proanthocyanidin Polymers	Proanthocyanidin Hexamer	Proanthocyanidin Hexamer 4Ecg2Egcg	M	132	98	62	0	C132H98O62S0	2674.45156	[M+H]+	132	99	62	0	C132H99O62S0	2675.458836	[M-H]-	132	97	62	0	C132H97O62S0	2673.444283
148	Proanthocyanidin Polymers	Proanthocyanidin Hexamer	Proanthocyanidin Hexamer 2Cat4Egc	M	90	74	40	0	C90H74O40S0	1794.375637	[M+H]+	90	75	40	0	C90H75O40S0	1795.382914	[M-H]-	90	73	40	0	C90H73O40S0	1793.368361
149	Proanthocyanidin Polymers	Proanthocyanidin Hexamer	Proanthocyanidin Hexamer 2Ecg4Egc	M	104	82	48	0	C104H82O48S0	2098.397554	[M+H]+	104	83	48	0	C104H83O48S0	2099.404831	[M-H]-	104	81	48	0	C104H81O48S0	2097.390278
150	Proanthocyanidin Polymers	Proanthocyanidin Hexamer	Proanthocyanidin Hexamer 4Egc2Egcg	M	104	82	50	0	C104H82O50S0	2130.387384	[M+H]+	104	83	50	0	C104H83O50S0	2131.39466	[M-H]-	104	81	50	0	C104H81O50S0	2129.380107
151	Proanthocyanidin Polymers	Proanthocyanidin Hexamer	Proanthocyanidin Hexamer 2Cat4Egcg	M	118	90	56	0	C118H90O56S0	2402.419472	[M+H]+	118	91	56	0	C118H91O56S0	2403.426748	[M-H]-	118	89	56	0	C118H89O56S0	2401.412195
152	Proanthocyanidin Polymers	Proanthocyanidin Hexamer	Proanthocyanidin Hexamer 2Ecg4Egcg	M	132	98	64	0	C132H98O64S0	2706.441389	[M+H]+	132	99	64	0	C132H99O64S0	2707.448665	[M-H]-	132	97	64	0	C132H97O64S0	2705.434112
153	Proanthocyanidin Polymers	Proanthocyanidin Hexamer	Proanthocyanidin Hexamer 2Egc4Egcg	M	118	90	58	0	C118H90O58S0	2434.409301	[M+H]+	118	91	58	0	C118H91O58S0	2435.416577	[M-H]-	118	89	58	0	C118H89O58S0	2433.402024
154	Proanthocyanidin Polymers	Proanthocyanidin Hexamer	Proanthocyanidin Hexamer 4Cat1Ecg1Egc	M	97	78	41	0	C97H78O41S0	1898.401852	[M+H]+	97	79	41	0	C97H79O41S0	1899.409128	[M-H]-	97	77	41	0	C97H77O41S0	1897.394575
155	Proanthocyanidin Polymers	Proanthocyanidin Hexamer	Proanthocyanidin Hexamer 4Cat1Ecg1Egcg	M	104	82	45	0	C104H82O45S0	2050.412811	[M+H]+	104	83	45	0	C104H83O45S0	2051.420087	[M-H]-	104	81	45	0	C104H81O45S0	2049.405534
156	Proanthocyanidin Polymers	Proanthocyanidin Hexamer	Proanthocyanidin Hexamer 4Cat1Egc1Egcg	M	97	78	42	0	C97H78O42S0	1914.396767	[M+H]+	97	79	42	0	C97H79O42S0	1915.404043	[M-H]-	97	77	42	0	C97H77O42S0	1913.38949
157	Proanthocyanidin Polymers	Proanthocyanidin Hexamer	Proanthocyanidin Hexamer 1Cat4Ecg1Egc	M	118	90	53	0	C118H90O53S0	2354.434728	[M+H]+	118	91	53	0	C118H91O53S0	2355.442004	[M-H]-	118	89	53	0	C118H89O53S0	2353.427451
158	Proanthocyanidin Polymers	Proanthocyanidin Hexamer	Proanthocyanidin Hexamer 1Cat4Ecg1Egcg	M	125	94	57	0	C125H94O57S0	2506.445686	[M+H]+	125	95	57	0	C125H95O57S0	2507.452963	[M-H]-	125	93	57	0	C125H93O57S0	2505.43841
159	Proanthocyanidin Polymers	Proanthocyanidin Hexamer	Proanthocyanidin Hexamer 4Ecg1Egc1Egcg	M	125	94	58	0	C125H94O58S0	2522.440601	[M+H]+	125	95	58	0	C125H95O58S0	2523.447877	[M-H]-	125	93	58	0	C125H93O58S0	2521.433325
160	Proanthocyanidin Polymers	Proanthocyanidin Hexamer	Proanthocyanidin Hexamer 1Cat1Ecg4Egc	M	97	78	44	0	C97H78O44S0	1946.386596	[M+H]+	97	79	44	0	C97H79O44S0	1947.393872	[M-H]-	97	77	44	0	C97H77O44S0	1945.379319
161	Proanthocyanidin Polymers	Proanthocyanidin Hexamer	Proanthocyanidin Hexamer 1Cat4Egc1Egcg	M	97	78	45	0	C97H78O45S0	1962.38151	[M+H]+	97	79	45	0	C97H79O45S0	1963.388787	[M-H]-	97	77	45	0	C97H77O45S0	1961.374234
162	Proanthocyanidin Polymers	Proanthocyanidin Hexamer	Proanthocyanidin Hexamer 1Ecg4Egc1Egcg	M	104	82	49	0	C104H82O49S0	2114.392469	[M+H]+	104	83	49	0	C104H83O49S0	2115.399745	[M-H]-	104	81	49	0	C104H81O49S0	2113.385193
163	Proanthocyanidin Polymers	Proanthocyanidin Hexamer	Proanthocyanidin Hexamer 1Cat1Ecg4Egcg	M	125	94	60	0	C125H94O60S0	2554.43043	[M+H]+	125	95	60	0	C125H95O60S0	2555.437707	[M-H]-	125	93	60	0	C125H93O60S0	2553.423154
164	Proanthocyanidin Polymers	Proanthocyanidin Hexamer	Proanthocyanidin Hexamer 1Cat1Egc4Egcg	M	118	90	57	0	C118H90O57S0	2418.414386	[M+H]+	118	91	57	0	C118H91O57S0	2419.421663	[M-H]-	118	89	57	0	C118H89O57S0	2417.40711
165	Proanthocyanidin Polymers	Proanthocyanidin Hexamer	Proanthocyanidin Hexamer 1Ecg1Egc4Egcg	M	125	94	61	0	C125H94O61S0	2570.425345	[M+H]+	125	95	61	0	C125H95O61S0	2571.432621	[M-H]-	125	93	61	0	C125H93O61S0	2569.418068
166	Proanthocyanidin Polymers	Proanthocyanidin Hexamer	Proanthocyanidin Hexamer 3Cat3Ecg	M	111	86	48	0	C111H86O48S0	2186.428855	[M+H]+	111	87	48	0	C111H87O48S0	2187.436131	[M-H]-	111	85	48	0	C111H85O48S0	2185.421578
167	Proanthocyanidin Polymers	Proanthocyanidin Hexamer	Proanthocyanidin Hexamer 3Cat3Egc	M	90	74	39	0	C90H74O39S0	1778.380723	[M+H]+	90	75	39	0	C90H75O39S0	1779.387999	[M-H]-	90	73	39	0	C90H73O39S0	1777.373446
168	Proanthocyanidin Polymers	Proanthocyanidin Hexamer	Proanthocyanidin Hexamer 3Cat3Egcg	M	111	86	51	0	C111H86O51S0	2234.413598	[M+H]+	111	87	51	0	C111H87O51S0	2235.420875	[M-H]-	111	85	51	0	C111H85O51S0	2233.406322
169	Proanthocyanidin Polymers	Proanthocyanidin Hexamer	Proanthocyanidin Hexamer 3Ecg3Egc	M	111	86	51	0	C111H86O51S0	2234.413598	[M+H]+	111	87	51	0	C111H87O51S0	2235.420875	[M-H]-	111	85	51	0	C111H85O51S0	2233.406322
170	Proanthocyanidin Polymers	Proanthocyanidin Hexamer	Proanthocyanidin Hexamer 3Ecg3Egcg	M	132	98	63	0	C132H98O63S0	2690.446474	[M+H]+	132	99	63	0	C132H99O63S0	2691.453751	[M-H]-	132	97	63	0	C132H97O63S0	2689.439198
171	Proanthocyanidin Polymers	Proanthocyanidin Hexamer	Proanthocyanidin Hexamer 3Egc3Egcg	M	111	86	54	0	C111H86O54S0	2282.398342	[M+H]+	111	87	54	0	C111H87O54S0	2283.405619	[M-H]-	111	85	54	0	C111H85O54S0	2281.391066
172	Proanthocyanidin Polymers	Proanthocyanidin Hexamer	Proanthocyanidin Hexamer 3Cat2Ecg1Egc	M	104	82	45	0	C104H82O45S0	2050.412811	[M+H]+	104	83	45	0	C104H83O45S0	2051.420087	[M-H]-	104	81	45	0	C104H81O45S0	2049.405534
173	Proanthocyanidin Polymers	Proanthocyanidin Hexamer	Proanthocyanidin Hexamer 3Cat2Ecg1Egcg	M	111	86	49	0	C111H86O49S0	2202.423769	[M+H]+	111	87	49	0	C111H87O49S0	2203.431046	[M-H]-	111	85	49	0	C111H85O49S0	2201.416493
174	Proanthocyanidin Polymers	Proanthocyanidin Hexamer	Proanthocyanidin Hexamer 3Cat1Ecg2Egc	M	97	78	42	0	C97H78O42S0	1914.396767	[M+H]+	97	79	42	0	C97H79O42S0	1915.404043	[M-H]-	97	77	42	0	C97H77O42S0	1913.38949
175	Proanthocyanidin Polymers	Proanthocyanidin Hexamer	Proanthocyanidin Hexamer 3Cat1Ecg2Egcg	M	111	86	50	0	C111H86O50S0	2218.418684	[M+H]+	111	87	50	0	C111H87O50S0	2219.42596	[M-H]-	111	85	50	0	C111H85O50S0	2217.411407
176	Proanthocyanidin Polymers	Proanthocyanidin Hexamer	Proanthocyanidin Hexamer 3Cat1Egc2Egcg	M	104	82	47	0	C104H82O47S0	2082.40264	[M+H]+	104	83	47	0	C104H83O47S0	2083.409916	[M-H]-	104	81	47	0	C104H81O47S0	2081.395363
177	Proanthocyanidin Polymers	Proanthocyanidin Hexamer	Proanthocyanidin Hexamer 3Cat2Egc1Egcg	M	97	78	43	0	C97H78O43S0	1930.391681	[M+H]+	97	79	43	0	C97H79O43S0	1931.398958	[M-H]-	97	77	43	0	C97H77O43S0	1929.384405
178	Proanthocyanidin Polymers	Proanthocyanidin Hexamer	Proanthocyanidin Hexamer 2Cat3Ecg1Egc	M	111	86	49	0	C111H86O49S0	2202.423769	[M+H]+	111	87	49	0	C111H87O49S0	2203.431046	[M-H]-	111	85	49	0	C111H85O49S0	2201.416493
179	Proanthocyanidin Polymers	Proanthocyanidin Hexamer	Proanthocyanidin Hexamer 2Cat3Ecg1Egcg	M	118	90	53	0	C118H90O53S0	2354.434728	[M+H]+	118	91	53	0	C118H91O53S0	2355.442004	[M-H]-	118	89	53	0	C118H89O53S0	2353.427451
180	Proanthocyanidin Polymers	Proanthocyanidin Hexamer	Proanthocyanidin Hexamer 1Cat3Ecg2Egc	M	111	86	50	0	C111H86O50S0	2218.418684	[M+H]+	111	87	50	0	C111H87O50S0	2219.42596	[M-H]-	111	85	50	0	C111H85O50S0	2217.411407
181	Proanthocyanidin Polymers	Proanthocyanidin Hexamer	Proanthocyanidin Hexamer 1Cat3Ecg2Egcg	M	125	94	58	0	C125H94O58S0	2522.440601	[M+H]+	125	95	58	0	C125H95O58S0	2523.447877	[M-H]-	125	93	58	0	C125H93O58S0	2521.433325
182	Proanthocyanidin Polymers	Proanthocyanidin Hexamer	Proanthocyanidin Hexamer 3Ecg1Egc2Egcg	M	125	94	59	0	C125H94O59S0	2538.435516	[M+H]+	125	95	59	0	C125H95O59S0	2539.442792	[M-H]-	125	93	59	0	C125H93O59S0	2537.428239
183	Proanthocyanidin Polymers	Proanthocyanidin Hexamer	Proanthocyanidin Hexamer 3Ecg2Egc1Egcg	M	118	90	55	0	C118H90O55S0	2386.424557	[M+H]+	118	91	55	0	C118H91O55S0	2387.431833	[M-H]-	118	89	55	0	C118H89O55S0	2385.417281
184	Proanthocyanidin Polymers	Proanthocyanidin Hexamer	Proanthocyanidin Hexamer 2Cat1Ecg3Egc	M	97	78	43	0	C97H78O43S0	1930.391681	[M+H]+	97	79	43	0	C97H79O43S0	1931.398958	[M-H]-	97	77	43	0	C97H77O43S0	1929.384405
185	Proanthocyanidin Polymers	Proanthocyanidin Hexamer	Proanthocyanidin Hexamer 2Cat3Egc1Egcg	M	97	78	44	0	C97H78O44S0	1946.386596	[M+H]+	97	79	44	0	C97H79O44S0	1947.393872	[M-H]-	97	77	44	0	C97H77O44S0	1945.379319
186	Proanthocyanidin Polymers	Proanthocyanidin Hexamer	Proanthocyanidin Hexamer 1Cat2Ecg3Egc	M	104	82	47	0	C104H82O47S0	2082.40264	[M+H]+	104	83	47	0	C104H83O47S0	2083.409916	[M-H]-	104	81	47	0	C104H81O47S0	2081.395363
187	Proanthocyanidin Polymers	Proanthocyanidin Hexamer	Proanthocyanidin Hexamer 1Cat3Egc2Egcg	M	104	82	49	0	C104H82O49S0	2114.392469	[M+H]+	104	83	49	0	C104H83O49S0	2115.399745	[M-H]-	104	81	49	0	C104H81O49S0	2113.385193
188	Proanthocyanidin Polymers	Proanthocyanidin Hexamer	Proanthocyanidin Hexamer 1Ecg3Egc2Egcg	M	111	86	53	0	C111H86O53S0	2266.403428	[M+H]+	111	87	53	0	C111H87O53S0	2267.410704	[M-H]-	111	85	53	0	C111H85O53S0	2265.396151
189	Proanthocyanidin Polymers	Proanthocyanidin Hexamer	Proanthocyanidin Hexamer 2Ecg3Egc1Egcg	M	111	86	52	0	C111H86O52S0	2250.408513	[M+H]+	111	87	52	0	C111H87O52S0	2251.415789	[M-H]-	111	85	52	0	C111H85O52S0	2249.401237
190	Proanthocyanidin Polymers	Proanthocyanidin Hexamer	Proanthocyanidin Hexamer 2Cat1Ecg3Egcg	M	118	90	55	0	C118H90O55S0	2386.424557	[M+H]+	118	91	55	0	C118H91O55S0	2387.431833	[M-H]-	118	89	55	0	C118H89O55S0	2385.417281
191	Proanthocyanidin Polymers	Proanthocyanidin Hexamer	Proanthocyanidin Hexamer 2Cat1Egc3Egcg	M	111	86	52	0	C111H86O52S0	2250.408513	[M+H]+	111	87	52	0	C111H87O52S0	2251.415789	[M-H]-	111	85	52	0	C111H85O52S0	2249.401237
192	Proanthocyanidin Polymers	Proanthocyanidin Hexamer	Proanthocyanidin Hexamer 1Cat2Ecg3Egcg	M	125	94	59	0	C125H94O59S0	2538.435516	[M+H]+	125	95	59	0	C125H95O59S0	2539.442792	[M-H]-	125	93	59	0	C125H93O59S0	2537.428239
193	Proanthocyanidin Polymers	Proanthocyanidin Hexamer	Proanthocyanidin Hexamer 1Cat2Egc3Egcg	M	111	86	53	0	C111H86O53S0	2266.403428	[M+H]+	111	87	53	0	C111H87O53S0	2267.410704	[M-H]-	111	85	53	0	C111H85O53S0	2265.396151
194	Proanthocyanidin Polymers	Proanthocyanidin Hexamer	Proanthocyanidin Hexamer 1Ecg2Egc3Egcg	M	118	90	57	0	C118H90O57S0	2418.414386	[M+H]+	118	91	57	0	C118H91O57S0	2419.421663	[M-H]-	118	89	57	0	C118H89O57S0	2417.40711
195	Proanthocyanidin Polymers	Proanthocyanidin Hexamer	Proanthocyanidin Hexamer 2Ecg1Egc3Egcg	M	125	94	60	0	C125H94O60S0	2554.43043	[M+H]+	125	95	60	0	C125H95O60S0	2555.437707	[M-H]-	125	93	60	0	C125H93O60S0	2553.423154
196	Proanthocyanidin Polymers	Proanthocyanidin Hexamer	Proanthocyanidin Hexamer 3Cat1Ecg1Egc1Egcg	M	104	82	46	0	C104H82O46S0	2066.407725	[M+H]+	104	83	46	0	C104H83O46S0	2067.415002	[M-H]-	104	81	46	0	C104H81O46S0	2065.400449
197	Proanthocyanidin Polymers	Proanthocyanidin Hexamer	Proanthocyanidin Hexamer 1Cat3Ecg1Egc1Egcg	M	118	90	54	0	C118H90O54S0	2370.429642	[M+H]+	118	91	54	0	C118H91O54S0	2371.436919	[M-H]-	118	89	54	0	C118H89O54S0	2369.422366
198	Proanthocyanidin Polymers	Proanthocyanidin Hexamer	Proanthocyanidin Hexamer 1Cat1Ecg3Egc1Egcg	M	104	82	48	0	C104H82O48S0	2098.397554	[M+H]+	104	83	48	0	C104H83O48S0	2099.404831	[M-H]-	104	81	48	0	C104H81O48S0	2097.390278
199	Proanthocyanidin Polymers	Proanthocyanidin Hexamer	Proanthocyanidin Hexamer 1Cat1Ecg1Egc3Egcg	M	118	90	56	0	C118H90O56S0	2402.419472	[M+H]+	118	91	56	0	C118H91O56S0	2403.426748	[M-H]-	118	89	56	0	C118H89O56S0	2401.412195
200	Proanthocyanidin Polymers	Proanthocyanidin Hexamer	Proanthocyanidin Hexamer 2Cat2Ecg2Egc	M	104	82	46	0	C104H82O46S0	2066.407725	[M+H]+	104	83	46	0	C104H83O46S0	2067.415002	[M-H]-	104	81	46	0	C104H81O46S0	2065.400449
201	Proanthocyanidin Polymers	Proanthocyanidin Hexamer	Proanthocyanidin Hexamer 2Cat2Ecg2Egcg	M	118	90	54	0	C118H90O54S0	2370.429642	[M+H]+	118	91	54	0	C118H91O54S0	2371.436919	[M-H]-	118	89	54	0	C118H89O54S0	2369.422366
202	Proanthocyanidin Polymers	Proanthocyanidin Hexamer	Proanthocyanidin Hexamer 2Cat2Egc2Egcg	M	104	82	48	0	C104H82O48S0	2098.397554	[M+H]+	104	83	48	0	C104H83O48S0	2099.404831	[M-H]-	104	81	48	0	C104H81O48S0	2097.390278
203	Proanthocyanidin Polymers	Proanthocyanidin Hexamer	Proanthocyanidin Hexamer 2Ecg2Egc2Egcg	M	118	90	56	0	C118H90O56S0	2402.419472	[M+H]+	118	91	56	0	C118H91O56S0	2403.426748	[M-H]-	118	89	56	0	C118H89O56S0	2401.412195
204	Proanthocyanidin Polymers	Proanthocyanidin Hexamer	Proanthocyanidin Hexamer 2Cat2Ecg1Egc1Egcg	M	111	86	50	0	C111H86O50S0	2218.418684	[M+H]+	111	87	50	0	C111H87O50S0	2219.42596	[M-H]-	111	85	50	0	C111H85O50S0	2217.411407
205	Proanthocyanidin Polymers	Proanthocyanidin Hexamer	Proanthocyanidin Hexamer 2Cat1Ecg2Egc1Egcg	M	104	82	47	0	C104H82O47S0	2082.40264	[M+H]+	104	83	47	0	C104H83O47S0	2083.409916	[M-H]-	104	81	47	0	C104H81O47S0	2081.395363
206	Proanthocyanidin Polymers	Proanthocyanidin Hexamer	Proanthocyanidin Hexamer 2Cat1Ecg1Egc2Egcg	M	111	86	51	0	C111H86O51S0	2234.413598	[M+H]+	111	87	51	0	C111H87O51S0	2235.420875	[M-H]-	111	85	51	0	C111H85O51S0	2233.406322
207	Proanthocyanidin Polymers	Proanthocyanidin Hexamer	Proanthocyanidin Hexamer 1Cat2Ecg2Egc1Egcg	M	111	86	51	0	C111H86O51S0	2234.413598	[M+H]+	111	87	51	0	C111H87O51S0	2235.420875	[M-H]-	111	85	51	0	C111H85O51S0	2233.406322
208	Proanthocyanidin Polymers	Proanthocyanidin Hexamer	Proanthocyanidin Hexamer 1Cat2Ecg1Egc2Egcg	M	118	90	55	0	C118H90O55S0	2386.424557	[M+H]+	118	91	55	0	C118H91O55S0	2387.431833	[M-H]-	118	89	55	0	C118H89O55S0	2385.417281
209	Proanthocyanidin Polymers	Proanthocyanidin Hexamer	Proanthocyanidin Hexamer 1Cat1Ecg2Egc2Egcg	M	111	86	52	0	C111H86O52S0	2250.408513	[M+H]+	111	87	52	0	C111H87O52S0	2251.415789	[M-H]-	111	85	52	0	C111H85O52S0	2249.401237
210	Proanthocyanidin Polymers	Proanthocyanidin Septamer	Proanthocyanidin Septamer 7Cat	M	105	86	42	0	C105H86O42S0	2018.459367	[M+H]+	105	87	42	0	C105H87O42S0	2019.466643	[M-H]-	105	85	42	0	C105H85O42S0	2017.45209
211	Proanthocyanidin Polymers	Proanthocyanidin Septamer	Proanthocyanidin Septamer 7Ecg	M	154	114	70	0	C154H114O70S0	3082.536077	[M+H]+	154	115	70	0	C154H115O70S0	3083.543353	[M-H]-	154	113	70	0	C154H113O70S0	3081.528801
212	Proanthocyanidin Polymers	Proanthocyanidin Septamer	Proanthocyanidin Septamer 7Egc	M	105	86	49	0	C105H86O49S0	2130.423769	[M+H]+	105	87	49	0	C105H87O49S0	2131.431046	[M-H]-	105	85	49	0	C105H85O49S0	2129.416493
213	Proanthocyanidin Polymers	Proanthocyanidin Septamer	Proanthocyanidin Septamer 7Egcg	M	154	114	77	0	C154H114O77S0	3194.500479	[M+H]+	154	115	77	0	C154H115O77S0	3195.507756	[M-H]-	154	113	77	0	C154H113O77S0	3193.493203
214	Proanthocyanidin Polymers	Proanthocyanidin Septamer	Proanthocyanidin Septamer 6Cat1Ecg	M	112	90	46	0	C112H90O46S0	2170.470325	[M+H]+	112	91	46	0	C112H91O46S0	2171.477602	[M-H]-	112	89	46	0	C112H89O46S0	2169.463049
215	Proanthocyanidin Polymers	Proanthocyanidin Septamer	Proanthocyanidin Septamer 6Cat1Egc	M	105	86	43	0	C105H86O43S0	2034.454281	[M+H]+	105	87	43	0	C105H87O43S0	2035.461558	[M-H]-	105	85	43	0	C105H85O43S0	2033.447005
216	Proanthocyanidin Polymers	Proanthocyanidin Septamer	Proanthocyanidin Septamer 6Cat1Egcg	M	112	90	47	0	C112H90O47S0	2186.46524	[M+H]+	112	91	47	0	C112H91O47S0	2187.472516	[M-H]-	112	89	47	0	C112H89O47S0	2185.457964
217	Proanthocyanidin Polymers	Proanthocyanidin Septamer	Proanthocyanidin Septamer 1Cat6Ecg	M	147	110	66	0	C147H110O66S0	2930.525118	[M+H]+	147	111	66	0	C147H111O66S0	2931.532395	[M-H]-	147	109	66	0	C147H109O66S0	2929.517842
218	Proanthocyanidin Polymers	Proanthocyanidin Septamer	Proanthocyanidin Septamer 6Ecg1Egc	M	147	110	67	0	C147H110O67S0	2946.520033	[M+H]+	147	111	67	0	C147H111O67S0	2947.52731	[M-H]-	147	109	67	0	C147H109O67S0	2945.512757
219	Proanthocyanidin Polymers	Proanthocyanidin Septamer	Proanthocyanidin Septamer 6Ecg1Egcg	M	154	114	71	0	C154H114O71S0	3098.530992	[M+H]+	154	115	71	0	C154H115O71S0	3099.538268	[M-H]-	154	113	71	0	C154H113O71S0	3097.523715
220	Proanthocyanidin Polymers	Proanthocyanidin Septamer	Proanthocyanidin Septamer 1Cat6Egc	M	105	86	48	0	C105H86O48S0	2114.428855	[M+H]+	105	87	48	0	C105H87O48S0	2115.436131	[M-H]-	105	85	48	0	C105H85O48S0	2113.421578
221	Proanthocyanidin Polymers	Proanthocyanidin Septamer	Proanthocyanidin Septamer 1Ecg6Egc	M	112	90	52	0	C112H90O52S0	2266.439813	[M+H]+	112	91	52	0	C112H91O52S0	2267.44709	[M-H]-	112	89	52	0	C112H89O52S0	2265.432537
222	Proanthocyanidin Polymers	Proanthocyanidin Septamer	Proanthocyanidin Septamer 6Egc1Egcg	M	112	90	53	0	C112H90O53S0	2282.434728	[M+H]+	112	91	53	0	C112H91O53S0	2283.442004	[M-H]-	112	89	53	0	C112H89O53S0	2281.427451
223	Proanthocyanidin Polymers	Proanthocyanidin Septamer	Proanthocyanidin Septamer 1Cat6Egcg	M	147	110	72	0	C147H110O72S0	3026.494606	[M+H]+	147	111	72	0	C147H111O72S0	3027.501883	[M-H]-	147	109	72	0	C147H109O72S0	3025.48733
224	Proanthocyanidin Polymers	Proanthocyanidin Septamer	Proanthocyanidin Septamer 1Ecg6Egcg	M	154	114	76	0	C154H114O76S0	3178.505565	[M+H]+	154	115	76	0	C154H115O76S0	3179.512841	[M-H]-	154	113	76	0	C154H113O76S0	3177.498288
225	Proanthocyanidin Polymers	Proanthocyanidin Septamer	Proanthocyanidin Septamer 1Egc6Egcg	M	147	110	73	0	C147H110O73S0	3042.489521	[M+H]+	147	111	73	0	C147H111O73S0	3043.496797	[M-H]-	147	109	73	0	C147H109O73S0	3041.482244
226	Proanthocyanidin Polymers	Proanthocyanidin Septamer	Proanthocyanidin Septamer 5Cat2Ecg	M	119	94	50	0	C119H94O50S0	2322.481284	[M+H]+	119	95	50	0	C119H95O50S0	2323.48856	[M-H]-	119	93	50	0	C119H93O50S0	2321.474008
227	Proanthocyanidin Polymers	Proanthocyanidin Septamer	Proanthocyanidin Septamer 5Cat2Egc	M	105	86	44	0	C105H86O44S0	2050.449196	[M+H]+	105	87	44	0	C105H87O44S0	2051.456472	[M-H]-	105	85	44	0	C105H85O44S0	2049.44192
228	Proanthocyanidin Polymers	Proanthocyanidin Septamer	Proanthocyanidin Septamer 5Cat2Egcg	M	119	94	52	0	C119H94O52S0	2354.471113	[M+H]+	119	95	52	0	C119H95O52S0	2355.47839	[M-H]-	119	93	52	0	C119H93O52S0	2353.463837
229	Proanthocyanidin Polymers	Proanthocyanidin Septamer	Proanthocyanidin Septamer 2Cat5Ecg	M	140	106	62	0	C140H106O62S0	2778.51416	[M+H]+	140	107	62	0	C140H107O62S0	2779.521436	[M-H]-	140	105	62	0	C140H105O62S0	2777.506883
230	Proanthocyanidin Polymers	Proanthocyanidin Septamer	Proanthocyanidin Septamer 5Ecg2Egc	M	140	106	64	0	C140H106O64S0	2810.503989	[M+H]+	140	107	64	0	C140H107O64S0	2811.511266	[M-H]-	140	105	64	0	C140H105O64S0	2809.496713
231	Proanthocyanidin Polymers	Proanthocyanidin Septamer	Proanthocyanidin Septamer 5Ecg2Egcg	M	154	114	72	0	C154H114O72S0	3114.525906	[M+H]+	154	115	72	0	C154H115O72S0	3115.533183	[M-H]-	154	113	72	0	C154H113O72S0	3113.51863
232	Proanthocyanidin Polymers	Proanthocyanidin Septamer	Proanthocyanidin Septamer 2Cat5Egc	M	105	86	47	0	C105H86O47S0	2098.43394	[M+H]+	105	87	47	0	C105H87O47S0	2099.441216	[M-H]-	105	85	47	0	C105H85O47S0	2097.426663
233	Proanthocyanidin Polymers	Proanthocyanidin Septamer	Proanthocyanidin Septamer 2Ecg5Egc	M	119	94	55	0	C119H94O55S0	2402.455857	[M+H]+	119	95	55	0	C119H95O55S0	2403.463134	[M-H]-	119	93	55	0	C119H93O55S0	2401.448581
234	Proanthocyanidin Polymers	Proanthocyanidin Septamer	Proanthocyanidin Septamer 5Egc2Egcg	M	119	94	57	0	C119H94O57S0	2434.445686	[M+H]+	119	95	57	0	C119H95O57S0	2435.452963	[M-H]-	119	93	57	0	C119H93O57S0	2433.43841
235	Proanthocyanidin Polymers	Proanthocyanidin Septamer	Proanthocyanidin Septamer 2Cat5Egcg	M	140	106	67	0	C140H106O67S0	2858.488733	[M+H]+	140	107	67	0	C140H107O67S0	2859.496009	[M-H]-	140	105	67	0	C140H105O67S0	2857.481456
236	Proanthocyanidin Polymers	Proanthocyanidin Septamer	Proanthocyanidin Septamer 2Ecg5Egcg	M	154	114	75	0	C154H114O75S0	3162.51065	[M+H]+	154	115	75	0	C154H115O75S0	3163.517927	[M-H]-	154	113	75	0	C154H113O75S0	3161.503374
237	Proanthocyanidin Polymers	Proanthocyanidin Septamer	Proanthocyanidin Septamer 2Egc5Egcg	M	140	106	69	0	C140H106O69S0	2890.478562	[M+H]+	140	107	69	0	C140H107O69S0	2891.485839	[M-H]-	140	105	69	0	C140H105O69S0	2889.471286
238	Proanthocyanidin Polymers	Proanthocyanidin Septamer	Proanthocyanidin Septamer 5Cat1Ecg1Egc	M	112	90	47	0	C112H90O47S0	2186.46524	[M+H]+	112	91	47	0	C112H91O47S0	2187.472516	[M-H]-	112	89	47	0	C112H89O47S0	2185.457964
239	Proanthocyanidin Polymers	Proanthocyanidin Septamer	Proanthocyanidin Septamer 5Cat1Ecg1Egcg	M	119	94	51	0	C119H94O51S0	2338.476199	[M+H]+	119	95	51	0	C119H95O51S0	2339.483475	[M-H]-	119	93	51	0	C119H93O51S0	2337.468922
240	Proanthocyanidin Polymers	Proanthocyanidin Septamer	Proanthocyanidin Septamer 5Cat1Egc1Egcg	M	112	90	48	0	C112H90O48S0	2202.460155	[M+H]+	112	91	48	0	C112H91O48S0	2203.467431	[M-H]-	112	89	48	0	C112H89O48S0	2201.452878
241	Proanthocyanidin Polymers	Proanthocyanidin Septamer	Proanthocyanidin Septamer 1Cat5Ecg1Egc	M	140	106	63	0	C140H106O63S0	2794.509074	[M+H]+	140	107	63	0	C140H107O63S0	2795.516351	[M-H]-	140	105	63	0	C140H105O63S0	2793.501798
242	Proanthocyanidin Polymers	Proanthocyanidin Septamer	Proanthocyanidin Septamer 1Cat5Ecg1Egcg	M	147	110	67	0	C147H110O67S0	2946.520033	[M+H]+	147	111	67	0	C147H111O67S0	2947.52731	[M-H]-	147	109	67	0	C147H109O67S0	2945.512757
243	Proanthocyanidin Polymers	Proanthocyanidin Septamer	Proanthocyanidin Septamer 5Ecg1Egc1Egcg	M	147	110	68	0	C147H110O68S0	2962.514948	[M+H]+	147	111	68	0	C147H111O68S0	2963.522224	[M-H]-	147	109	68	0	C147H109O68S0	2961.507671
244	Proanthocyanidin Polymers	Proanthocyanidin Septamer	Proanthocyanidin Septamer 1Cat1Ecg5Egc	M	112	90	51	0	C112H90O51S0	2250.444898	[M+H]+	112	91	51	0	C112H91O51S0	2251.452175	[M-H]-	112	89	51	0	C112H89O51S0	2249.437622
245	Proanthocyanidin Polymers	Proanthocyanidin Septamer	Proanthocyanidin Septamer 1Cat5Egc1Egcg	M	112	90	52	0	C112H90O52S0	2266.439813	[M+H]+	112	91	52	0	C112H91O52S0	2267.44709	[M-H]-	112	89	52	0	C112H89O52S0	2265.432537
246	Proanthocyanidin Polymers	Proanthocyanidin Septamer	Proanthocyanidin Septamer 1Ecg5Egc1Egcg	M	119	94	56	0	C119H94O56S0	2418.450772	[M+H]+	119	95	56	0	C119H95O56S0	2419.458048	[M-H]-	119	93	56	0	C119H93O56S0	2417.443495
247	Proanthocyanidin Polymers	Proanthocyanidin Septamer	Proanthocyanidin Septamer 1Cat1Ecg5Egcg	M	147	110	71	0	C147H110O71S0	3010.499692	[M+H]+	147	111	71	0	C147H111O71S0	3011.506968	[M-H]-	147	109	71	0	C147H109O71S0	3009.492415
248	Proanthocyanidin Polymers	Proanthocyanidin Septamer	Proanthocyanidin Septamer 1Cat1Egc5Egcg	M	140	106	68	0	C140H106O68S0	2874.483648	[M+H]+	140	107	68	0	C140H107O68S0	2875.490924	[M-H]-	140	105	68	0	C140H105O68S0	2873.476371
249	Proanthocyanidin Polymers	Proanthocyanidin Septamer	Proanthocyanidin Septamer 1Ecg1Egc5Egcg	M	147	110	72	0	C147H110O72S0	3026.494606	[M+H]+	147	111	72	0	C147H111O72S0	3027.501883	[M-H]-	147	109	72	0	C147H109O72S0	3025.48733
250	Proanthocyanidin Polymers	Proanthocyanidin Septamer	Proanthocyanidin Septamer 4Cat3Ecg	M	126	98	54	0	C126H98O54S0	2474.492243	[M+H]+	126	99	54	0	C126H99O54S0	2475.499519	[M-H]-	126	97	54	0	C126H97O54S0	2473.484966
251	Proanthocyanidin Polymers	Proanthocyanidin Septamer	Proanthocyanidin Septamer 4Cat3Egc	M	105	86	45	0	C105H86O45S0	2066.444111	[M+H]+	105	87	45	0	C105H87O45S0	2067.451387	[M-H]-	105	85	45	0	C105H85O45S0	2065.436834
252	Proanthocyanidin Polymers	Proanthocyanidin Septamer	Proanthocyanidin Septamer 4Cat3Egcg	M	126	98	57	0	C126H98O57S0	2522.476986	[M+H]+	126	99	57	0	C126H99O57S0	2523.484263	[M-H]-	126	97	57	0	C126H97O57S0	2521.46971
253	Proanthocyanidin Polymers	Proanthocyanidin Septamer	Proanthocyanidin Septamer 3Cat4Ecg	M	133	102	58	0	C133H102O58S0	2626.503201	[M+H]+	133	103	58	0	C133H103O58S0	2627.510478	[M-H]-	133	101	58	0	C133H101O58S0	2625.495925
254	Proanthocyanidin Polymers	Proanthocyanidin Septamer	Proanthocyanidin Septamer 4Ecg3Egc	M	133	102	61	0	C133H102O61S0	2674.487945	[M+H]+	133	103	61	0	C133H103O61S0	2675.495222	[M-H]-	133	101	61	0	C133H101O61S0	2673.480669
255	Proanthocyanidin Polymers	Proanthocyanidin Septamer	Proanthocyanidin Septamer 4Ecg3Egcg	M	154	114	73	0	C154H114O73S0	3130.520821	[M+H]+	154	115	73	0	C154H115O73S0	3131.528097	[M-H]-	154	113	73	0	C154H113O73S0	3129.513544
256	Proanthocyanidin Polymers	Proanthocyanidin Septamer	Proanthocyanidin Septamer 3Cat4Egc	M	105	86	46	0	C105H86O46S0	2082.439025	[M+H]+	105	87	46	0	C105H87O46S0	2083.446302	[M-H]-	105	85	46	0	C105H85O46S0	2081.431749
257	Proanthocyanidin Polymers	Proanthocyanidin Septamer	Proanthocyanidin Septamer 3Ecg4Egc	M	126	98	58	0	C126H98O58S0	2538.471901	[M+H]+	126	99	58	0	C126H99O58S0	2539.479178	[M-H]-	126	97	58	0	C126H97O58S0	2537.464625
258	Proanthocyanidin Polymers	Proanthocyanidin Septamer	Proanthocyanidin Septamer 4Egc3Egcg	M	126	98	61	0	C126H98O61S0	2586.456645	[M+H]+	126	99	61	0	C126H99O61S0	2587.463921	[M-H]-	126	97	61	0	C126H97O61S0	2585.449368
259	Proanthocyanidin Polymers	Proanthocyanidin Septamer	Proanthocyanidin Septamer 3Cat4Egcg	M	133	102	62	0	C133H102O62S0	2690.48286	[M+H]+	133	103	62	0	C133H103O62S0	2691.490136	[M-H]-	133	101	62	0	C133H101O62S0	2689.475583
260	Proanthocyanidin Polymers	Proanthocyanidin Septamer	Proanthocyanidin Septamer 3Ecg4Egcg	M	154	114	74	0	C154H114O74S0	3146.515736	[M+H]+	154	115	74	0	C154H115O74S0	3147.523012	[M-H]-	154	113	74	0	C154H113O74S0	3145.508459
261	Proanthocyanidin Polymers	Proanthocyanidin Septamer	Proanthocyanidin Septamer 3Egc4Egcg	M	133	102	65	0	C133H102O65S0	2738.467604	[M+H]+	133	103	65	0	C133H103O65S0	2739.47488	[M-H]-	133	101	65	0	C133H101O65S0	2737.460327
262	Proanthocyanidin Polymers	Proanthocyanidin Septamer	Proanthocyanidin Septamer 4Cat2Ecg1Egc	M	119	94	51	0	C119H94O51S0	2338.476199	[M+H]+	119	95	51	0	C119H95O51S0	2339.483475	[M-H]-	119	93	51	0	C119H93O51S0	2337.468922
263	Proanthocyanidin Polymers	Proanthocyanidin Septamer	Proanthocyanidin Septamer 4Cat2Ecg1Egcg	M	126	98	55	0	C126H98O55S0	2490.487157	[M+H]+	126	99	55	0	C126H99O55S0	2491.494434	[M-H]-	126	97	55	0	C126H97O55S0	2489.479881
264	Proanthocyanidin Polymers	Proanthocyanidin Septamer	Proanthocyanidin Septamer 4Cat1Ecg2Egc	M	112	90	48	0	C112H90O48S0	2202.460155	[M+H]+	112	91	48	0	C112H91O48S0	2203.467431	[M-H]-	112	89	48	0	C112H89O48S0	2201.452878
265	Proanthocyanidin Polymers	Proanthocyanidin Septamer	Proanthocyanidin Septamer 4Cat1Ecg2Egcg	M	126	98	56	0	C126H98O56S0	2506.482072	[M+H]+	126	99	56	0	C126H99O56S0	2507.489348	[M-H]-	126	97	56	0	C126H97O56S0	2505.474795
266	Proanthocyanidin Polymers	Proanthocyanidin Septamer	Proanthocyanidin Septamer 4Cat1Egc2Egcg	M	119	94	53	0	C119H94O53S0	2370.466028	[M+H]+	119	95	53	0	C119H95O53S0	2371.473304	[M-H]-	119	93	53	0	C119H93O53S0	2369.458751
267	Proanthocyanidin Polymers	Proanthocyanidin Septamer	Proanthocyanidin Septamer 4Cat2Egc1Egcg	M	112	90	49	0	C112H90O49S0	2218.455069	[M+H]+	112	91	49	0	C112H91O49S0	2219.462346	[M-H]-	112	89	49	0	C112H89O49S0	2217.447793
268	Proanthocyanidin Polymers	Proanthocyanidin Septamer	Proanthocyanidin Septamer 2Cat4Ecg1Egc	M	133	102	59	0	C133H102O59S0	2642.498116	[M+H]+	133	103	59	0	C133H103O59S0	2643.505392	[M-H]-	133	101	59	0	C133H101O59S0	2641.490839
269	Proanthocyanidin Polymers	Proanthocyanidin Septamer	Proanthocyanidin Septamer 2Cat4Ecg1Egcg	M	140	106	63	0	C140H106O63S0	2794.509074	[M+H]+	140	107	63	0	C140H107O63S0	2795.516351	[M-H]-	140	105	63	0	C140H105O63S0	2793.501798
270	Proanthocyanidin Polymers	Proanthocyanidin Septamer	Proanthocyanidin Septamer 1Cat4Ecg2Egc	M	133	102	60	0	C133H102O60S0	2658.49303	[M+H]+	133	103	60	0	C133H103O60S0	2659.500307	[M-H]-	133	101	60	0	C133H101O60S0	2657.485754
271	Proanthocyanidin Polymers	Proanthocyanidin Septamer	Proanthocyanidin Septamer 1Cat4Ecg2Egcg	M	147	110	68	0	C147H110O68S0	2962.514948	[M+H]+	147	111	68	0	C147H111O68S0	2963.522224	[M-H]-	147	109	68	0	C147H109O68S0	2961.507671
272	Proanthocyanidin Polymers	Proanthocyanidin Septamer	Proanthocyanidin Septamer 4Ecg1Egc2Egcg	M	147	110	69	0	C147H110O69S0	2978.509862	[M+H]+	147	111	69	0	C147H111O69S0	2979.517139	[M-H]-	147	109	69	0	C147H109O69S0	2977.502586
273	Proanthocyanidin Polymers	Proanthocyanidin Septamer	Proanthocyanidin Septamer 4Ecg2Egc1Egcg	M	140	106	65	0	C140H106O65S0	2826.498904	[M+H]+	140	107	65	0	C140H107O65S0	2827.50618	[M-H]-	140	105	65	0	C140H105O65S0	2825.491627
274	Proanthocyanidin Polymers	Proanthocyanidin Septamer	Proanthocyanidin Septamer 2Cat1Ecg4Egc	M	112	90	50	0	C112H90O50S0	2234.449984	[M+H]+	112	91	50	0	C112H91O50S0	2235.45726	[M-H]-	112	89	50	0	C112H89O50S0	2233.442707
275	Proanthocyanidin Polymers	Proanthocyanidin Septamer	Proanthocyanidin Septamer 2Cat4Egc1Egcg	M	112	90	51	0	C112H90O51S0	2250.444898	[M+H]+	112	91	51	0	C112H91O51S0	2251.452175	[M-H]-	112	89	51	0	C112H89O51S0	2249.437622
276	Proanthocyanidin Polymers	Proanthocyanidin Septamer	Proanthocyanidin Septamer 1Cat2Ecg4Egc	M	119	94	54	0	C119H94O54S0	2386.460942	[M+H]+	119	95	54	0	C119H95O54S0	2387.468219	[M-H]-	119	93	54	0	C119H93O54S0	2385.453666
277	Proanthocyanidin Polymers	Proanthocyanidin Septamer	Proanthocyanidin Septamer 1Cat4Egc2Egcg	M	119	94	56	0	C119H94O56S0	2418.450772	[M+H]+	119	95	56	0	C119H95O56S0	2419.458048	[M-H]-	119	93	56	0	C119H93O56S0	2417.443495
278	Proanthocyanidin Polymers	Proanthocyanidin Septamer	Proanthocyanidin Septamer 1Ecg4Egc2Egcg	M	126	98	60	0	C126H98O60S0	2570.46173	[M+H]+	126	99	60	0	C126H99O60S0	2571.469007	[M-H]-	126	97	60	0	C126H97O60S0	2569.454454
279	Proanthocyanidin Polymers	Proanthocyanidin Septamer	Proanthocyanidin Septamer 2Ecg4Egc1Egcg	M	126	98	59	0	C126H98O59S0	2554.466816	[M+H]+	126	99	59	0	C126H99O59S0	2555.474092	[M-H]-	126	97	59	0	C126H97O59S0	2553.459539
280	Proanthocyanidin Polymers	Proanthocyanidin Septamer	Proanthocyanidin Septamer 2Cat1Ecg4Egcg	M	140	106	66	0	C140H106O66S0	2842.493818	[M+H]+	140	107	66	0	C140H107O66S0	2843.501095	[M-H]-	140	105	66	0	C140H105O66S0	2841.486542
281	Proanthocyanidin Polymers	Proanthocyanidin Septamer	Proanthocyanidin Septamer 2Cat1Egc4Egcg	M	133	102	63	0	C133H102O63S0	2706.477774	[M+H]+	133	103	63	0	C133H103O63S0	2707.485051	[M-H]-	133	101	63	0	C133H101O63S0	2705.470498
282	Proanthocyanidin Polymers	Proanthocyanidin Septamer	Proanthocyanidin Septamer 1Cat2Ecg4Egcg	M	147	110	70	0	C147H110O70S0	2994.504777	[M+H]+	147	111	70	0	C147H111O70S0	2995.512053	[M-H]-	147	109	70	0	C147H109O70S0	2993.4975
283	Proanthocyanidin Polymers	Proanthocyanidin Septamer	Proanthocyanidin Septamer 1Cat2Egc4Egcg	M	133	102	64	0	C133H102O64S0	2722.472689	[M+H]+	133	103	64	0	C133H103O64S0	2723.479965	[M-H]-	133	101	64	0	C133H101O64S0	2721.465412
284	Proanthocyanidin Polymers	Proanthocyanidin Septamer	Proanthocyanidin Septamer 1Ecg2Egc4Egcg	M	140	106	68	0	C140H106O68S0	2874.483648	[M+H]+	140	107	68	0	C140H107O68S0	2875.490924	[M-H]-	140	105	68	0	C140H105O68S0	2873.476371
285	Proanthocyanidin Polymers	Proanthocyanidin Septamer	Proanthocyanidin Septamer 2Ecg1Egc4Egcg	M	147	110	71	0	C147H110O71S0	3010.499692	[M+H]+	147	111	71	0	C147H111O71S0	3011.506968	[M-H]-	147	109	71	0	C147H109O71S0	3009.492415
286	Proanthocyanidin Polymers	Proanthocyanidin Septamer	Proanthocyanidin Septamer 4Cat1Ecg1Egc1Egcg	M	119	94	52	0	C119H94O52S0	2354.471113	[M+H]+	119	95	52	0	C119H95O52S0	2355.47839	[M-H]-	119	93	52	0	C119H93O52S0	2353.463837
287	Proanthocyanidin Polymers	Proanthocyanidin Septamer	Proanthocyanidin Septamer 1Cat4Ecg1Egc1Egcg	M	140	106	64	0	C140H106O64S0	2810.503989	[M+H]+	140	107	64	0	C140H107O64S0	2811.511266	[M-H]-	140	105	64	0	C140H105O64S0	2809.496713
288	Proanthocyanidin Polymers	Proanthocyanidin Septamer	Proanthocyanidin Septamer 1Cat1Ecg4Egc1Egcg	M	119	94	55	0	C119H94O55S0	2402.455857	[M+H]+	119	95	55	0	C119H95O55S0	2403.463134	[M-H]-	119	93	55	0	C119H93O55S0	2401.448581
289	Proanthocyanidin Polymers	Proanthocyanidin Septamer	Proanthocyanidin Septamer 1Cat1Ecg1Egc4Egcg	M	140	106	67	0	C140H106O67S0	2858.488733	[M+H]+	140	107	67	0	C140H107O67S0	2859.496009	[M-H]-	140	105	67	0	C140H105O67S0	2857.481456
290	Proanthocyanidin Polymers	Proanthocyanidin Septamer	Proanthocyanidin Septamer 1Ecg3Egc3Egcg	M	133	102	64	0	C133H102O64S0	2722.472689	[M+H]+	133	103	64	0	C133H103O64S0	2723.479965	[M-H]-	133	101	64	0	C133H101O64S0	2721.465412
291	Proanthocyanidin Polymers	Proanthocyanidin Septamer	Proanthocyanidin Septamer 3Ecg1Egc3Egcg	M	147	110	70	0	C147H110O70S0	2994.504777	[M+H]+	147	111	70	0	C147H111O70S0	2995.512053	[M-H]-	147	109	70	0	C147H109O70S0	2993.4975
292	Proanthocyanidin Polymers	Proanthocyanidin Septamer	Proanthocyanidin Septamer 3Ecg3Egc1Egcg	M	133	102	62	0	C133H102O62S0	2690.48286	[M+H]+	133	103	62	0	C133H103O62S0	2691.490136	[M-H]-	133	101	62	0	C133H101O62S0	2689.475583
293	Proanthocyanidin Polymers	Proanthocyanidin Septamer	Proanthocyanidin Septamer 1Cat3Egc3Egcg	M	126	98	60	0	C126H98O60S0	2570.46173	[M+H]+	126	99	60	0	C126H99O60S0	2571.469007	[M-H]-	126	97	60	0	C126H97O60S0	2569.454454
294	Proanthocyanidin Polymers	Proanthocyanidin Septamer	Proanthocyanidin Septamer 3Cat1Egc3Egcg	M	126	98	58	0	C126H98O58S0	2538.471901	[M+H]+	126	99	58	0	C126H99O58S0	2539.479178	[M-H]-	126	97	58	0	C126H97O58S0	2537.464625
295	Proanthocyanidin Polymers	Proanthocyanidin Septamer	Proanthocyanidin Septamer 3Cat3Egc1Egcg	M	112	90	50	0	C112H90O50S0	2234.449984	[M+H]+	112	91	50	0	C112H91O50S0	2235.45726	[M-H]-	112	89	50	0	C112H89O50S0	2233.442707
296	Proanthocyanidin Polymers	Proanthocyanidin Septamer	Proanthocyanidin Septamer 1Cat3Ecg3Egcg	M	147	110	69	0	C147H110O69S0	2978.509862	[M+H]+	147	111	69	0	C147H111O69S0	2979.517139	[M-H]-	147	109	69	0	C147H109O69S0	2977.502586
297	Proanthocyanidin Polymers	Proanthocyanidin Septamer	Proanthocyanidin Septamer 3Cat1Ecg3Egcg	M	133	102	61	0	C133H102O61S0	2674.487945	[M+H]+	133	103	61	0	C133H103O61S0	2675.495222	[M-H]-	133	101	61	0	C133H101O61S0	2673.480669
298	Proanthocyanidin Polymers	Proanthocyanidin Septamer	Proanthocyanidin Septamer 3Cat3Ecg1Egcg	M	133	102	59	0	C133H102O59S0	2642.498116	[M+H]+	133	103	59	0	C133H103O59S0	2643.505392	[M-H]-	133	101	59	0	C133H101O59S0	2641.490839
299	Proanthocyanidin Polymers	Proanthocyanidin Septamer	Proanthocyanidin Septamer 1Cat3Ecg3Egc	M	126	98	57	0	C126H98O57S0	2522.476986	[M+H]+	126	99	57	0	C126H99O57S0	2523.484263	[M-H]-	126	97	57	0	C126H97O57S0	2521.46971
300	Proanthocyanidin Polymers	Proanthocyanidin Septamer	Proanthocyanidin Septamer 3Cat1Ecg3Egc	M	112	90	49	0	C112H90O49S0	2218.455069	[M+H]+	112	91	49	0	C112H91O49S0	2219.462346	[M-H]-	112	89	49	0	C112H89O49S0	2217.447793
301	Proanthocyanidin Polymers	Proanthocyanidin Septamer	Proanthocyanidin Septamer 3Cat3Ecg1Egc	M	126	98	55	0	C126H98O55S0	2490.487157	[M+H]+	126	99	55	0	C126H99O55S0	2491.494434	[M-H]-	126	97	55	0	C126H97O55S0	2489.479881
302	Proanthocyanidin Polymers	Proanthocyanidin Septamer	Proanthocyanidin Septamer 3Cat2Ecg2Egc	M	119	94	52	0	C119H94O52S0	2354.471113	[M+H]+	119	95	52	0	C119H95O52S0	2355.47839	[M-H]-	119	93	52	0	C119H93O52S0	2353.463837
303	Proanthocyanidin Polymers	Proanthocyanidin Septamer	Proanthocyanidin Septamer 3Cat2Ecg2Egcg	M	133	102	60	0	C133H102O60S0	2658.49303	[M+H]+	133	103	60	0	C133H103O60S0	2659.500307	[M-H]-	133	101	60	0	C133H101O60S0	2657.485754
304	Proanthocyanidin Polymers	Proanthocyanidin Septamer	Proanthocyanidin Septamer 3Cat2Egc2Egcg	M	119	94	54	0	C119H94O54S0	2386.460942	[M+H]+	119	95	54	0	C119H95O54S0	2387.468219	[M-H]-	119	93	54	0	C119H93O54S0	2385.453666
305	Proanthocyanidin Polymers	Proanthocyanidin Septamer	Proanthocyanidin Septamer 2Cat3Ecg2Egc	M	126	98	56	0	C126H98O56S0	2506.482072	[M+H]+	126	99	56	0	C126H99O56S0	2507.489348	[M-H]-	126	97	56	0	C126H97O56S0	2505.474795
306	Proanthocyanidin Polymers	Proanthocyanidin Septamer	Proanthocyanidin Septamer 2Cat3Ecg2Egcg	M	140	106	64	0	C140H106O64S0	2810.503989	[M+H]+	140	107	64	0	C140H107O64S0	2811.511266	[M-H]-	140	105	64	0	C140H105O64S0	2809.496713
307	Proanthocyanidin Polymers	Proanthocyanidin Septamer	Proanthocyanidin Septamer 3Ecg2Egc2Egcg	M	140	106	66	0	C140H106O66S0	2842.493818	[M+H]+	140	107	66	0	C140H107O66S0	2843.501095	[M-H]-	140	105	66	0	C140H105O66S0	2841.486542
308	Proanthocyanidin Polymers	Proanthocyanidin Septamer	Proanthocyanidin Septamer 2Cat2Ecg3Egc	M	119	94	53	0	C119H94O53S0	2370.466028	[M+H]+	119	95	53	0	C119H95O53S0	2371.473304	[M-H]-	119	93	53	0	C119H93O53S0	2369.458751
309	Proanthocyanidin Polymers	Proanthocyanidin Septamer	Proanthocyanidin Septamer 2Cat3Egc2Egcg	M	119	94	55	0	C119H94O55S0	2402.455857	[M+H]+	119	95	55	0	C119H95O55S0	2403.463134	[M-H]-	119	93	55	0	C119H93O55S0	2401.448581
310	Proanthocyanidin Polymers	Proanthocyanidin Septamer	Proanthocyanidin Septamer 2Ecg3Egc2Egcg	M	133	102	63	0	C133H102O63S0	2706.477774	[M+H]+	133	103	63	0	C133H103O63S0	2707.485051	[M-H]-	133	101	63	0	C133H101O63S0	2705.470498
311	Proanthocyanidin Polymers	Proanthocyanidin Septamer	Proanthocyanidin Septamer 2Cat2Ecg3Egcg	M	140	106	65	0	C140H106O65S0	2826.498904	[M+H]+	140	107	65	0	C140H107O65S0	2827.50618	[M-H]-	140	105	65	0	C140H105O65S0	2825.491627
312	Proanthocyanidin Polymers	Proanthocyanidin Septamer	Proanthocyanidin Septamer 2Cat2Egc3Egcg	M	126	98	59	0	C126H98O59S0	2554.466816	[M+H]+	126	99	59	0	C126H99O59S0	2555.474092	[M-H]-	126	97	59	0	C126H97O59S0	2553.459539
313	Proanthocyanidin Polymers	Proanthocyanidin Septamer	Proanthocyanidin Septamer 2Ecg2Egc3Egcg	M	140	106	67	0	C140H106O67S0	2858.488733	[M+H]+	140	107	67	0	C140H107O67S0	2859.496009	[M-H]-	140	105	67	0	C140H105O67S0	2857.481456
314	Proanthocyanidin Polymers	Proanthocyanidin Septamer	Proanthocyanidin Septamer 3Cat2Ecg1Egc1Egcg	M	126	98	56	0	C126H98O56S0	2506.482072	[M+H]+	126	99	56	0	C126H99O56S0	2507.489348	[M-H]-	126	97	56	0	C126H97O56S0	2505.474795
315	Proanthocyanidin Polymers	Proanthocyanidin Septamer	Proanthocyanidin Septamer 3Cat1Ecg2Egc1Egcg	M	119	94	53	0	C119H94O53S0	2370.466028	[M+H]+	119	95	53	0	C119H95O53S0	2371.473304	[M-H]-	119	93	53	0	C119H93O53S0	2369.458751
316	Proanthocyanidin Polymers	Proanthocyanidin Septamer	Proanthocyanidin Septamer 3Cat1Ecg1Egc2Egcg	M	126	98	57	0	C126H98O57S0	2522.476986	[M+H]+	126	99	57	0	C126H99O57S0	2523.484263	[M-H]-	126	97	57	0	C126H97O57S0	2521.46971
317	Proanthocyanidin Polymers	Proanthocyanidin Septamer	Proanthocyanidin Septamer 2Cat3Ecg1Egc1Egcg	M	133	102	60	0	C133H102O60S0	2658.49303	[M+H]+	133	103	60	0	C133H103O60S0	2659.500307	[M-H]-	133	101	60	0	C133H101O60S0	2657.485754
318	Proanthocyanidin Polymers	Proanthocyanidin Septamer	Proanthocyanidin Septamer 1Cat3Ecg2Egc1Egcg	M	133	102	61	0	C133H102O61S0	2674.487945	[M+H]+	133	103	61	0	C133H103O61S0	2675.495222	[M-H]-	133	101	61	0	C133H101O61S0	2673.480669
319	Proanthocyanidin Polymers	Proanthocyanidin Septamer	Proanthocyanidin Septamer 1Cat3Ecg1Egc2Egcg	M	140	106	65	0	C140H106O65S0	2826.498904	[M+H]+	140	107	65	0	C140H107O65S0	2827.50618	[M-H]-	140	105	65	0	C140H105O65S0	2825.491627
320	Proanthocyanidin Polymers	Proanthocyanidin Septamer	Proanthocyanidin Septamer 2Cat1Ecg3Egc1Egcg	M	119	94	54	0	C119H94O54S0	2386.460942	[M+H]+	119	95	54	0	C119H95O54S0	2387.468219	[M-H]-	119	93	54	0	C119H93O54S0	2385.453666
321	Proanthocyanidin Polymers	Proanthocyanidin Septamer	Proanthocyanidin Septamer 1Cat2Ecg3Egc1Egcg	M	126	98	58	0	C126H98O58S0	2538.471901	[M+H]+	126	99	58	0	C126H99O58S0	2539.479178	[M-H]-	126	97	58	0	C126H97O58S0	2537.464625
322	Proanthocyanidin Polymers	Proanthocyanidin Septamer	Proanthocyanidin Septamer 1Cat1Ecg3Egc2Egcg	M	126	98	59	0	C126H98O59S0	2554.466816	[M+H]+	126	99	59	0	C126H99O59S0	2555.474092	[M-H]-	126	97	59	0	C126H97O59S0	2553.459539
323	Proanthocyanidin Polymers	Proanthocyanidin Septamer	Proanthocyanidin Septamer 2Cat1Ecg1Egc3Egcg	M	133	102	62	0	C133H102O62S0	2690.48286	[M+H]+	133	103	62	0	C133H103O62S0	2691.490136	[M-H]-	133	101	62	0	C133H101O62S0	2689.475583
324	Proanthocyanidin Polymers	Proanthocyanidin Septamer	Proanthocyanidin Septamer 1Cat2Ecg1Egc3Egcg	M	140	106	66	0	C140H106O66S0	2842.493818	[M+H]+	140	107	66	0	C140H107O66S0	2843.501095	[M-H]-	140	105	66	0	C140H105O66S0	2841.486542
325	Proanthocyanidin Polymers	Proanthocyanidin Septamer	Proanthocyanidin Septamer 1Cat1Ecg2Egc3Egcg	M	133	102	63	0	C133H102O63S0	2706.477774	[M+H]+	133	103	63	0	C133H103O63S0	2707.485051	[M-H]-	133	101	63	0	C133H101O63S0	2705.470498
326	Proanthocyanidin Polymers	Proanthocyanidin Septamer	Proanthocyanidin Septamer 1Cat2Ecg2Egc2Egcg	M	133	102	62	0	C133H102O62S0	2690.48286	[M+H]+	133	103	62	0	C133H103O62S0	2691.490136	[M-H]-	133	101	62	0	C133H101O62S0	2689.475583
327	Proanthocyanidin Polymers	Proanthocyanidin Septamer	Proanthocyanidin Septamer 2Cat1Ecg2Egc2Egcg	M	126	98	58	0	C126H98O58S0	2538.471901	[M+H]+	126	99	58	0	C126H99O58S0	2539.479178	[M-H]-	126	97	58	0	C126H97O58S0	2537.464625
328	Proanthocyanidin Polymers	Proanthocyanidin Septamer	Proanthocyanidin Septamer 2Cat2Ecg1Egc2Egcg	M	133	102	61	0	C133H102O61S0	2674.487945	[M+H]+	133	103	61	0	C133H103O61S0	2675.495222	[M-H]-	133	101	61	0	C133H101O61S0	2673.480669
329	Proanthocyanidin Polymers	Proanthocyanidin Septamer	Proanthocyanidin Septamer 2Cat2Ecg2Egc1Egcg	M	126	98	57	0	C126H98O57S0	2522.476986	[M+H]+	126	99	57	0	C126H99O57S0	2523.484263	[M-H]-	126	97	57	0	C126H97O57S0	2521.46971
330	Proanthocyanidin Polymers	Proanthocyanidin Octamer	Proanthocyanidin Octamer 8Cat	M	120	98	48	0	C120H98O48S0	2306.522755	[M+H]+	120	99	48	0	C120H99O48S0	2307.530031	[M-H]-	120	97	48	0	C120H97O48S0	2305.515478
331	Proanthocyanidin Polymers	Proanthocyanidin Octamer	Proanthocyanidin Octamer 8Ecg	M	176	130	80	0	C176H130O80S0	3522.610424	[M+H]+	176	131	80	0	C176H131O80S0	3523.6177	[M-H]-	176	129	80	0	C176H129O80S0	3521.603147
332	Proanthocyanidin Polymers	Proanthocyanidin Octamer	Proanthocyanidin Octamer 8Egc	M	120	98	56	0	C120H98O56S0	2434.482072	[M+H]+	120	99	56	0	C120H99O56S0	2435.489348	[M-H]-	120	97	56	0	C120H97O56S0	2433.474795
333	Proanthocyanidin Polymers	Proanthocyanidin Octamer	Proanthocyanidin Octamer 8Egcg	M	176	130	88	0	C176H130O88S0	3650.569741	[M+H]+	176	131	88	0	C176H131O88S0	3651.577017	[M-H]-	176	129	88	0	C176H129O88S0	3649.562464
334	Proanthocyanidin Polymers	Proanthocyanidin Octamer	Proanthocyanidin Octamer 7Cat1Ecg	M	127	102	52	0	C127H102O52S0	2458.533714	[M+H]+	127	103	52	0	C127H103O52S0	2459.54099	[M-H]-	127	101	52	0	C127H101O52S0	2457.526437
335	Proanthocyanidin Polymers	Proanthocyanidin Octamer	Proanthocyanidin Octamer 7Cat1Egc	M	120	98	49	0	C120H98O49S0	2322.51767	[M+H]+	120	99	49	0	C120H99O49S0	2323.524946	[M-H]-	120	97	49	0	C120H97O49S0	2321.510393
336	Proanthocyanidin Polymers	Proanthocyanidin Octamer	Proanthocyanidin Octamer 7Cat1Egcg	M	127	102	53	0	C127H102O53S0	2474.528628	[M+H]+	127	103	53	0	C127H103O53S0	2475.535905	[M-H]-	127	101	53	0	C127H101O53S0	2473.521352
337	Proanthocyanidin Polymers	Proanthocyanidin Octamer	Proanthocyanidin Octamer 1Cat7Ecg	M	169	126	76	0	C169H126O76S0	3370.599465	[M+H]+	169	127	76	0	C169H127O76S0	3371.606742	[M-H]-	169	125	76	0	C169H125O76S0	3369.592189
338	Proanthocyanidin Polymers	Proanthocyanidin Octamer	Proanthocyanidin Octamer 7Ecg1Egc	M	169	126	77	0	C169H126O77S0	3386.59438	[M+H]+	169	127	77	0	C169H127O77S0	3387.601656	[M-H]-	169	125	77	0	C169H125O77S0	3385.587103
339	Proanthocyanidin Polymers	Proanthocyanidin Octamer	Proanthocyanidin Octamer 7Ecg1Egcg	M	176	130	81	0	C176H130O81S0	3538.605338	[M+H]+	176	131	81	0	C176H131O81S0	3539.612615	[M-H]-	176	129	81	0	C176H129O81S0	3537.598062
340	Proanthocyanidin Polymers	Proanthocyanidin Octamer	Proanthocyanidin Octamer 1Cat7Egc	M	120	98	55	0	C120H98O55S0	2418.487157	[M+H]+	120	99	55	0	C120H99O55S0	2419.494434	[M-H]-	120	97	55	0	C120H97O55S0	2417.479881
341	Proanthocyanidin Polymers	Proanthocyanidin Octamer	Proanthocyanidin Octamer 1Ecg7Egc	M	127	102	59	0	C127H102O59S0	2570.498116	[M+H]+	127	103	59	0	C127H103O59S0	2571.505392	[M-H]-	127	101	59	0	C127H101O59S0	2569.490839
342	Proanthocyanidin Polymers	Proanthocyanidin Octamer	Proanthocyanidin Octamer 7Egc1Egcg	M	127	102	60	0	C127H102O60S0	2586.49303	[M+H]+	127	103	60	0	C127H103O60S0	2587.500307	[M-H]-	127	101	60	0	C127H101O60S0	2585.485754
343	Proanthocyanidin Polymers	Proanthocyanidin Octamer	Proanthocyanidin Octamer 1Cat7Egcg	M	169	126	83	0	C169H126O83S0	3482.563867	[M+H]+	169	127	83	0	C169H127O83S0	3483.571144	[M-H]-	169	125	83	0	C169H125O83S0	3481.556591
344	Proanthocyanidin Polymers	Proanthocyanidin Octamer	Proanthocyanidin Octamer 1Ecg7Egcg	M	176	130	87	0	C176H130O87S0	3634.574826	[M+H]+	176	131	87	0	C176H131O87S0	3635.582103	[M-H]-	176	129	87	0	C176H129O87S0	3633.56755
345	Proanthocyanidin Polymers	Proanthocyanidin Octamer	Proanthocyanidin Octamer 1Egc7Egcg	M	169	126	84	0	C169H126O84S0	3498.558782	[M+H]+	169	127	84	0	C169H127O84S0	3499.566059	[M-H]-	169	125	84	0	C169H125O84S0	3497.551506
346	Proanthocyanidin Polymers	Proanthocyanidin Octamer	Proanthocyanidin Octamer 6Cat2Ecg	M	134	106	56	0	C134H106O56S0	2610.544672	[M+H]+	134	107	56	0	C134H107O56S0	2611.551949	[M-H]-	134	105	56	0	C134H105O56S0	2609.537396
347	Proanthocyanidin Polymers	Proanthocyanidin Octamer	Proanthocyanidin Octamer 6Cat2Egc	M	120	98	50	0	C120H98O50S0	2338.512584	[M+H]+	120	99	50	0	C120H99O50S0	2339.519861	[M-H]-	120	97	50	0	C120H97O50S0	2337.505308
348	Proanthocyanidin Polymers	Proanthocyanidin Octamer	Proanthocyanidin Octamer 6Cat2Egcg	M	134	106	58	0	C134H106O58S0	2642.534501	[M+H]+	134	107	58	0	C134H107O58S0	2643.541778	[M-H]-	134	105	58	0	C134H105O58S0	2641.527225
349	Proanthocyanidin Polymers	Proanthocyanidin Octamer	Proanthocyanidin Octamer 2Cat6Ecg	M	162	122	72	0	C162H122O72S0	3218.588507	[M+H]+	162	123	72	0	C162H123O72S0	3219.595783	[M-H]-	162	121	72	0	C162H121O72S0	3217.58123
350	Proanthocyanidin Polymers	Proanthocyanidin Octamer	Proanthocyanidin Octamer 6Ecg2Egc	M	162	122	74	0	C162H122O74S0	3250.578336	[M+H]+	162	123	74	0	C162H123O74S0	3251.585612	[M-H]-	162	121	74	0	C162H121O74S0	3249.571059
351	Proanthocyanidin Polymers	Proanthocyanidin Octamer	Proanthocyanidin Octamer 6Ecg2Egcg	M	176	130	82	0	C176H130O82S0	3554.600253	[M+H]+	176	131	82	0	C176H131O82S0	3555.607529	[M-H]-	176	129	82	0	C176H129O82S0	3553.592977
352	Proanthocyanidin Polymers	Proanthocyanidin Octamer	Proanthocyanidin Octamer 2Cat6Egc	M	120	98	54	0	C120H98O54S0	2402.492243	[M+H]+	120	99	54	0	C120H99O54S0	2403.499519	[M-H]-	120	97	54	0	C120H97O54S0	2401.484966
353	Proanthocyanidin Polymers	Proanthocyanidin Octamer	Proanthocyanidin Octamer 2Ecg6Egc	M	134	106	62	0	C134H106O62S0	2706.51416	[M+H]+	134	107	62	0	C134H107O62S0	2707.521436	[M-H]-	134	105	62	0	C134H105O62S0	2705.506883
354	Proanthocyanidin Polymers	Proanthocyanidin Octamer	Proanthocyanidin Octamer 6Egc2Egcg	M	134	106	64	0	C134H106O64S0	2738.503989	[M+H]+	134	107	64	0	C134H107O64S0	2739.511266	[M-H]-	134	105	64	0	C134H105O64S0	2737.496713
355	Proanthocyanidin Polymers	Proanthocyanidin Octamer	Proanthocyanidin Octamer 2Cat6Egcg	M	162	122	78	0	C162H122O78S0	3314.557994	[M+H]+	162	123	78	0	C162H123O78S0	3315.565271	[M-H]-	162	121	78	0	C162H121O78S0	3313.550718
356	Proanthocyanidin Polymers	Proanthocyanidin Octamer	Proanthocyanidin Octamer 2Ecg6Egcg	M	176	130	86	0	C176H130O86S0	3618.579911	[M+H]+	176	131	86	0	C176H131O86S0	3619.587188	[M-H]-	176	129	86	0	C176H129O86S0	3617.572635
357	Proanthocyanidin Polymers	Proanthocyanidin Octamer	Proanthocyanidin Octamer 2Egc6Egcg	M	162	122	80	0	C162H122O80S0	3346.547823	[M+H]+	162	123	80	0	C162H123O80S0	3347.5551	[M-H]-	162	121	80	0	C162H121O80S0	3345.540547
358	Proanthocyanidin Polymers	Proanthocyanidin Octamer	Proanthocyanidin Octamer 6Cat1Ecg1Egc	M	127	102	53	0	C127H102O53S0	2474.528628	[M+H]+	127	103	53	0	C127H103O53S0	2475.535905	[M-H]-	127	101	53	0	C127H101O53S0	2473.521352
359	Proanthocyanidin Polymers	Proanthocyanidin Octamer	Proanthocyanidin Octamer 6Cat1Ecg1Egcg	M	134	106	57	0	C134H106O57S0	2626.539587	[M+H]+	134	107	57	0	C134H107O57S0	2627.546863	[M-H]-	134	105	57	0	C134H105O57S0	2625.53231
360	Proanthocyanidin Polymers	Proanthocyanidin Octamer	Proanthocyanidin Octamer 6Cat1Egc1Egcg	M	127	102	54	0	C127H102O54S0	2490.523543	[M+H]+	127	103	54	0	C127H103O54S0	2491.530819	[M-H]-	127	101	54	0	C127H101O54S0	2489.516266
361	Proanthocyanidin Polymers	Proanthocyanidin Octamer	Proanthocyanidin Octamer 1Cat6Ecg1Egc	M	162	122	73	0	C162H122O73S0	3234.583421	[M+H]+	162	123	73	0	C162H123O73S0	3235.590698	[M-H]-	162	121	73	0	C162H121O73S0	3233.576145
362	Proanthocyanidin Polymers	Proanthocyanidin Octamer	Proanthocyanidin Octamer 1Cat6Ecg1Egcg	M	169	126	77	0	C169H126O77S0	3386.59438	[M+H]+	169	127	77	0	C169H127O77S0	3387.601656	[M-H]-	169	125	77	0	C169H125O77S0	3385.587103
363	Proanthocyanidin Polymers	Proanthocyanidin Octamer	Proanthocyanidin Octamer 6Ecg1Egc1Egcg	M	169	126	78	0	C169H126O78S0	3402.589294	[M+H]+	169	127	78	0	C169H127O78S0	3403.596571	[M-H]-	169	125	78	0	C169H125O78S0	3401.582018
364	Proanthocyanidin Polymers	Proanthocyanidin Octamer	Proanthocyanidin Octamer 1Cat1Ecg6Egc	M	127	102	58	0	C127H102O58S0	2554.503201	[M+H]+	127	103	58	0	C127H103O58S0	2555.510478	[M-H]-	127	101	58	0	C127H101O58S0	2553.495925
365	Proanthocyanidin Polymers	Proanthocyanidin Octamer	Proanthocyanidin Octamer 1Cat6Egc1Egcg	M	127	102	59	0	C127H102O59S0	2570.498116	[M+H]+	127	103	59	0	C127H103O59S0	2571.505392	[M-H]-	127	101	59	0	C127H101O59S0	2569.490839
366	Proanthocyanidin Polymers	Proanthocyanidin Octamer	Proanthocyanidin Octamer 1Ecg6Egc1Egcg	M	134	106	63	0	C134H106O63S0	2722.509074	[M+H]+	134	107	63	0	C134H107O63S0	2723.516351	[M-H]-	134	105	63	0	C134H105O63S0	2721.501798
367	Proanthocyanidin Polymers	Proanthocyanidin Octamer	Proanthocyanidin Octamer 1Cat1Ecg6Egcg	M	169	126	82	0	C169H126O82S0	3466.568953	[M+H]+	169	127	82	0	C169H127O82S0	3467.576229	[M-H]-	169	125	82	0	C169H125O82S0	3465.561676
368	Proanthocyanidin Polymers	Proanthocyanidin Octamer	Proanthocyanidin Octamer 1Cat1Egc6Egcg	M	162	122	79	0	C162H122O79S0	3330.552909	[M+H]+	162	123	79	0	C162H123O79S0	3331.560185	[M-H]-	162	121	79	0	C162H121O79S0	3329.545632
369	Proanthocyanidin Polymers	Proanthocyanidin Octamer	Proanthocyanidin Octamer 1Ecg1Egc6Egcg	M	169	126	83	0	C169H126O83S0	3482.563867	[M+H]+	169	127	83	0	C169H127O83S0	3483.571144	[M-H]-	169	125	83	0	C169H125O83S0	3481.556591
370	Proanthocyanidin Polymers	Proanthocyanidin Octamer	Proanthocyanidin Octamer 5Cat3Ecg	M	141	110	60	0	C141H110O60S0	2762.555631	[M+H]+	141	111	60	0	C141H111O60S0	2763.562907	[M-H]-	141	109	60	0	C141H109O60S0	2761.548354
371	Proanthocyanidin Polymers	Proanthocyanidin Octamer	Proanthocyanidin Octamer 5Cat3Egc	M	120	98	51	0	C120H98O51S0	2354.507499	[M+H]+	120	99	51	0	C120H99O51S0	2355.514775	[M-H]-	120	97	51	0	C120H97O51S0	2353.500222
372	Proanthocyanidin Polymers	Proanthocyanidin Octamer	Proanthocyanidin Octamer 5Cat3Egcg	M	141	110	63	0	C141H110O63S0	2810.540375	[M+H]+	141	111	63	0	C141H111O63S0	2811.547651	[M-H]-	141	109	63	0	C141H109O63S0	2809.533098
373	Proanthocyanidin Polymers	Proanthocyanidin Octamer	Proanthocyanidin Octamer 3Cat5Ecg	M	155	118	68	0	C155H118O68S0	3066.577548	[M+H]+	155	119	68	0	C155H119O68S0	3067.584824	[M-H]-	155	117	68	0	C155H117O68S0	3065.570271
374	Proanthocyanidin Polymers	Proanthocyanidin Octamer	Proanthocyanidin Octamer 5Ecg3Egc	M	155	118	71	0	C155H118O71S0	3114.562292	[M+H]+	155	119	71	0	C155H119O71S0	3115.569568	[M-H]-	155	117	71	0	C155H117O71S0	3113.555015
375	Proanthocyanidin Polymers	Proanthocyanidin Octamer	Proanthocyanidin Octamer 5Ecg3Egcg	M	176	130	83	0	C176H130O83S0	3570.595168	[M+H]+	176	131	83	0	C176H131O83S0	3571.602444	[M-H]-	176	129	83	0	C176H129O83S0	3569.587891
376	Proanthocyanidin Polymers	Proanthocyanidin Octamer	Proanthocyanidin Octamer 3Cat5Egc	M	120	98	53	0	C120H98O53S0	2386.497328	[M+H]+	120	99	53	0	C120H99O53S0	2387.504604	[M-H]-	120	97	53	0	C120H97O53S0	2385.490052
377	Proanthocyanidin Polymers	Proanthocyanidin Octamer	Proanthocyanidin Octamer 3Ecg5Egc	M	141	110	65	0	C141H110O65S0	2842.530204	[M+H]+	141	111	65	0	C141H111O65S0	2843.53748	[M-H]-	141	109	65	0	C141H109O65S0	2841.522927
378	Proanthocyanidin Polymers	Proanthocyanidin Octamer	Proanthocyanidin Octamer 5Egc3Egcg	M	141	110	68	0	C141H110O68S0	2890.514948	[M+H]+	141	111	68	0	C141H111O68S0	2891.522224	[M-H]-	141	109	68	0	C141H109O68S0	2889.507671
379	Proanthocyanidin Polymers	Proanthocyanidin Octamer	Proanthocyanidin Octamer 3Cat5Egcg	M	155	118	73	0	C155H118O73S0	3146.552121	[M+H]+	155	119	73	0	C155H119O73S0	3147.559397	[M-H]-	155	117	73	0	C155H117O73S0	3145.544845
380	Proanthocyanidin Polymers	Proanthocyanidin Octamer	Proanthocyanidin Octamer 3Ecg5Egcg	M	176	130	85	0	C176H130O85S0	3602.584997	[M+H]+	176	131	85	0	C176H131O85S0	3603.592273	[M-H]-	176	129	85	0	C176H129O85S0	3601.57772
381	Proanthocyanidin Polymers	Proanthocyanidin Octamer	Proanthocyanidin Octamer 3Egc5Egcg	M	155	118	76	0	C155H118O76S0	3194.536865	[M+H]+	155	119	76	0	C155H119O76S0	3195.544141	[M-H]-	155	117	76	0	C155H117O76S0	3193.529588
382	Proanthocyanidin Polymers	Proanthocyanidin Octamer	Proanthocyanidin Octamer 5Cat2Ecg1Egc	M	134	106	57	0	C134H106O57S0	2626.539587	[M+H]+	134	107	57	0	C134H107O57S0	2627.546863	[M-H]-	134	105	57	0	C134H105O57S0	2625.53231
383	Proanthocyanidin Polymers	Proanthocyanidin Octamer	Proanthocyanidin Octamer 5Cat2Ecg1Egcg	M	141	110	61	0	C141H110O61S0	2778.550545	[M+H]+	141	111	61	0	C141H111O61S0	2779.557822	[M-H]-	141	109	61	0	C141H109O61S0	2777.543269
384	Proanthocyanidin Polymers	Proanthocyanidin Octamer	Proanthocyanidin Octamer 5Cat1Ecg2Egc	M	127	102	54	0	C127H102O54S0	2490.523543	[M+H]+	127	103	54	0	C127H103O54S0	2491.530819	[M-H]-	127	101	54	0	C127H101O54S0	2489.516266
385	Proanthocyanidin Polymers	Proanthocyanidin Octamer	Proanthocyanidin Octamer 5Cat1Ecg2Egcg	M	141	110	62	0	C141H110O62S0	2794.54546	[M+H]+	141	111	62	0	C141H111O62S0	2795.552736	[M-H]-	141	109	62	0	C141H109O62S0	2793.538184
386	Proanthocyanidin Polymers	Proanthocyanidin Octamer	Proanthocyanidin Octamer 5Cat1Egc2Egcg	M	134	106	59	0	C134H106O59S0	2658.529416	[M+H]+	134	107	59	0	C134H107O59S0	2659.536692	[M-H]-	134	105	59	0	C134H105O59S0	2657.52214
387	Proanthocyanidin Polymers	Proanthocyanidin Octamer	Proanthocyanidin Octamer 5Cat2Egc1Egcg	M	127	102	55	0	C127H102O55S0	2506.518457	[M+H]+	127	103	55	0	C127H103O55S0	2507.525734	[M-H]-	127	101	55	0	C127H101O55S0	2505.511181
388	Proanthocyanidin Polymers	Proanthocyanidin Octamer	Proanthocyanidin Octamer 2Cat5Ecg1Egc	M	155	118	69	0	C155H118O69S0	3082.572463	[M+H]+	155	119	69	0	C155H119O69S0	3083.579739	[M-H]-	155	117	69	0	C155H117O69S0	3081.565186
389	Proanthocyanidin Polymers	Proanthocyanidin Octamer	Proanthocyanidin Octamer 2Cat5Ecg1Egcg	M	162	122	73	0	C162H122O73S0	3234.583421	[M+H]+	162	123	73	0	C162H123O73S0	3235.590698	[M-H]-	162	121	73	0	C162H121O73S0	3233.576145
390	Proanthocyanidin Polymers	Proanthocyanidin Octamer	Proanthocyanidin Octamer 1Cat5Ecg2Egc	M	155	118	70	0	C155H118O70S0	3098.567377	[M+H]+	155	119	70	0	C155H119O70S0	3099.574654	[M-H]-	155	117	70	0	C155H117O70S0	3097.560101
391	Proanthocyanidin Polymers	Proanthocyanidin Octamer	Proanthocyanidin Octamer 1Cat5Ecg2Egcg	M	169	126	78	0	C169H126O78S0	3402.589294	[M+H]+	169	127	78	0	C169H127O78S0	3403.596571	[M-H]-	169	125	78	0	C169H125O78S0	3401.582018
392	Proanthocyanidin Polymers	Proanthocyanidin Octamer	Proanthocyanidin Octamer 5Ecg1Egc2Egcg	M	169	126	79	0	C169H126O79S0	3418.584209	[M+H]+	169	127	79	0	C169H127O79S0	3419.591485	[M-H]-	169	125	79	0	C169H125O79S0	3417.576933
393	Proanthocyanidin Polymers	Proanthocyanidin Octamer	Proanthocyanidin Octamer 5Ecg2Egc1Egcg	M	162	122	75	0	C162H122O75S0	3266.57325	[M+H]+	162	123	75	0	C162H123O75S0	3267.580527	[M-H]-	162	121	75	0	C162H121O75S0	3265.565974
394	Proanthocyanidin Polymers	Proanthocyanidin Octamer	Proanthocyanidin Octamer 2Cat1Ecg5Egc	M	127	102	57	0	C127H102O57S0	2538.508287	[M+H]+	127	103	57	0	C127H103O57S0	2539.515563	[M-H]-	127	101	57	0	C127H101O57S0	2537.50101
395	Proanthocyanidin Polymers	Proanthocyanidin Octamer	Proanthocyanidin Octamer 2Cat5Egc1Egcg	M	127	102	58	0	C127H102O58S0	2554.503201	[M+H]+	127	103	58	0	C127H103O58S0	2555.510478	[M-H]-	127	101	58	0	C127H101O58S0	2553.495925
396	Proanthocyanidin Polymers	Proanthocyanidin Octamer	Proanthocyanidin Octamer 1Cat2Ecg5Egc	M	134	106	61	0	C134H106O61S0	2690.519245	[M+H]+	134	107	61	0	C134H107O61S0	2691.526522	[M-H]-	134	105	61	0	C134H105O61S0	2689.511969
397	Proanthocyanidin Polymers	Proanthocyanidin Octamer	Proanthocyanidin Octamer 1Cat5Egc2Egcg	M	134	106	63	0	C134H106O63S0	2722.509074	[M+H]+	134	107	63	0	C134H107O63S0	2723.516351	[M-H]-	134	105	63	0	C134H105O63S0	2721.501798
398	Proanthocyanidin Polymers	Proanthocyanidin Octamer	Proanthocyanidin Octamer 1Ecg5Egc2Egcg	M	141	110	67	0	C141H110O67S0	2874.520033	[M+H]+	141	111	67	0	C141H111O67S0	2875.52731	[M-H]-	141	109	67	0	C141H109O67S0	2873.512757
399	Proanthocyanidin Polymers	Proanthocyanidin Octamer	Proanthocyanidin Octamer 2Ecg5Egc1Egcg	M	141	110	66	0	C141H110O66S0	2858.525118	[M+H]+	141	111	66	0	C141H111O66S0	2859.532395	[M-H]-	141	109	66	0	C141H109O66S0	2857.517842
400	Proanthocyanidin Polymers	Proanthocyanidin Octamer	Proanthocyanidin Octamer 2Cat1Ecg5Egcg	M	162	122	77	0	C162H122O77S0	3298.56308	[M+H]+	162	123	77	0	C162H123O77S0	3299.570356	[M-H]-	162	121	77	0	C162H121O77S0	3297.555803
401	Proanthocyanidin Polymers	Proanthocyanidin Octamer	Proanthocyanidin Octamer 2Cat1Egc5Egcg	M	155	118	74	0	C155H118O74S0	3162.547036	[M+H]+	155	119	74	0	C155H119O74S0	3163.554312	[M-H]-	155	117	74	0	C155H117O74S0	3161.539759
402	Proanthocyanidin Polymers	Proanthocyanidin Octamer	Proanthocyanidin Octamer 1Cat2Ecg5Egcg	M	169	126	81	0	C169H126O81S0	3450.574038	[M+H]+	169	127	81	0	C169H127O81S0	3451.581315	[M-H]-	169	125	81	0	C169H125O81S0	3449.566762
403	Proanthocyanidin Polymers	Proanthocyanidin Octamer	Proanthocyanidin Octamer 1Cat2Egc5Egcg	M	155	118	75	0	C155H118O75S0	3178.54195	[M+H]+	155	119	75	0	C155H119O75S0	3179.549227	[M-H]-	155	117	75	0	C155H117O75S0	3177.534674
404	Proanthocyanidin Polymers	Proanthocyanidin Octamer	Proanthocyanidin Octamer 1Ecg2Egc5Egcg	M	162	122	79	0	C162H122O79S0	3330.552909	[M+H]+	162	123	79	0	C162H123O79S0	3331.560185	[M-H]-	162	121	79	0	C162H121O79S0	3329.545632
405	Proanthocyanidin Polymers	Proanthocyanidin Octamer	Proanthocyanidin Octamer 2Ecg1Egc5Egcg	M	169	126	82	0	C169H126O82S0	3466.568953	[M+H]+	169	127	82	0	C169H127O82S0	3467.576229	[M-H]-	169	125	82	0	C169H125O82S0	3465.561676
406	Proanthocyanidin Polymers	Proanthocyanidin Octamer	Proanthocyanidin Octamer 5Cat1Ecg1Egc1Egcg	M	134	106	58	0	C134H106O58S0	2642.534501	[M+H]+	134	107	58	0	C134H107O58S0	2643.541778	[M-H]-	134	105	58	0	C134H105O58S0	2641.527225
407	Proanthocyanidin Polymers	Proanthocyanidin Octamer	Proanthocyanidin Octamer 1Cat5Ecg1Egc1Egcg	M	162	122	74	0	C162H122O74S0	3250.578336	[M+H]+	162	123	74	0	C162H123O74S0	3251.585612	[M-H]-	162	121	74	0	C162H121O74S0	3249.571059
408	Proanthocyanidin Polymers	Proanthocyanidin Octamer	Proanthocyanidin Octamer 1Cat1Ecg5Egc1Egcg	M	134	106	62	0	C134H106O62S0	2706.51416	[M+H]+	134	107	62	0	C134H107O62S0	2707.521436	[M-H]-	134	105	62	0	C134H105O62S0	2705.506883
409	Proanthocyanidin Polymers	Proanthocyanidin Octamer	Proanthocyanidin Octamer 1Cat1Ecg1Egc5Egcg	M	162	122	78	0	C162H122O78S0	3314.557994	[M+H]+	162	123	78	0	C162H123O78S0	3315.565271	[M-H]-	162	121	78	0	C162H121O78S0	3313.550718
410	Proanthocyanidin Polymers	Proanthocyanidin Octamer	Proanthocyanidin Octamer 4Cat4Ecg	M	148	114	64	0	C148H114O64S0	2914.566589	[M+H]+	148	115	64	0	C148H115O64S0	2915.573866	[M-H]-	148	113	64	0	C148H113O64S0	2913.559313
411	Proanthocyanidin Polymers	Proanthocyanidin Octamer	Proanthocyanidin Octamer 4Cat4Egc	M	120	98	52	0	C120H98O52S0	2370.502413	[M+H]+	120	99	52	0	C120H99O52S0	2371.50969	[M-H]-	120	97	52	0	C120H97O52S0	2369.495137
412	Proanthocyanidin Polymers	Proanthocyanidin Octamer	Proanthocyanidin Octamer 4Cat4Egcg	M	148	114	68	0	C148H114O68S0	2978.546248	[M+H]+	148	115	68	0	C148H115O68S0	2979.553524	[M-H]-	148	113	68	0	C148H113O68S0	2977.538971
413	Proanthocyanidin Polymers	Proanthocyanidin Octamer	Proanthocyanidin Octamer 4Ecg4Egc	M	148	114	68	0	C148H114O68S0	2978.546248	[M+H]+	148	115	68	0	C148H115O68S0	2979.553524	[M-H]-	148	113	68	0	C148H113O68S0	2977.538971
414	Proanthocyanidin Polymers	Proanthocyanidin Octamer	Proanthocyanidin Octamer 4Ecg4Egcg	M	176	130	84	0	C176H130O84S0	3586.590082	[M+H]+	176	131	84	0	C176H131O84S0	3587.597359	[M-H]-	176	129	84	0	C176H129O84S0	3585.582806
415	Proanthocyanidin Polymers	Proanthocyanidin Octamer	Proanthocyanidin Octamer 4Egc4Egcg	M	148	114	72	0	C148H114O72S0	3042.525906	[M+H]+	148	115	72	0	C148H115O72S0	3043.533183	[M-H]-	148	113	72	0	C148H113O72S0	3041.51863
416	Proanthocyanidin Polymers	Proanthocyanidin Octamer	Proanthocyanidin Octamer 4Cat3Ecg1Egc	M	141	110	61	0	C141H110O61S0	2778.550545	[M+H]+	141	111	61	0	C141H111O61S0	2779.557822	[M-H]-	141	109	61	0	C141H109O61S0	2777.543269
417	Proanthocyanidin Polymers	Proanthocyanidin Octamer	Proanthocyanidin Octamer 4Cat3Ecg1Egcg	M	148	114	65	0	C148H114O65S0	2930.561504	[M+H]+	148	115	65	0	C148H115O65S0	2931.56878	[M-H]-	148	113	65	0	C148H113O65S0	2929.554227
418	Proanthocyanidin Polymers	Proanthocyanidin Octamer	Proanthocyanidin Octamer 4Cat1Ecg3Egc	M	127	102	55	0	C127H102O55S0	2506.518457	[M+H]+	127	103	55	0	C127H103O55S0	2507.525734	[M-H]-	127	101	55	0	C127H101O55S0	2505.511181
419	Proanthocyanidin Polymers	Proanthocyanidin Octamer	Proanthocyanidin Octamer 4Cat1Ecg3Egcg	M	148	114	67	0	C148H114O67S0	2962.551333	[M+H]+	148	115	67	0	C148H115O67S0	2963.55861	[M-H]-	148	113	67	0	C148H113O67S0	2961.544057
420	Proanthocyanidin Polymers	Proanthocyanidin Octamer	Proanthocyanidin Octamer 4Cat1Egc3Egcg	M	141	110	64	0	C141H110O64S0	2826.535289	[M+H]+	141	111	64	0	C141H111O64S0	2827.542566	[M-H]-	141	109	64	0	C141H109O64S0	2825.528013
421	Proanthocyanidin Polymers	Proanthocyanidin Octamer	Proanthocyanidin Octamer 4Cat3Egc1Egcg	M	127	102	56	0	C127H102O56S0	2522.513372	[M+H]+	127	103	56	0	C127H103O56S0	2523.520648	[M-H]-	127	101	56	0	C127H101O56S0	2521.506096
422	Proanthocyanidin Polymers	Proanthocyanidin Octamer	Proanthocyanidin Octamer 3Cat4Ecg1Egc	M	148	114	65	0	C148H114O65S0	2930.561504	[M+H]+	148	115	65	0	C148H115O65S0	2931.56878	[M-H]-	148	113	65	0	C148H113O65S0	2929.554227
423	Proanthocyanidin Polymers	Proanthocyanidin Octamer	Proanthocyanidin Octamer 3Cat4Ecg1Egcg	M	155	118	69	0	C155H118O69S0	3082.572463	[M+H]+	155	119	69	0	C155H119O69S0	3083.579739	[M-H]-	155	117	69	0	C155H117O69S0	3081.565186
424	Proanthocyanidin Polymers	Proanthocyanidin Octamer	Proanthocyanidin Octamer 1Cat4Ecg3Egc	M	148	114	67	0	C148H114O67S0	2962.551333	[M+H]+	148	115	67	0	C148H115O67S0	2963.55861	[M-H]-	148	113	67	0	C148H113O67S0	2961.544057
425	Proanthocyanidin Polymers	Proanthocyanidin Octamer	Proanthocyanidin Octamer 1Cat4Ecg3Egcg	M	169	126	79	0	C169H126O79S0	3418.584209	[M+H]+	169	127	79	0	C169H127O79S0	3419.591485	[M-H]-	169	125	79	0	C169H125O79S0	3417.576933
426	Proanthocyanidin Polymers	Proanthocyanidin Octamer	Proanthocyanidin Octamer 4Ecg1Egc3Egcg	M	169	126	80	0	C169H126O80S0	3434.579124	[M+H]+	169	127	80	0	C169H127O80S0	3435.5864	[M-H]-	169	125	80	0	C169H125O80S0	3433.571847
427	Proanthocyanidin Polymers	Proanthocyanidin Octamer	Proanthocyanidin Octamer 4Ecg3Egc1Egcg	M	155	118	72	0	C155H118O72S0	3130.557206	[M+H]+	155	119	72	0	C155H119O72S0	3131.564483	[M-H]-	155	117	72	0	C155H117O72S0	3129.54993
428	Proanthocyanidin Polymers	Proanthocyanidin Octamer	Proanthocyanidin Octamer 3Cat1Ecg4Egc	M	127	102	56	0	C127H102O56S0	2522.513372	[M+H]+	127	103	56	0	C127H103O56S0	2523.520648	[M-H]-	127	101	56	0	C127H101O56S0	2521.506096
429	Proanthocyanidin Polymers	Proanthocyanidin Octamer	Proanthocyanidin Octamer 3Cat4Egc1Egcg	M	127	102	57	0	C127H102O57S0	2538.508287	[M+H]+	127	103	57	0	C127H103O57S0	2539.515563	[M-H]-	127	101	57	0	C127H101O57S0	2537.50101
430	Proanthocyanidin Polymers	Proanthocyanidin Octamer	Proanthocyanidin Octamer 1Cat3Ecg4Egc	M	141	110	64	0	C141H110O64S0	2826.535289	[M+H]+	141	111	64	0	C141H111O64S0	2827.542566	[M-H]-	141	109	64	0	C141H109O64S0	2825.528013
431	Proanthocyanidin Polymers	Proanthocyanidin Octamer	Proanthocyanidin Octamer 1Cat4Egc3Egcg	M	141	110	67	0	C141H110O67S0	2874.520033	[M+H]+	141	111	67	0	C141H111O67S0	2875.52731	[M-H]-	141	109	67	0	C141H109O67S0	2873.512757
432	Proanthocyanidin Polymers	Proanthocyanidin Octamer	Proanthocyanidin Octamer 1Ecg4Egc3Egcg	M	148	114	71	0	C148H114O71S0	3026.530992	[M+H]+	148	115	71	0	C148H115O71S0	3027.538268	[M-H]-	148	113	71	0	C148H113O71S0	3025.523715
433	Proanthocyanidin Polymers	Proanthocyanidin Octamer	Proanthocyanidin Octamer 3Ecg4Egc1Egcg	M	148	114	69	0	C148H114O69S0	2994.541162	[M+H]+	148	115	69	0	C148H115O69S0	2995.548439	[M-H]-	148	113	69	0	C148H113O69S0	2993.533886
434	Proanthocyanidin Polymers	Proanthocyanidin Octamer	Proanthocyanidin Octamer 3Cat1Ecg4Egcg	M	155	118	72	0	C155H118O72S0	3130.557206	[M+H]+	155	119	72	0	C155H119O72S0	3131.564483	[M-H]-	155	117	72	0	C155H117O72S0	3129.54993
435	Proanthocyanidin Polymers	Proanthocyanidin Octamer	Proanthocyanidin Octamer 3Cat1Egc4Egcg	M	148	114	69	0	C148H114O69S0	2994.541162	[M+H]+	148	115	69	0	C148H115O69S0	2995.548439	[M-H]-	148	113	69	0	C148H113O69S0	2993.533886
436	Proanthocyanidin Polymers	Proanthocyanidin Octamer	Proanthocyanidin Octamer 1Cat3Ecg4Egcg	M	169	126	80	0	C169H126O80S0	3434.579124	[M+H]+	169	127	80	0	C169H127O80S0	3435.5864	[M-H]-	169	125	80	0	C169H125O80S0	3433.571847
437	Proanthocyanidin Polymers	Proanthocyanidin Octamer	Proanthocyanidin Octamer 1Cat3Egc4Egcg	M	148	114	71	0	C148H114O71S0	3026.530992	[M+H]+	148	115	71	0	C148H115O71S0	3027.538268	[M-H]-	148	113	71	0	C148H113O71S0	3025.523715
438	Proanthocyanidin Polymers	Proanthocyanidin Octamer	Proanthocyanidin Octamer 1Ecg3Egc4Egcg	M	155	118	75	0	C155H118O75S0	3178.54195	[M+H]+	155	119	75	0	C155H119O75S0	3179.549227	[M-H]-	155	117	75	0	C155H117O75S0	3177.534674
439	Proanthocyanidin Polymers	Proanthocyanidin Octamer	Proanthocyanidin Octamer 3Ecg1Egc4Egcg	M	169	126	81	0	C169H126O81S0	3450.574038	[M+H]+	169	127	81	0	C169H127O81S0	3451.581315	[M-H]-	169	125	81	0	C169H125O81S0	3449.566762
440	Proanthocyanidin Polymers	Proanthocyanidin Octamer	Proanthocyanidin Octamer 4Cat2Ecg2Egc	M	134	106	58	0	C134H106O58S0	2642.534501	[M+H]+	134	107	58	0	C134H107O58S0	2643.541778	[M-H]-	134	105	58	0	C134H105O58S0	2641.527225
441	Proanthocyanidin Polymers	Proanthocyanidin Octamer	Proanthocyanidin Octamer 4Cat2Ecg2Egcg	M	148	114	66	0	C148H114O66S0	2946.556419	[M+H]+	148	115	66	0	C148H115O66S0	2947.563695	[M-H]-	148	113	66	0	C148H113O66S0	2945.549142
442	Proanthocyanidin Polymers	Proanthocyanidin Octamer	Proanthocyanidin Octamer 4Cat2Egc2Egcg	M	134	106	60	0	C134H106O60S0	2674.524331	[M+H]+	134	107	60	0	C134H107O60S0	2675.531607	[M-H]-	134	105	60	0	C134H105O60S0	2673.517054
443	Proanthocyanidin Polymers	Proanthocyanidin Octamer	Proanthocyanidin Octamer 2Cat4Ecg2Egc	M	148	114	66	0	C148H114O66S0	2946.556419	[M+H]+	148	115	66	0	C148H115O66S0	2947.563695	[M-H]-	148	113	66	0	C148H113O66S0	2945.549142
444	Proanthocyanidin Polymers	Proanthocyanidin Octamer	Proanthocyanidin Octamer 2Cat4Ecg2Egcg	M	162	122	74	0	C162H122O74S0	3250.578336	[M+H]+	162	123	74	0	C162H123O74S0	3251.585612	[M-H]-	162	121	74	0	C162H121O74S0	3249.571059
445	Proanthocyanidin Polymers	Proanthocyanidin Octamer	Proanthocyanidin Octamer 4Ecg2Egc2Egcg	M	162	122	76	0	C162H122O76S0	3282.568165	[M+H]+	162	123	76	0	C162H123O76S0	3283.575441	[M-H]-	162	121	76	0	C162H121O76S0	3281.560889
446	Proanthocyanidin Polymers	Proanthocyanidin Octamer	Proanthocyanidin Octamer 2Cat2Ecg4Egc	M	134	106	60	0	C134H106O60S0	2674.524331	[M+H]+	134	107	60	0	C134H107O60S0	2675.531607	[M-H]-	134	105	60	0	C134H105O60S0	2673.517054
447	Proanthocyanidin Polymers	Proanthocyanidin Octamer	Proanthocyanidin Octamer 2Cat4Egc2Egcg	M	134	106	62	0	C134H106O62S0	2706.51416	[M+H]+	134	107	62	0	C134H107O62S0	2707.521436	[M-H]-	134	105	62	0	C134H105O62S0	2705.506883
448	Proanthocyanidin Polymers	Proanthocyanidin Octamer	Proanthocyanidin Octamer 2Ecg4Egc2Egcg	M	148	114	70	0	C148H114O70S0	3010.536077	[M+H]+	148	115	70	0	C148H115O70S0	3011.543353	[M-H]-	148	113	70	0	C148H113O70S0	3009.528801
449	Proanthocyanidin Polymers	Proanthocyanidin Octamer	Proanthocyanidin Octamer 2Cat2Ecg4Egcg	M	162	122	76	0	C162H122O76S0	3282.568165	[M+H]+	162	123	76	0	C162H123O76S0	3283.575441	[M-H]-	162	121	76	0	C162H121O76S0	3281.560889
450	Proanthocyanidin Polymers	Proanthocyanidin Octamer	Proanthocyanidin Octamer 2Cat2Egc4Egcg	M	148	114	70	0	C148H114O70S0	3010.536077	[M+H]+	148	115	70	0	C148H115O70S0	3011.543353	[M-H]-	148	113	70	0	C148H113O70S0	3009.528801
451	Proanthocyanidin Polymers	Proanthocyanidin Octamer	Proanthocyanidin Octamer 2Ecg2Egc4Egcg	M	162	122	78	0	C162H122O78S0	3314.557994	[M+H]+	162	123	78	0	C162H123O78S0	3315.565271	[M-H]-	162	121	78	0	C162H121O78S0	3313.550718
452	Proanthocyanidin Polymers	Proanthocyanidin Octamer	Proanthocyanidin Octamer 4Cat2Ecg1Egc1Egcg	M	141	110	62	0	C141H110O62S0	2794.54546	[M+H]+	141	111	62	0	C141H111O62S0	2795.552736	[M-H]-	141	109	62	0	C141H109O62S0	2793.538184
453	Proanthocyanidin Polymers	Proanthocyanidin Octamer	Proanthocyanidin Octamer 4Cat1Ecg2Egc1Egcg	M	134	106	59	0	C134H106O59S0	2658.529416	[M+H]+	134	107	59	0	C134H107O59S0	2659.536692	[M-H]-	134	105	59	0	C134H105O59S0	2657.52214
454	Proanthocyanidin Polymers	Proanthocyanidin Octamer	Proanthocyanidin Octamer 4Cat1Ecg1Egc2Egcg	M	141	110	63	0	C141H110O63S0	2810.540375	[M+H]+	141	111	63	0	C141H111O63S0	2811.547651	[M-H]-	141	109	63	0	C141H109O63S0	2809.533098
455	Proanthocyanidin Polymers	Proanthocyanidin Octamer	Proanthocyanidin Octamer 2Cat4Ecg1Egc1Egcg	M	155	118	70	0	C155H118O70S0	3098.567377	[M+H]+	155	119	70	0	C155H119O70S0	3099.574654	[M-H]-	155	117	70	0	C155H117O70S0	3097.560101
456	Proanthocyanidin Polymers	Proanthocyanidin Octamer	Proanthocyanidin Octamer 1Cat4Ecg2Egc1Egcg	M	155	118	71	0	C155H118O71S0	3114.562292	[M+H]+	155	119	71	0	C155H119O71S0	3115.569568	[M-H]-	155	117	71	0	C155H117O71S0	3113.555015
457	Proanthocyanidin Polymers	Proanthocyanidin Octamer	Proanthocyanidin Octamer 1Cat4Ecg1Egc2Egcg	M	162	122	75	0	C162H122O75S0	3266.57325	[M+H]+	162	123	75	0	C162H123O75S0	3267.580527	[M-H]-	162	121	75	0	C162H121O75S0	3265.565974
458	Proanthocyanidin Polymers	Proanthocyanidin Octamer	Proanthocyanidin Octamer 2Cat1Ecg4Egc1Egcg	M	134	106	61	0	C134H106O61S0	2690.519245	[M+H]+	134	107	61	0	C134H107O61S0	2691.526522	[M-H]-	134	105	61	0	C134H105O61S0	2689.511969
459	Proanthocyanidin Polymers	Proanthocyanidin Octamer	Proanthocyanidin Octamer 1Cat2Ecg4Egc1Egcg	M	141	110	65	0	C141H110O65S0	2842.530204	[M+H]+	141	111	65	0	C141H111O65S0	2843.53748	[M-H]-	141	109	65	0	C141H109O65S0	2841.522927
460	Proanthocyanidin Polymers	Proanthocyanidin Octamer	Proanthocyanidin Octamer 1Cat1Ecg4Egc2Egcg	M	141	110	66	0	C141H110O66S0	2858.525118	[M+H]+	141	111	66	0	C141H111O66S0	2859.532395	[M-H]-	141	109	66	0	C141H109O66S0	2857.517842
461	Proanthocyanidin Polymers	Proanthocyanidin Octamer	Proanthocyanidin Octamer 2Cat1Ecg1Egc4Egcg	M	155	118	73	0	C155H118O73S0	3146.552121	[M+H]+	155	119	73	0	C155H119O73S0	3147.559397	[M-H]-	155	117	73	0	C155H117O73S0	3145.544845
462	Proanthocyanidin Polymers	Proanthocyanidin Octamer	Proanthocyanidin Octamer 1Cat2Ecg1Egc4Egcg	M	162	122	77	0	C162H122O77S0	3298.56308	[M+H]+	162	123	77	0	C162H123O77S0	3299.570356	[M-H]-	162	121	77	0	C162H121O77S0	3297.555803
463	Proanthocyanidin Polymers	Proanthocyanidin Octamer	Proanthocyanidin Octamer 1Cat1Ecg2Egc4Egcg	M	155	118	74	0	C155H118O74S0	3162.547036	[M+H]+	155	119	74	0	C155H119O74S0	3163.554312	[M-H]-	155	117	74	0	C155H117O74S0	3161.539759
464	Proanthocyanidin Polymers	Proanthocyanidin Octamer	Proanthocyanidin Octamer 2Ecg3Egc3Egcg	M	155	118	74	0	C155H118O74S0	3162.547036	[M+H]+	155	119	74	0	C155H119O74S0	3163.554312	[M-H]-	155	117	74	0	C155H117O74S0	3161.539759
465	Proanthocyanidin Polymers	Proanthocyanidin Octamer	Proanthocyanidin Octamer 3Ecg2Egc3Egcg	M	162	122	77	0	C162H122O77S0	3298.56308	[M+H]+	162	123	77	0	C162H123O77S0	3299.570356	[M-H]-	162	121	77	0	C162H121O77S0	3297.555803
466	Proanthocyanidin Polymers	Proanthocyanidin Octamer	Proanthocyanidin Octamer 3Ecg3Egc2Egcg	M	155	118	73	0	C155H118O73S0	3146.552121	[M+H]+	155	119	73	0	C155H119O73S0	3147.559397	[M-H]-	155	117	73	0	C155H117O73S0	3145.544845
467	Proanthocyanidin Polymers	Proanthocyanidin Octamer	Proanthocyanidin Octamer 2Cat3Egc3Egcg	M	141	110	66	0	C141H110O66S0	2858.525118	[M+H]+	141	111	66	0	C141H111O66S0	2859.532395	[M-H]-	141	109	66	0	C141H109O66S0	2857.517842
468	Proanthocyanidin Polymers	Proanthocyanidin Octamer	Proanthocyanidin Octamer 3Cat2Egc3Egcg	M	141	110	65	0	C141H110O65S0	2842.530204	[M+H]+	141	111	65	0	C141H111O65S0	2843.53748	[M-H]-	141	109	65	0	C141H109O65S0	2841.522927
469	Proanthocyanidin Polymers	Proanthocyanidin Octamer	Proanthocyanidin Octamer 3Cat3Egc2Egcg	M	134	106	61	0	C134H106O61S0	2690.519245	[M+H]+	134	107	61	0	C134H107O61S0	2691.526522	[M-H]-	134	105	61	0	C134H105O61S0	2689.511969
470	Proanthocyanidin Polymers	Proanthocyanidin Octamer	Proanthocyanidin Octamer 2Cat3Ecg3Egcg	M	162	122	75	0	C162H122O75S0	3266.57325	[M+H]+	162	123	75	0	C162H123O75S0	3267.580527	[M-H]-	162	121	75	0	C162H121O75S0	3265.565974
471	Proanthocyanidin Polymers	Proanthocyanidin Octamer	Proanthocyanidin Octamer 3Cat2Ecg3Egcg	M	155	118	71	0	C155H118O71S0	3114.562292	[M+H]+	155	119	71	0	C155H119O71S0	3115.569568	[M-H]-	155	117	71	0	C155H117O71S0	3113.555015
472	Proanthocyanidin Polymers	Proanthocyanidin Octamer	Proanthocyanidin Octamer 3Cat3Ecg2Egcg	M	155	118	70	0	C155H118O70S0	3098.567377	[M+H]+	155	119	70	0	C155H119O70S0	3099.574654	[M-H]-	155	117	70	0	C155H117O70S0	3097.560101
473	Proanthocyanidin Polymers	Proanthocyanidin Octamer	Proanthocyanidin Octamer 2Cat3Ecg3Egc	M	141	110	63	0	C141H110O63S0	2810.540375	[M+H]+	141	111	63	0	C141H111O63S0	2811.547651	[M-H]-	141	109	63	0	C141H109O63S0	2809.533098
474	Proanthocyanidin Polymers	Proanthocyanidin Octamer	Proanthocyanidin Octamer 3Cat2Ecg3Egc	M	134	106	59	0	C134H106O59S0	2658.529416	[M+H]+	134	107	59	0	C134H107O59S0	2659.536692	[M-H]-	134	105	59	0	C134H105O59S0	2657.52214
475	Proanthocyanidin Polymers	Proanthocyanidin Octamer	Proanthocyanidin Octamer 3Cat3Ecg2Egc	M	141	110	62	0	C141H110O62S0	2794.54546	[M+H]+	141	111	62	0	C141H111O62S0	2795.552736	[M-H]-	141	109	62	0	C141H109O62S0	2793.538184
476	Proanthocyanidin Polymers	Proanthocyanidin Octamer	Proanthocyanidin Octamer 3Cat3Ecg1Egc1Egcg	M	148	114	66	0	C148H114O66S0	2946.556419	[M+H]+	148	115	66	0	C148H115O66S0	2947.563695	[M-H]-	148	113	66	0	C148H113O66S0	2945.549142
477	Proanthocyanidin Polymers	Proanthocyanidin Octamer	Proanthocyanidin Octamer 3Cat1Ecg3Egc1Egcg	M	134	106	60	0	C134H106O60S0	2674.524331	[M+H]+	134	107	60	0	C134H107O60S0	2675.531607	[M-H]-	134	105	60	0	C134H105O60S0	2673.517054
478	Proanthocyanidin Polymers	Proanthocyanidin Octamer	Proanthocyanidin Octamer 3Cat1Ecg1Egc3Egcg	M	148	114	68	0	C148H114O68S0	2978.546248	[M+H]+	148	115	68	0	C148H115O68S0	2979.553524	[M-H]-	148	113	68	0	C148H113O68S0	2977.538971
479	Proanthocyanidin Polymers	Proanthocyanidin Octamer	Proanthocyanidin Octamer 1Cat3Ecg3Egc1Egcg	M	148	114	68	0	C148H114O68S0	2978.546248	[M+H]+	148	115	68	0	C148H115O68S0	2979.553524	[M-H]-	148	113	68	0	C148H113O68S0	2977.538971
480	Proanthocyanidin Polymers	Proanthocyanidin Octamer	Proanthocyanidin Octamer 1Cat3Ecg1Egc3Egcg	M	162	122	76	0	C162H122O76S0	3282.568165	[M+H]+	162	123	76	0	C162H123O76S0	3283.575441	[M-H]-	162	121	76	0	C162H121O76S0	3281.560889
481	Proanthocyanidin Polymers	Proanthocyanidin Octamer	Proanthocyanidin Octamer 1Cat1Ecg3Egc3Egcg	M	148	114	70	0	C148H114O70S0	3010.536077	[M+H]+	148	115	70	0	C148H115O70S0	3011.543353	[M-H]-	148	113	70	0	C148H113O70S0	3009.528801
482	Proanthocyanidin Polymers	Proanthocyanidin Octamer	Proanthocyanidin Octamer 3Cat1Ecg2Egc2Egcg	M	141	110	64	0	C141H110O64S0	2826.535289	[M+H]+	141	111	64	0	C141H111O64S0	2827.542566	[M-H]-	141	109	64	0	C141H109O64S0	2825.528013
483	Proanthocyanidin Polymers	Proanthocyanidin Octamer	Proanthocyanidin Octamer 3Cat2Ecg1Egc2Egcg	M	148	114	67	0	C148H114O67S0	2962.551333	[M+H]+	148	115	67	0	C148H115O67S0	2963.55861	[M-H]-	148	113	67	0	C148H113O67S0	2961.544057
484	Proanthocyanidin Polymers	Proanthocyanidin Octamer	Proanthocyanidin Octamer 3Cat2Ecg2Egc1Egcg	M	141	110	63	0	C141H110O63S0	2810.540375	[M+H]+	141	111	63	0	C141H111O63S0	2811.547651	[M-H]-	141	109	63	0	C141H109O63S0	2809.533098
485	Proanthocyanidin Polymers	Proanthocyanidin Octamer	Proanthocyanidin Octamer 1Cat3Ecg2Egc2Egcg	M	155	118	72	0	C155H118O72S0	3130.557206	[M+H]+	155	119	72	0	C155H119O72S0	3131.564483	[M-H]-	155	117	72	0	C155H117O72S0	3129.54993
486	Proanthocyanidin Polymers	Proanthocyanidin Octamer	Proanthocyanidin Octamer 2Cat3Ecg1Egc2Egcg	M	155	118	71	0	C155H118O71S0	3114.562292	[M+H]+	155	119	71	0	C155H119O71S0	3115.569568	[M-H]-	155	117	71	0	C155H117O71S0	3113.555015
487	Proanthocyanidin Polymers	Proanthocyanidin Octamer	Proanthocyanidin Octamer 2Cat3Ecg2Egc1Egcg	M	148	114	67	0	C148H114O67S0	2962.551333	[M+H]+	148	115	67	0	C148H115O67S0	2963.55861	[M-H]-	148	113	67	0	C148H113O67S0	2961.544057
488	Proanthocyanidin Polymers	Proanthocyanidin Octamer	Proanthocyanidin Octamer 1Cat2Ecg3Egc2Egcg	M	148	114	69	0	C148H114O69S0	2994.541162	[M+H]+	148	115	69	0	C148H115O69S0	2995.548439	[M-H]-	148	113	69	0	C148H113O69S0	2993.533886
489	Proanthocyanidin Polymers	Proanthocyanidin Octamer	Proanthocyanidin Octamer 2Cat1Ecg3Egc2Egcg	M	141	110	65	0	C141H110O65S0	2842.530204	[M+H]+	141	111	65	0	C141H111O65S0	2843.53748	[M-H]-	141	109	65	0	C141H109O65S0	2841.522927
490	Proanthocyanidin Polymers	Proanthocyanidin Octamer	Proanthocyanidin Octamer 2Cat2Ecg3Egc1Egcg	M	141	110	64	0	C141H110O64S0	2826.535289	[M+H]+	141	111	64	0	C141H111O64S0	2827.542566	[M-H]-	141	109	64	0	C141H109O64S0	2825.528013
491	Proanthocyanidin Polymers	Proanthocyanidin Octamer	Proanthocyanidin Octamer 1Cat2Ecg2Egc3Egcg	M	155	118	73	0	C155H118O73S0	3146.552121	[M+H]+	155	119	73	0	C155H119O73S0	3147.559397	[M-H]-	155	117	73	0	C155H117O73S0	3145.544845
492	Proanthocyanidin Polymers	Proanthocyanidin Octamer	Proanthocyanidin Octamer 2Cat1Ecg2Egc3Egcg	M	148	114	69	0	C148H114O69S0	2994.541162	[M+H]+	148	115	69	0	C148H115O69S0	2995.548439	[M-H]-	148	113	69	0	C148H113O69S0	2993.533886
493	Proanthocyanidin Polymers	Proanthocyanidin Octamer	Proanthocyanidin Octamer 2Cat2Ecg1Egc3Egcg	M	155	118	72	0	C155H118O72S0	3130.557206	[M+H]+	155	119	72	0	C155H119O72S0	3131.564483	[M-H]-	155	117	72	0	C155H117O72S0	3129.54993
494	Proanthocyanidin Polymers	Proanthocyanidin Octamer	Proanthocyanidin Octamer 2Cat2Ecg2Egc2Egcg	M	148	114	68	0	C148H114O68S0	2978.546248	[M+H]+	148	115	68	0	C148H115O68S0	2979.553524	[M-H]-	148	113	68	0	C148H113O68S0	2977.538971
495	Proanthocyanidin Polymers	Proanthocyanidin Nonamer	Proanthocyanidin Nonamer 9Cat	M	135	110	54	0	C135H110O54S0	2594.586143	[M+H]+	135	111	54	0	C135H111O54S0	2595.593419	[M-H]-	135	109	54	0	C135H109O54S0	2593.578867
496	Proanthocyanidin Polymers	Proanthocyanidin Nonamer	Proanthocyanidin Nonamer 9Ecg	M	198	146	90	0	C198H146O90S0	3962.68477	[M+H]+	198	147	90	0	C198H147O90S0	3963.692047	[M-H]-	198	145	90	0	C198H145O90S0	3961.677494
497	Proanthocyanidin Polymers	Proanthocyanidin Nonamer	Proanthocyanidin Nonamer 9Egc	M	135	110	63	0	C135H110O63S0	2738.540375	[M+H]+	135	111	63	0	C135H111O63S0	2739.547651	[M-H]-	135	109	63	0	C135H109O63S0	2737.533098
498	Proanthocyanidin Polymers	Proanthocyanidin Nonamer	Proanthocyanidin Nonamer 9Egcg	M	198	146	99	0	C198H146O99S0	4106.639002	[M+H]+	198	147	99	0	C198H147O99S0	4107.646278	[M-H]-	198	145	99	0	C198H145O99S0	4105.631726
499	Proanthocyanidin Polymers	Proanthocyanidin Nonamer	Proanthocyanidin Nonamer 8Cat1Ecg	M	142	114	58	0	C142H114O58S0	2746.597102	[M+H]+	142	115	58	0	C142H115O58S0	2747.604378	[M-H]-	142	113	58	0	C142H113O58S0	2745.589825
500	Proanthocyanidin Polymers	Proanthocyanidin Nonamer	Proanthocyanidin Nonamer 8Cat1Egc	M	135	110	55	0	C135H110O55S0	2610.581058	[M+H]+	135	111	55	0	C135H111O55S0	2611.588334	[M-H]-	135	109	55	0	C135H109O55S0	2609.573781
501	Proanthocyanidin Polymers	Proanthocyanidin Nonamer	Proanthocyanidin Nonamer 8Cat1Egcg	M	142	114	59	0	C142H114O59S0	2762.592016	[M+H]+	142	115	59	0	C142H115O59S0	2763.599293	[M-H]-	142	113	59	0	C142H113O59S0	2761.58474
502	Proanthocyanidin Polymers	Proanthocyanidin Nonamer	Proanthocyanidin Nonamer 1Cat8Ecg	M	191	142	86	0	C191H142O86S0	3810.673812	[M+H]+	191	143	86	0	C191H143O86S0	3811.681088	[M-H]-	191	141	86	0	C191H141O86S0	3809.666535
503	Proanthocyanidin Polymers	Proanthocyanidin Nonamer	Proanthocyanidin Nonamer 8Ecg1Egc	M	191	142	87	0	C191H142O87S0	3826.668726	[M+H]+	191	143	87	0	C191H143O87S0	3827.676003	[M-H]-	191	141	87	0	C191H141O87S0	3825.66145
504	Proanthocyanidin Polymers	Proanthocyanidin Nonamer	Proanthocyanidin Nonamer 8Ecg1Egcg	M	198	146	91	0	C198H146O91S0	3978.679685	[M+H]+	198	147	91	0	C198H147O91S0	3979.686962	[M-H]-	198	145	91	0	C198H145O91S0	3977.672409
505	Proanthocyanidin Polymers	Proanthocyanidin Nonamer	Proanthocyanidin Nonamer 1Cat8Egc	M	135	110	62	0	C135H110O62S0	2722.54546	[M+H]+	135	111	62	0	C135H111O62S0	2723.552736	[M-H]-	135	109	62	0	C135H109O62S0	2721.538184
506	Proanthocyanidin Polymers	Proanthocyanidin Nonamer	Proanthocyanidin Nonamer 1Ecg8Egc	M	142	114	66	0	C142H114O66S0	2874.556419	[M+H]+	142	115	66	0	C142H115O66S0	2875.563695	[M-H]-	142	113	66	0	C142H113O66S0	2873.549142
507	Proanthocyanidin Polymers	Proanthocyanidin Nonamer	Proanthocyanidin Nonamer 8Egc1Egcg	M	142	114	67	0	C142H114O67S0	2890.551333	[M+H]+	142	115	67	0	C142H115O67S0	2891.55861	[M-H]-	142	113	67	0	C142H113O67S0	2889.544057
508	Proanthocyanidin Polymers	Proanthocyanidin Nonamer	Proanthocyanidin Nonamer 1Cat8Egcg	M	191	142	94	0	C191H142O94S0	3938.633129	[M+H]+	191	143	94	0	C191H143O94S0	3939.640405	[M-H]-	191	141	94	0	C191H141O94S0	3937.625852
509	Proanthocyanidin Polymers	Proanthocyanidin Nonamer	Proanthocyanidin Nonamer 1Ecg8Egcg	M	198	146	98	0	C198H146O98S0	4090.644087	[M+H]+	198	147	98	0	C198H147O98S0	4091.651364	[M-H]-	198	145	98	0	C198H145O98S0	4089.636811
510	Proanthocyanidin Polymers	Proanthocyanidin Nonamer	Proanthocyanidin Nonamer 1Egc8Egcg	M	191	142	95	0	C191H142O95S0	3954.628043	[M+H]+	191	143	95	0	C191H143O95S0	3955.63532	[M-H]-	191	141	95	0	C191H141O95S0	3953.620767
511	Proanthocyanidin Polymers	Proanthocyanidin Nonamer	Proanthocyanidin Nonamer 7Cat2Ecg	M	149	118	62	0	C149H118O62S0	2898.60806	[M+H]+	149	119	62	0	C149H119O62S0	2899.615337	[M-H]-	149	117	62	0	C149H117O62S0	2897.600784
512	Proanthocyanidin Polymers	Proanthocyanidin Nonamer	Proanthocyanidin Nonamer 7Cat2Egc	M	135	110	56	0	C135H110O56S0	2626.575972	[M+H]+	135	111	56	0	C135H111O56S0	2627.583249	[M-H]-	135	109	56	0	C135H109O56S0	2625.568696
513	Proanthocyanidin Polymers	Proanthocyanidin Nonamer	Proanthocyanidin Nonamer 7Cat2Egcg	M	149	118	64	0	C149H118O64S0	2930.597889	[M+H]+	149	119	64	0	C149H119O64S0	2931.605166	[M-H]-	149	117	64	0	C149H117O64S0	2929.590613
514	Proanthocyanidin Polymers	Proanthocyanidin Nonamer	Proanthocyanidin Nonamer 2Cat7Ecg	M	184	138	82	0	C184H138O82S0	3658.662853	[M+H]+	184	139	82	0	C184H139O82S0	3659.67013	[M-H]-	184	137	82	0	C184H137O82S0	3657.655577
515	Proanthocyanidin Polymers	Proanthocyanidin Nonamer	Proanthocyanidin Nonamer 7Ecg2Egc	M	184	138	84	0	C184H138O84S0	3690.652682	[M+H]+	184	139	84	0	C184H139O84S0	3691.659959	[M-H]-	184	137	84	0	C184H137O84S0	3689.645406
516	Proanthocyanidin Polymers	Proanthocyanidin Nonamer	Proanthocyanidin Nonamer 7Ecg2Egcg	M	198	146	92	0	C198H146O92S0	3994.6746	[M+H]+	198	147	92	0	C198H147O92S0	3995.681876	[M-H]-	198	145	92	0	C198H145O92S0	3993.667323
517	Proanthocyanidin Polymers	Proanthocyanidin Nonamer	Proanthocyanidin Nonamer 2Cat7Egc	M	135	110	61	0	C135H110O61S0	2706.550545	[M+H]+	135	111	61	0	C135H111O61S0	2707.557822	[M-H]-	135	109	61	0	C135H109O61S0	2705.543269
518	Proanthocyanidin Polymers	Proanthocyanidin Nonamer	Proanthocyanidin Nonamer 2Ecg7Egc	M	149	118	69	0	C149H118O69S0	3010.572463	[M+H]+	149	119	69	0	C149H119O69S0	3011.579739	[M-H]-	149	117	69	0	C149H117O69S0	3009.565186
519	Proanthocyanidin Polymers	Proanthocyanidin Nonamer	Proanthocyanidin Nonamer 7Egc2Egcg	M	149	118	71	0	C149H118O71S0	3042.562292	[M+H]+	149	119	71	0	C149H119O71S0	3043.569568	[M-H]-	149	117	71	0	C149H117O71S0	3041.555015
520	Proanthocyanidin Polymers	Proanthocyanidin Nonamer	Proanthocyanidin Nonamer 2Cat7Egcg	M	184	138	89	0	C184H138O89S0	3770.627256	[M+H]+	184	139	89	0	C184H139O89S0	3771.634532	[M-H]-	184	137	89	0	C184H137O89S0	3769.619979
521	Proanthocyanidin Polymers	Proanthocyanidin Nonamer	Proanthocyanidin Nonamer 2Ecg7Egcg	M	198	146	97	0	C198H146O97S0	4074.649173	[M+H]+	198	147	97	0	C198H147O97S0	4075.656449	[M-H]-	198	145	97	0	C198H145O97S0	4073.641896
522	Proanthocyanidin Polymers	Proanthocyanidin Nonamer	Proanthocyanidin Nonamer 2Egc7Egcg	M	184	138	91	0	C184H138O91S0	3802.617085	[M+H]+	184	139	91	0	C184H139O91S0	3803.624361	[M-H]-	184	137	91	0	C184H137O91S0	3801.609808
523	Proanthocyanidin Polymers	Proanthocyanidin Nonamer	Proanthocyanidin Nonamer 7Cat1Ecg1Egc	M	142	114	59	0	C142H114O59S0	2762.592016	[M+H]+	142	115	59	0	C142H115O59S0	2763.599293	[M-H]-	142	113	59	0	C142H113O59S0	2761.58474
524	Proanthocyanidin Polymers	Proanthocyanidin Nonamer	Proanthocyanidin Nonamer 7Cat1Ecg1Egcg	M	149	118	63	0	C149H118O63S0	2914.602975	[M+H]+	149	119	63	0	C149H119O63S0	2915.610251	[M-H]-	149	117	63	0	C149H117O63S0	2913.595698
525	Proanthocyanidin Polymers	Proanthocyanidin Nonamer	Proanthocyanidin Nonamer 7Cat1Egc1Egcg	M	142	114	60	0	C142H114O60S0	2778.586931	[M+H]+	142	115	60	0	C142H115O60S0	2779.594207	[M-H]-	142	113	60	0	C142H113O60S0	2777.579654
526	Proanthocyanidin Polymers	Proanthocyanidin Nonamer	Proanthocyanidin Nonamer 1Cat7Ecg1Egc	M	184	138	83	0	C184H138O83S0	3674.657768	[M+H]+	184	139	83	0	C184H139O83S0	3675.665044	[M-H]-	184	137	83	0	C184H137O83S0	3673.650491
527	Proanthocyanidin Polymers	Proanthocyanidin Nonamer	Proanthocyanidin Nonamer 1Cat7Ecg1Egcg	M	191	142	87	0	C191H142O87S0	3826.668726	[M+H]+	191	143	87	0	C191H143O87S0	3827.676003	[M-H]-	191	141	87	0	C191H141O87S0	3825.66145
528	Proanthocyanidin Polymers	Proanthocyanidin Nonamer	Proanthocyanidin Nonamer 7Ecg1Egc1Egcg	M	191	142	88	0	C191H142O88S0	3842.663641	[M+H]+	191	143	88	0	C191H143O88S0	3843.670918	[M-H]-	191	141	88	0	C191H141O88S0	3841.656365
529	Proanthocyanidin Polymers	Proanthocyanidin Nonamer	Proanthocyanidin Nonamer 1Cat1Ecg7Egc	M	142	114	65	0	C142H114O65S0	2858.561504	[M+H]+	142	115	65	0	C142H115O65S0	2859.56878	[M-H]-	142	113	65	0	C142H113O65S0	2857.554227
530	Proanthocyanidin Polymers	Proanthocyanidin Nonamer	Proanthocyanidin Nonamer 1Cat7Egc1Egcg	M	142	114	66	0	C142H114O66S0	2874.556419	[M+H]+	142	115	66	0	C142H115O66S0	2875.563695	[M-H]-	142	113	66	0	C142H113O66S0	2873.549142
531	Proanthocyanidin Polymers	Proanthocyanidin Nonamer	Proanthocyanidin Nonamer 1Ecg7Egc1Egcg	M	149	118	70	0	C149H118O70S0	3026.567377	[M+H]+	149	119	70	0	C149H119O70S0	3027.574654	[M-H]-	149	117	70	0	C149H117O70S0	3025.560101
532	Proanthocyanidin Polymers	Proanthocyanidin Nonamer	Proanthocyanidin Nonamer 1Cat1Ecg7Egcg	M	191	142	93	0	C191H142O93S0	3922.638214	[M+H]+	191	143	93	0	C191H143O93S0	3923.645491	[M-H]-	191	141	93	0	C191H141O93S0	3921.630938
533	Proanthocyanidin Polymers	Proanthocyanidin Nonamer	Proanthocyanidin Nonamer 1Cat1Egc7Egcg	M	184	138	90	0	C184H138O90S0	3786.62217	[M+H]+	184	139	90	0	C184H139O90S0	3787.629447	[M-H]-	184	137	90	0	C184H137O90S0	3785.614894
534	Proanthocyanidin Polymers	Proanthocyanidin Nonamer	Proanthocyanidin Nonamer 1Ecg1Egc7Egcg	M	191	142	94	0	C191H142O94S0	3938.633129	[M+H]+	191	143	94	0	C191H143O94S0	3939.640405	[M-H]-	191	141	94	0	C191H141O94S0	3937.625852
535	Proanthocyanidin Polymers	Proanthocyanidin Nonamer	Proanthocyanidin Nonamer 6Cat3Ecg	M	156	122	66	0	C156H122O66S0	3050.619019	[M+H]+	156	123	66	0	C156H123O66S0	3051.626295	[M-H]-	156	121	66	0	C156H121O66S0	3049.611742
536	Proanthocyanidin Polymers	Proanthocyanidin Nonamer	Proanthocyanidin Nonamer 6Cat3Egc	M	135	110	57	0	C135H110O57S0	2642.570887	[M+H]+	135	111	57	0	C135H111O57S0	2643.578163	[M-H]-	135	109	57	0	C135H109O57S0	2641.56361
537	Proanthocyanidin Polymers	Proanthocyanidin Nonamer	Proanthocyanidin Nonamer 6Cat3Egcg	M	156	122	69	0	C156H122O69S0	3098.603763	[M+H]+	156	123	69	0	C156H123O69S0	3099.611039	[M-H]-	156	121	69	0	C156H121O69S0	3097.596486
538	Proanthocyanidin Polymers	Proanthocyanidin Nonamer	Proanthocyanidin Nonamer 3Cat6Ecg	M	177	134	78	0	C177H134O78S0	3506.651895	[M+H]+	177	135	78	0	C177H135O78S0	3507.659171	[M-H]-	177	133	78	0	C177H133O78S0	3505.644618
539	Proanthocyanidin Polymers	Proanthocyanidin Nonamer	Proanthocyanidin Nonamer 6Ecg3Egc	M	177	134	81	0	C177H134O81S0	3554.636639	[M+H]+	177	135	81	0	C177H135O81S0	3555.643915	[M-H]-	177	133	81	0	C177H133O81S0	3553.629362
540	Proanthocyanidin Polymers	Proanthocyanidin Nonamer	Proanthocyanidin Nonamer 6Ecg3Egcg	M	198	146	93	0	C198H146O93S0	4010.669514	[M+H]+	198	147	93	0	C198H147O93S0	4011.676791	[M-H]-	198	145	93	0	C198H145O93S0	4009.662238
541	Proanthocyanidin Polymers	Proanthocyanidin Nonamer	Proanthocyanidin Nonamer 3Cat6Egc	M	135	110	60	0	C135H110O60S0	2690.555631	[M+H]+	135	111	60	0	C135H111O60S0	2691.562907	[M-H]-	135	109	60	0	C135H109O60S0	2689.548354
542	Proanthocyanidin Polymers	Proanthocyanidin Nonamer	Proanthocyanidin Nonamer 3Ecg6Egc	M	156	122	72	0	C156H122O72S0	3146.588507	[M+H]+	156	123	72	0	C156H123O72S0	3147.595783	[M-H]-	156	121	72	0	C156H121O72S0	3145.58123
543	Proanthocyanidin Polymers	Proanthocyanidin Nonamer	Proanthocyanidin Nonamer 6Egc3Egcg	M	156	122	75	0	C156H122O75S0	3194.57325	[M+H]+	156	123	75	0	C156H123O75S0	3195.580527	[M-H]-	156	121	75	0	C156H121O75S0	3193.565974
544	Proanthocyanidin Polymers	Proanthocyanidin Nonamer	Proanthocyanidin Nonamer 3Cat6Egcg	M	177	134	84	0	C177H134O84S0	3602.621382	[M+H]+	177	135	84	0	C177H135O84S0	3603.628659	[M-H]-	177	133	84	0	C177H133O84S0	3601.614106
545	Proanthocyanidin Polymers	Proanthocyanidin Nonamer	Proanthocyanidin Nonamer 3Ecg6Egcg	M	198	146	96	0	C198H146O96S0	4058.654258	[M+H]+	198	147	96	0	C198H147O96S0	4059.661535	[M-H]-	198	145	96	0	C198H145O96S0	4057.646982
546	Proanthocyanidin Polymers	Proanthocyanidin Nonamer	Proanthocyanidin Nonamer 3Egc6Egcg	M	177	134	87	0	C177H134O87S0	3650.606126	[M+H]+	177	135	87	0	C177H135O87S0	3651.613403	[M-H]-	177	133	87	0	C177H133O87S0	3649.59885
547	Proanthocyanidin Polymers	Proanthocyanidin Nonamer	Proanthocyanidin Nonamer 6Cat2Ecg1Egc	M	149	118	63	0	C149H118O63S0	2914.602975	[M+H]+	149	119	63	0	C149H119O63S0	2915.610251	[M-H]-	149	117	63	0	C149H117O63S0	2913.595698
548	Proanthocyanidin Polymers	Proanthocyanidin Nonamer	Proanthocyanidin Nonamer 6Cat2Ecg1Egcg	M	156	122	67	0	C156H122O67S0	3066.613933	[M+H]+	156	123	67	0	C156H123O67S0	3067.62121	[M-H]-	156	121	67	0	C156H121O67S0	3065.606657
549	Proanthocyanidin Polymers	Proanthocyanidin Nonamer	Proanthocyanidin Nonamer 6Cat1Ecg2Egc	M	142	114	60	0	C142H114O60S0	2778.586931	[M+H]+	142	115	60	0	C142H115O60S0	2779.594207	[M-H]-	142	113	60	0	C142H113O60S0	2777.579654
550	Proanthocyanidin Polymers	Proanthocyanidin Nonamer	Proanthocyanidin Nonamer 6Cat1Ecg2Egcg	M	156	122	68	0	C156H122O68S0	3082.608848	[M+H]+	156	123	68	0	C156H123O68S0	3083.616125	[M-H]-	156	121	68	0	C156H121O68S0	3081.601572
551	Proanthocyanidin Polymers	Proanthocyanidin Nonamer	Proanthocyanidin Nonamer 6Cat1Egc2Egcg	M	149	118	65	0	C149H118O65S0	2946.592804	[M+H]+	149	119	65	0	C149H119O65S0	2947.600081	[M-H]-	149	117	65	0	C149H117O65S0	2945.585528
552	Proanthocyanidin Polymers	Proanthocyanidin Nonamer	Proanthocyanidin Nonamer 6Cat2Egc1Egcg	M	142	114	61	0	C142H114O61S0	2794.581845	[M+H]+	142	115	61	0	C142H115O61S0	2795.589122	[M-H]-	142	113	61	0	C142H113O61S0	2793.574569
553	Proanthocyanidin Polymers	Proanthocyanidin Nonamer	Proanthocyanidin Nonamer 2Cat6Ecg1Egc	M	177	134	79	0	C177H134O79S0	3522.646809	[M+H]+	177	135	79	0	C177H135O79S0	3523.654086	[M-H]-	177	133	79	0	C177H133O79S0	3521.639533
554	Proanthocyanidin Polymers	Proanthocyanidin Nonamer	Proanthocyanidin Nonamer 2Cat6Ecg1Egcg	M	184	138	83	0	C184H138O83S0	3674.657768	[M+H]+	184	139	83	0	C184H139O83S0	3675.665044	[M-H]-	184	137	83	0	C184H137O83S0	3673.650491
555	Proanthocyanidin Polymers	Proanthocyanidin Nonamer	Proanthocyanidin Nonamer 1Cat6Ecg2Egc	M	177	134	80	0	C177H134O80S0	3538.641724	[M+H]+	177	135	80	0	C177H135O80S0	3539.649	[M-H]-	177	133	80	0	C177H133O80S0	3537.634447
556	Proanthocyanidin Polymers	Proanthocyanidin Nonamer	Proanthocyanidin Nonamer 1Cat6Ecg2Egcg	M	191	142	88	0	C191H142O88S0	3842.663641	[M+H]+	191	143	88	0	C191H143O88S0	3843.670918	[M-H]-	191	141	88	0	C191H141O88S0	3841.656365
557	Proanthocyanidin Polymers	Proanthocyanidin Nonamer	Proanthocyanidin Nonamer 6Ecg1Egc2Egcg	M	191	142	89	0	C191H142O89S0	3858.658556	[M+H]+	191	143	89	0	C191H143O89S0	3859.665832	[M-H]-	191	141	89	0	C191H141O89S0	3857.651279
558	Proanthocyanidin Polymers	Proanthocyanidin Nonamer	Proanthocyanidin Nonamer 6Ecg2Egc1Egcg	M	184	138	85	0	C184H138O85S0	3706.647597	[M+H]+	184	139	85	0	C184H139O85S0	3707.654874	[M-H]-	184	137	85	0	C184H137O85S0	3705.640321
559	Proanthocyanidin Polymers	Proanthocyanidin Nonamer	Proanthocyanidin Nonamer 2Cat1Ecg6Egc	M	142	114	64	0	C142H114O64S0	2842.566589	[M+H]+	142	115	64	0	C142H115O64S0	2843.573866	[M-H]-	142	113	64	0	C142H113O64S0	2841.559313
560	Proanthocyanidin Polymers	Proanthocyanidin Nonamer	Proanthocyanidin Nonamer 2Cat6Egc1Egcg	M	142	114	65	0	C142H114O65S0	2858.561504	[M+H]+	142	115	65	0	C142H115O65S0	2859.56878	[M-H]-	142	113	65	0	C142H113O65S0	2857.554227
561	Proanthocyanidin Polymers	Proanthocyanidin Nonamer	Proanthocyanidin Nonamer 1Cat2Ecg6Egc	M	149	118	68	0	C149H118O68S0	2994.577548	[M+H]+	149	119	68	0	C149H119O68S0	2995.584824	[M-H]-	149	117	68	0	C149H117O68S0	2993.570271
562	Proanthocyanidin Polymers	Proanthocyanidin Nonamer	Proanthocyanidin Nonamer 1Cat6Egc2Egcg	M	149	118	70	0	C149H118O70S0	3026.567377	[M+H]+	149	119	70	0	C149H119O70S0	3027.574654	[M-H]-	149	117	70	0	C149H117O70S0	3025.560101
563	Proanthocyanidin Polymers	Proanthocyanidin Nonamer	Proanthocyanidin Nonamer 1Ecg6Egc2Egcg	M	156	122	74	0	C156H122O74S0	3178.578336	[M+H]+	156	123	74	0	C156H123O74S0	3179.585612	[M-H]-	156	121	74	0	C156H121O74S0	3177.571059
564	Proanthocyanidin Polymers	Proanthocyanidin Nonamer	Proanthocyanidin Nonamer 2Ecg6Egc1Egcg	M	156	122	73	0	C156H122O73S0	3162.583421	[M+H]+	156	123	73	0	C156H123O73S0	3163.590698	[M-H]-	156	121	73	0	C156H121O73S0	3161.576145
565	Proanthocyanidin Polymers	Proanthocyanidin Nonamer	Proanthocyanidin Nonamer 2Cat1Ecg6Egcg	M	184	138	88	0	C184H138O88S0	3754.632341	[M+H]+	184	139	88	0	C184H139O88S0	3755.639617	[M-H]-	184	137	88	0	C184H137O88S0	3753.625065
566	Proanthocyanidin Polymers	Proanthocyanidin Nonamer	Proanthocyanidin Nonamer 2Cat1Egc6Egcg	M	177	134	85	0	C177H134O85S0	3618.616297	[M+H]+	177	135	85	0	C177H135O85S0	3619.623573	[M-H]-	177	133	85	0	C177H133O85S0	3617.609021
567	Proanthocyanidin Polymers	Proanthocyanidin Nonamer	Proanthocyanidin Nonamer 1Cat2Ecg6Egcg	M	191	142	92	0	C191H142O92S0	3906.6433	[M+H]+	191	143	92	0	C191H143O92S0	3907.650576	[M-H]-	191	141	92	0	C191H141O92S0	3905.636023
568	Proanthocyanidin Polymers	Proanthocyanidin Nonamer	Proanthocyanidin Nonamer 1Cat2Egc6Egcg	M	177	134	86	0	C177H134O86S0	3634.611212	[M+H]+	177	135	86	0	C177H135O86S0	3635.618488	[M-H]-	177	133	86	0	C177H133O86S0	3633.603935
569	Proanthocyanidin Polymers	Proanthocyanidin Nonamer	Proanthocyanidin Nonamer 1Ecg2Egc6Egcg	M	184	138	90	0	C184H138O90S0	3786.62217	[M+H]+	184	139	90	0	C184H139O90S0	3787.629447	[M-H]-	184	137	90	0	C184H137O90S0	3785.614894
570	Proanthocyanidin Polymers	Proanthocyanidin Nonamer	Proanthocyanidin Nonamer 2Ecg1Egc6Egcg	M	191	142	93	0	C191H142O93S0	3922.638214	[M+H]+	191	143	93	0	C191H143O93S0	3923.645491	[M-H]-	191	141	93	0	C191H141O93S0	3921.630938
571	Proanthocyanidin Polymers	Proanthocyanidin Nonamer	Proanthocyanidin Nonamer 6Cat1Ecg1Egc1Egcg	M	149	118	64	0	C149H118O64S0	2930.597889	[M+H]+	149	119	64	0	C149H119O64S0	2931.605166	[M-H]-	149	117	64	0	C149H117O64S0	2929.590613
572	Proanthocyanidin Polymers	Proanthocyanidin Nonamer	Proanthocyanidin Nonamer 1Cat6Ecg1Egc1Egcg	M	184	138	84	0	C184H138O84S0	3690.652682	[M+H]+	184	139	84	0	C184H139O84S0	3691.659959	[M-H]-	184	137	84	0	C184H137O84S0	3689.645406
573	Proanthocyanidin Polymers	Proanthocyanidin Nonamer	Proanthocyanidin Nonamer 1Cat1Ecg6Egc1Egcg	M	149	118	69	0	C149H118O69S0	3010.572463	[M+H]+	149	119	69	0	C149H119O69S0	3011.579739	[M-H]-	149	117	69	0	C149H117O69S0	3009.565186
574	Proanthocyanidin Polymers	Proanthocyanidin Nonamer	Proanthocyanidin Nonamer 1Cat1Ecg1Egc6Egcg	M	184	138	89	0	C184H138O89S0	3770.627256	[M+H]+	184	139	89	0	C184H139O89S0	3771.634532	[M-H]-	184	137	89	0	C184H137O89S0	3769.619979
575	Proanthocyanidin Polymers	Proanthocyanidin Nonamer	Proanthocyanidin Nonamer 5Cat4Ecg	M	163	126	70	0	C163H126O70S0	3202.629977	[M+H]+	163	127	70	0	C163H127O70S0	3203.637254	[M-H]-	163	125	70	0	C163H125O70S0	3201.622701
576	Proanthocyanidin Polymers	Proanthocyanidin Nonamer	Proanthocyanidin Nonamer 5Cat4Egc	M	135	110	58	0	C135H110O58S0	2658.565801	[M+H]+	135	111	58	0	C135H111O58S0	2659.573078	[M-H]-	135	109	58	0	C135H109O58S0	2657.558525
577	Proanthocyanidin Polymers	Proanthocyanidin Nonamer	Proanthocyanidin Nonamer 5Cat4Egcg	M	163	126	74	0	C163H126O74S0	3266.609636	[M+H]+	163	127	74	0	C163H127O74S0	3267.616912	[M-H]-	163	125	74	0	C163H125O74S0	3265.602359
578	Proanthocyanidin Polymers	Proanthocyanidin Nonamer	Proanthocyanidin Nonamer 4Cat5Ecg	M	170	130	74	0	C170H130O74S0	3354.640936	[M+H]+	170	131	74	0	C170H131O74S0	3355.648212	[M-H]-	170	129	74	0	C170H129O74S0	3353.63366
579	Proanthocyanidin Polymers	Proanthocyanidin Nonamer	Proanthocyanidin Nonamer 5Ecg4Egc	M	170	130	78	0	C170H130O78S0	3418.620595	[M+H]+	170	131	78	0	C170H131O78S0	3419.627871	[M-H]-	170	129	78	0	C170H129O78S0	3417.613318
580	Proanthocyanidin Polymers	Proanthocyanidin Nonamer	Proanthocyanidin Nonamer 5Ecg4Egcg	M	198	146	94	0	C198H146O94S0	4026.664429	[M+H]+	198	147	94	0	C198H147O94S0	4027.671705	[M-H]-	198	145	94	0	C198H145O94S0	4025.657152
581	Proanthocyanidin Polymers	Proanthocyanidin Nonamer	Proanthocyanidin Nonamer 4Cat5Egc	M	135	110	59	0	C135H110O59S0	2674.560716	[M+H]+	135	111	59	0	C135H111O59S0	2675.567993	[M-H]-	135	109	59	0	C135H109O59S0	2673.55344
582	Proanthocyanidin Polymers	Proanthocyanidin Nonamer	Proanthocyanidin Nonamer 4Ecg5Egc	M	163	126	75	0	C163H126O75S0	3282.604551	[M+H]+	163	127	75	0	C163H127O75S0	3283.611827	[M-H]-	163	125	75	0	C163H125O75S0	3281.597274
583	Proanthocyanidin Polymers	Proanthocyanidin Nonamer	Proanthocyanidin Nonamer 5Egc4Egcg	M	163	126	79	0	C163H126O79S0	3346.584209	[M+H]+	163	127	79	0	C163H127O79S0	3347.591485	[M-H]-	163	125	79	0	C163H125O79S0	3345.576933
584	Proanthocyanidin Polymers	Proanthocyanidin Nonamer	Proanthocyanidin Nonamer 4Cat5Egcg	M	170	130	79	0	C170H130O79S0	3434.615509	[M+H]+	170	131	79	0	C170H131O79S0	3435.622786	[M-H]-	170	129	79	0	C170H129O79S0	3433.608233
585	Proanthocyanidin Polymers	Proanthocyanidin Nonamer	Proanthocyanidin Nonamer 4Ecg5Egcg	M	198	146	95	0	C198H146O95S0	4042.659344	[M+H]+	198	147	95	0	C198H147O95S0	4043.66662	[M-H]-	198	145	95	0	C198H145O95S0	4041.652067
586	Proanthocyanidin Polymers	Proanthocyanidin Nonamer	Proanthocyanidin Nonamer 4Egc5Egcg	M	170	130	83	0	C170H130O83S0	3498.595168	[M+H]+	170	131	83	0	C170H131O83S0	3499.602444	[M-H]-	170	129	83	0	C170H129O83S0	3497.587891
587	Proanthocyanidin Polymers	Proanthocyanidin Nonamer	Proanthocyanidin Nonamer 5Cat3Ecg1Egc	M	156	122	67	0	C156H122O67S0	3066.613933	[M+H]+	156	123	67	0	C156H123O67S0	3067.62121	[M-H]-	156	121	67	0	C156H121O67S0	3065.606657
588	Proanthocyanidin Polymers	Proanthocyanidin Nonamer	Proanthocyanidin Nonamer 5Cat3Ecg1Egcg	M	163	126	71	0	C163H126O71S0	3218.624892	[M+H]+	163	127	71	0	C163H127O71S0	3219.632169	[M-H]-	163	125	71	0	C163H125O71S0	3217.617616
589	Proanthocyanidin Polymers	Proanthocyanidin Nonamer	Proanthocyanidin Nonamer 5Cat1Ecg3Egc	M	142	114	61	0	C142H114O61S0	2794.581845	[M+H]+	142	115	61	0	C142H115O61S0	2795.589122	[M-H]-	142	113	61	0	C142H113O61S0	2793.574569
590	Proanthocyanidin Polymers	Proanthocyanidin Nonamer	Proanthocyanidin Nonamer 5Cat1Ecg3Egcg	M	163	126	73	0	C163H126O73S0	3250.614721	[M+H]+	163	127	73	0	C163H127O73S0	3251.621998	[M-H]-	163	125	73	0	C163H125O73S0	3249.607445
591	Proanthocyanidin Polymers	Proanthocyanidin Nonamer	Proanthocyanidin Nonamer 5Cat1Egc3Egcg	M	156	122	70	0	C156H122O70S0	3114.598677	[M+H]+	156	123	70	0	C156H123O70S0	3115.605954	[M-H]-	156	121	70	0	C156H121O70S0	3113.591401
592	Proanthocyanidin Polymers	Proanthocyanidin Nonamer	Proanthocyanidin Nonamer 5Cat3Egc1Egcg	M	142	114	62	0	C142H114O62S0	2810.57676	[M+H]+	142	115	62	0	C142H115O62S0	2811.584037	[M-H]-	142	113	62	0	C142H113O62S0	2809.569484
593	Proanthocyanidin Polymers	Proanthocyanidin Nonamer	Proanthocyanidin Nonamer 3Cat5Ecg1Egc	M	170	130	75	0	C170H130O75S0	3370.635851	[M+H]+	170	131	75	0	C170H131O75S0	3371.643127	[M-H]-	170	129	75	0	C170H129O75S0	3369.628574
594	Proanthocyanidin Polymers	Proanthocyanidin Nonamer	Proanthocyanidin Nonamer 3Cat5Ecg1Egcg	M	177	134	79	0	C177H134O79S0	3522.646809	[M+H]+	177	135	79	0	C177H135O79S0	3523.654086	[M-H]-	177	133	79	0	C177H133O79S0	3521.639533
595	Proanthocyanidin Polymers	Proanthocyanidin Nonamer	Proanthocyanidin Nonamer 1Cat5Ecg3Egc	M	170	130	77	0	C170H130O77S0	3402.62568	[M+H]+	170	131	77	0	C170H131O77S0	3403.632956	[M-H]-	170	129	77	0	C170H129O77S0	3401.618403
596	Proanthocyanidin Polymers	Proanthocyanidin Nonamer	Proanthocyanidin Nonamer 1Cat5Ecg3Egcg	M	191	142	89	0	C191H142O89S0	3858.658556	[M+H]+	191	143	89	0	C191H143O89S0	3859.665832	[M-H]-	191	141	89	0	C191H141O89S0	3857.651279
597	Proanthocyanidin Polymers	Proanthocyanidin Nonamer	Proanthocyanidin Nonamer 5Ecg1Egc3Egcg	M	191	142	90	0	C191H142O90S0	3874.65347	[M+H]+	191	143	90	0	C191H143O90S0	3875.660747	[M-H]-	191	141	90	0	C191H141O90S0	3873.646194
598	Proanthocyanidin Polymers	Proanthocyanidin Nonamer	Proanthocyanidin Nonamer 5Ecg3Egc1Egcg	M	177	134	82	0	C177H134O82S0	3570.631553	[M+H]+	177	135	82	0	C177H135O82S0	3571.63883	[M-H]-	177	133	82	0	C177H133O82S0	3569.624277
599	Proanthocyanidin Polymers	Proanthocyanidin Nonamer	Proanthocyanidin Nonamer 3Cat1Ecg5Egc	M	142	114	63	0	C142H114O63S0	2826.571675	[M+H]+	142	115	63	0	C142H115O63S0	2827.578951	[M-H]-	142	113	63	0	C142H113O63S0	2825.564398
600	Proanthocyanidin Polymers	Proanthocyanidin Nonamer	Proanthocyanidin Nonamer 3Cat5Egc1Egcg	M	142	114	64	0	C142H114O64S0	2842.566589	[M+H]+	142	115	64	0	C142H115O64S0	2843.573866	[M-H]-	142	113	64	0	C142H113O64S0	2841.559313
601	Proanthocyanidin Polymers	Proanthocyanidin Nonamer	Proanthocyanidin Nonamer 1Cat3Ecg5Egc	M	156	122	71	0	C156H122O71S0	3130.593592	[M+H]+	156	123	71	0	C156H123O71S0	3131.600868	[M-H]-	156	121	71	0	C156H121O71S0	3129.586315
602	Proanthocyanidin Polymers	Proanthocyanidin Nonamer	Proanthocyanidin Nonamer 1Cat5Egc3Egcg	M	156	122	74	0	C156H122O74S0	3178.578336	[M+H]+	156	123	74	0	C156H123O74S0	3179.585612	[M-H]-	156	121	74	0	C156H121O74S0	3177.571059
603	Proanthocyanidin Polymers	Proanthocyanidin Nonamer	Proanthocyanidin Nonamer 1Ecg5Egc3Egcg	M	163	126	78	0	C163H126O78S0	3330.589294	[M+H]+	163	127	78	0	C163H127O78S0	3331.596571	[M-H]-	163	125	78	0	C163H125O78S0	3329.582018
604	Proanthocyanidin Polymers	Proanthocyanidin Nonamer	Proanthocyanidin Nonamer 3Ecg5Egc1Egcg	M	163	126	76	0	C163H126O76S0	3298.599465	[M+H]+	163	127	76	0	C163H127O76S0	3299.606742	[M-H]-	163	125	76	0	C163H125O76S0	3297.592189
605	Proanthocyanidin Polymers	Proanthocyanidin Nonamer	Proanthocyanidin Nonamer 3Cat1Ecg5Egcg	M	177	134	83	0	C177H134O83S0	3586.626468	[M+H]+	177	135	83	0	C177H135O83S0	3587.633744	[M-H]-	177	133	83	0	C177H133O83S0	3585.619191
606	Proanthocyanidin Polymers	Proanthocyanidin Nonamer	Proanthocyanidin Nonamer 3Cat1Egc5Egcg	M	170	130	80	0	C170H130O80S0	3450.610424	[M+H]+	170	131	80	0	C170H131O80S0	3451.6177	[M-H]-	170	129	80	0	C170H129O80S0	3449.603147
607	Proanthocyanidin Polymers	Proanthocyanidin Nonamer	Proanthocyanidin Nonamer 1Cat3Ecg5Egcg	M	191	142	91	0	C191H142O91S0	3890.648385	[M+H]+	191	143	91	0	C191H143O91S0	3891.655661	[M-H]-	191	141	91	0	C191H141O91S0	3889.641109
608	Proanthocyanidin Polymers	Proanthocyanidin Nonamer	Proanthocyanidin Nonamer 1Cat3Egc5Egcg	M	170	130	82	0	C170H130O82S0	3482.600253	[M+H]+	170	131	82	0	C170H131O82S0	3483.607529	[M-H]-	170	129	82	0	C170H129O82S0	3481.592977
609	Proanthocyanidin Polymers	Proanthocyanidin Nonamer	Proanthocyanidin Nonamer 1Ecg3Egc5Egcg	M	177	134	86	0	C177H134O86S0	3634.611212	[M+H]+	177	135	86	0	C177H135O86S0	3635.618488	[M-H]-	177	133	86	0	C177H133O86S0	3633.603935
610	Proanthocyanidin Polymers	Proanthocyanidin Nonamer	Proanthocyanidin Nonamer 3Ecg1Egc5Egcg	M	191	142	92	0	C191H142O92S0	3906.6433	[M+H]+	191	143	92	0	C191H143O92S0	3907.650576	[M-H]-	191	141	92	0	C191H141O92S0	3905.636023
611	Proanthocyanidin Polymers	Proanthocyanidin Nonamer	Proanthocyanidin Nonamer 5Cat2Ecg2Egc	M	149	118	64	0	C149H118O64S0	2930.597889	[M+H]+	149	119	64	0	C149H119O64S0	2931.605166	[M-H]-	149	117	64	0	C149H117O64S0	2929.590613
612	Proanthocyanidin Polymers	Proanthocyanidin Nonamer	Proanthocyanidin Nonamer 5Cat2Ecg2Egcg	M	163	126	72	0	C163H126O72S0	3234.619807	[M+H]+	163	127	72	0	C163H127O72S0	3235.627083	[M-H]-	163	125	72	0	C163H125O72S0	3233.61253
613	Proanthocyanidin Polymers	Proanthocyanidin Nonamer	Proanthocyanidin Nonamer 5Cat2Egc2Egcg	M	149	118	66	0	C149H118O66S0	2962.587719	[M+H]+	149	119	66	0	C149H119O66S0	2963.594995	[M-H]-	149	117	66	0	C149H117O66S0	2961.580442
614	Proanthocyanidin Polymers	Proanthocyanidin Nonamer	Proanthocyanidin Nonamer 2Cat5Ecg2Egc	M	170	130	76	0	C170H130O76S0	3386.630765	[M+H]+	170	131	76	0	C170H131O76S0	3387.638042	[M-H]-	170	129	76	0	C170H129O76S0	3385.623489
615	Proanthocyanidin Polymers	Proanthocyanidin Nonamer	Proanthocyanidin Nonamer 2Cat5Ecg2Egcg	M	184	138	84	0	C184H138O84S0	3690.652682	[M+H]+	184	139	84	0	C184H139O84S0	3691.659959	[M-H]-	184	137	84	0	C184H137O84S0	3689.645406
616	Proanthocyanidin Polymers	Proanthocyanidin Nonamer	Proanthocyanidin Nonamer 5Ecg2Egc2Egcg	M	184	138	86	0	C184H138O86S0	3722.642512	[M+H]+	184	139	86	0	C184H139O86S0	3723.649788	[M-H]-	184	137	86	0	C184H137O86S0	3721.635235
617	Proanthocyanidin Polymers	Proanthocyanidin Nonamer	Proanthocyanidin Nonamer 2Cat2Ecg5Egc	M	149	118	67	0	C149H118O67S0	2978.582633	[M+H]+	149	119	67	0	C149H119O67S0	2979.58991	[M-H]-	149	117	67	0	C149H117O67S0	2977.575357
618	Proanthocyanidin Polymers	Proanthocyanidin Nonamer	Proanthocyanidin Nonamer 2Cat5Egc2Egcg	M	149	118	69	0	C149H118O69S0	3010.572463	[M+H]+	149	119	69	0	C149H119O69S0	3011.579739	[M-H]-	149	117	69	0	C149H117O69S0	3009.565186
619	Proanthocyanidin Polymers	Proanthocyanidin Nonamer	Proanthocyanidin Nonamer 2Ecg5Egc2Egcg	M	163	126	77	0	C163H126O77S0	3314.59438	[M+H]+	163	127	77	0	C163H127O77S0	3315.601656	[M-H]-	163	125	77	0	C163H125O77S0	3313.587103
620	Proanthocyanidin Polymers	Proanthocyanidin Nonamer	Proanthocyanidin Nonamer 2Cat2Ecg5Egcg	M	184	138	87	0	C184H138O87S0	3738.637426	[M+H]+	184	139	87	0	C184H139O87S0	3739.644703	[M-H]-	184	137	87	0	C184H137O87S0	3737.63015
621	Proanthocyanidin Polymers	Proanthocyanidin Nonamer	Proanthocyanidin Nonamer 2Cat2Egc5Egcg	M	170	130	81	0	C170H130O81S0	3466.605338	[M+H]+	170	131	81	0	C170H131O81S0	3467.612615	[M-H]-	170	129	81	0	C170H129O81S0	3465.598062
622	Proanthocyanidin Polymers	Proanthocyanidin Nonamer	Proanthocyanidin Nonamer 2Ecg2Egc5Egcg	M	184	138	89	0	C184H138O89S0	3770.627256	[M+H]+	184	139	89	0	C184H139O89S0	3771.634532	[M-H]-	184	137	89	0	C184H137O89S0	3769.619979
623	Proanthocyanidin Polymers	Proanthocyanidin Nonamer	Proanthocyanidin Nonamer 5Cat2Ecg1Egc1Egcg	M	156	122	68	0	C156H122O68S0	3082.608848	[M+H]+	156	123	68	0	C156H123O68S0	3083.616125	[M-H]-	156	121	68	0	C156H121O68S0	3081.601572
624	Proanthocyanidin Polymers	Proanthocyanidin Nonamer	Proanthocyanidin Nonamer 5Cat1Ecg2Egc1Egcg	M	149	118	65	0	C149H118O65S0	2946.592804	[M+H]+	149	119	65	0	C149H119O65S0	2947.600081	[M-H]-	149	117	65	0	C149H117O65S0	2945.585528
625	Proanthocyanidin Polymers	Proanthocyanidin Nonamer	Proanthocyanidin Nonamer 5Cat1Ecg1Egc2Egcg	M	156	122	69	0	C156H122O69S0	3098.603763	[M+H]+	156	123	69	0	C156H123O69S0	3099.611039	[M-H]-	156	121	69	0	C156H121O69S0	3097.596486
626	Proanthocyanidin Polymers	Proanthocyanidin Nonamer	Proanthocyanidin Nonamer 2Cat5Ecg1Egc1Egcg	M	177	134	80	0	C177H134O80S0	3538.641724	[M+H]+	177	135	80	0	C177H135O80S0	3539.649	[M-H]-	177	133	80	0	C177H133O80S0	3537.634447
627	Proanthocyanidin Polymers	Proanthocyanidin Nonamer	Proanthocyanidin Nonamer 1Cat5Ecg2Egc1Egcg	M	177	134	81	0	C177H134O81S0	3554.636639	[M+H]+	177	135	81	0	C177H135O81S0	3555.643915	[M-H]-	177	133	81	0	C177H133O81S0	3553.629362
628	Proanthocyanidin Polymers	Proanthocyanidin Nonamer	Proanthocyanidin Nonamer 1Cat5Ecg1Egc2Egcg	M	184	138	85	0	C184H138O85S0	3706.647597	[M+H]+	184	139	85	0	C184H139O85S0	3707.654874	[M-H]-	184	137	85	0	C184H137O85S0	3705.640321
629	Proanthocyanidin Polymers	Proanthocyanidin Nonamer	Proanthocyanidin Nonamer 2Cat1Ecg5Egc1Egcg	M	149	118	68	0	C149H118O68S0	2994.577548	[M+H]+	149	119	68	0	C149H119O68S0	2995.584824	[M-H]-	149	117	68	0	C149H117O68S0	2993.570271
630	Proanthocyanidin Polymers	Proanthocyanidin Nonamer	Proanthocyanidin Nonamer 1Cat2Ecg5Egc1Egcg	M	156	122	72	0	C156H122O72S0	3146.588507	[M+H]+	156	123	72	0	C156H123O72S0	3147.595783	[M-H]-	156	121	72	0	C156H121O72S0	3145.58123
631	Proanthocyanidin Polymers	Proanthocyanidin Nonamer	Proanthocyanidin Nonamer 1Cat1Ecg5Egc2Egcg	M	156	122	73	0	C156H122O73S0	3162.583421	[M+H]+	156	123	73	0	C156H123O73S0	3163.590698	[M-H]-	156	121	73	0	C156H121O73S0	3161.576145
632	Proanthocyanidin Polymers	Proanthocyanidin Nonamer	Proanthocyanidin Nonamer 2Cat1Ecg1Egc5Egcg	M	177	134	84	0	C177H134O84S0	3602.621382	[M+H]+	177	135	84	0	C177H135O84S0	3603.628659	[M-H]-	177	133	84	0	C177H133O84S0	3601.614106
633	Proanthocyanidin Polymers	Proanthocyanidin Nonamer	Proanthocyanidin Nonamer 1Cat2Ecg1Egc5Egcg	M	184	138	88	0	C184H138O88S0	3754.632341	[M+H]+	184	139	88	0	C184H139O88S0	3755.639617	[M-H]-	184	137	88	0	C184H137O88S0	3753.625065
634	Proanthocyanidin Polymers	Proanthocyanidin Nonamer	Proanthocyanidin Nonamer 1Cat1Ecg2Egc5Egcg	M	177	134	85	0	C177H134O85S0	3618.616297	[M+H]+	177	135	85	0	C177H135O85S0	3619.623573	[M-H]-	177	133	85	0	C177H133O85S0	3617.609021
635	Proanthocyanidin Polymers	Proanthocyanidin Nonamer	Proanthocyanidin Nonamer 1Ecg4Egc4Egcg	M	170	130	82	0	C170H130O82S0	3482.600253	[M+H]+	170	131	82	0	C170H131O82S0	3483.607529	[M-H]-	170	129	82	0	C170H129O82S0	3481.592977
636	Proanthocyanidin Polymers	Proanthocyanidin Nonamer	Proanthocyanidin Nonamer 4Ecg1Egc4Egcg	M	191	142	91	0	C191H142O91S0	3890.648385	[M+H]+	191	143	91	0	C191H143O91S0	3891.655661	[M-H]-	191	141	91	0	C191H141O91S0	3889.641109
637	Proanthocyanidin Polymers	Proanthocyanidin Nonamer	Proanthocyanidin Nonamer 4Ecg4Egc1Egcg	M	170	130	79	0	C170H130O79S0	3434.615509	[M+H]+	170	131	79	0	C170H131O79S0	3435.622786	[M-H]-	170	129	79	0	C170H129O79S0	3433.608233
638	Proanthocyanidin Polymers	Proanthocyanidin Nonamer	Proanthocyanidin Nonamer 1Cat4Egc4Egcg	M	163	126	78	0	C163H126O78S0	3330.589294	[M+H]+	163	127	78	0	C163H127O78S0	3331.596571	[M-H]-	163	125	78	0	C163H125O78S0	3329.582018
639	Proanthocyanidin Polymers	Proanthocyanidin Nonamer	Proanthocyanidin Nonamer 4Cat1Egc4Egcg	M	163	126	75	0	C163H126O75S0	3282.604551	[M+H]+	163	127	75	0	C163H127O75S0	3283.611827	[M-H]-	163	125	75	0	C163H125O75S0	3281.597274
640	Proanthocyanidin Polymers	Proanthocyanidin Nonamer	Proanthocyanidin Nonamer 4Cat4Egc1Egcg	M	142	114	63	0	C142H114O63S0	2826.571675	[M+H]+	142	115	63	0	C142H115O63S0	2827.578951	[M-H]-	142	113	63	0	C142H113O63S0	2825.564398
641	Proanthocyanidin Polymers	Proanthocyanidin Nonamer	Proanthocyanidin Nonamer 1Cat4Ecg4Egcg	M	191	142	90	0	C191H142O90S0	3874.65347	[M+H]+	191	143	90	0	C191H143O90S0	3875.660747	[M-H]-	191	141	90	0	C191H141O90S0	3873.646194
642	Proanthocyanidin Polymers	Proanthocyanidin Nonamer	Proanthocyanidin Nonamer 4Cat1Ecg4Egcg	M	170	130	78	0	C170H130O78S0	3418.620595	[M+H]+	170	131	78	0	C170H131O78S0	3419.627871	[M-H]-	170	129	78	0	C170H129O78S0	3417.613318
643	Proanthocyanidin Polymers	Proanthocyanidin Nonamer	Proanthocyanidin Nonamer 4Cat4Ecg1Egcg	M	170	130	75	0	C170H130O75S0	3370.635851	[M+H]+	170	131	75	0	C170H131O75S0	3371.643127	[M-H]-	170	129	75	0	C170H129O75S0	3369.628574
644	Proanthocyanidin Polymers	Proanthocyanidin Nonamer	Proanthocyanidin Nonamer 1Cat4Ecg4Egc	M	163	126	74	0	C163H126O74S0	3266.609636	[M+H]+	163	127	74	0	C163H127O74S0	3267.616912	[M-H]-	163	125	74	0	C163H125O74S0	3265.602359
645	Proanthocyanidin Polymers	Proanthocyanidin Nonamer	Proanthocyanidin Nonamer 4Cat1Ecg4Egc	M	142	114	62	0	C142H114O62S0	2810.57676	[M+H]+	142	115	62	0	C142H115O62S0	2811.584037	[M-H]-	142	113	62	0	C142H113O62S0	2809.569484
646	Proanthocyanidin Polymers	Proanthocyanidin Nonamer	Proanthocyanidin Nonamer 4Cat4Ecg1Egc	M	163	126	71	0	C163H126O71S0	3218.624892	[M+H]+	163	127	71	0	C163H127O71S0	3219.632169	[M-H]-	163	125	71	0	C163H125O71S0	3217.617616
647	Proanthocyanidin Polymers	Proanthocyanidin Nonamer	Proanthocyanidin Nonamer 4Cat3Ecg2Egc	M	156	122	68	0	C156H122O68S0	3082.608848	[M+H]+	156	123	68	0	C156H123O68S0	3083.616125	[M-H]-	156	121	68	0	C156H121O68S0	3081.601572
648	Proanthocyanidin Polymers	Proanthocyanidin Nonamer	Proanthocyanidin Nonamer 4Cat3Ecg2Egcg	M	170	130	76	0	C170H130O76S0	3386.630765	[M+H]+	170	131	76	0	C170H131O76S0	3387.638042	[M-H]-	170	129	76	0	C170H129O76S0	3385.623489
649	Proanthocyanidin Polymers	Proanthocyanidin Nonamer	Proanthocyanidin Nonamer 4Cat2Ecg3Egc	M	149	118	65	0	C149H118O65S0	2946.592804	[M+H]+	149	119	65	0	C149H119O65S0	2947.600081	[M-H]-	149	117	65	0	C149H117O65S0	2945.585528
650	Proanthocyanidin Polymers	Proanthocyanidin Nonamer	Proanthocyanidin Nonamer 4Cat2Ecg3Egcg	M	170	130	77	0	C170H130O77S0	3402.62568	[M+H]+	170	131	77	0	C170H131O77S0	3403.632956	[M-H]-	170	129	77	0	C170H129O77S0	3401.618403
651	Proanthocyanidin Polymers	Proanthocyanidin Nonamer	Proanthocyanidin Nonamer 4Cat2Egc3Egcg	M	156	122	71	0	C156H122O71S0	3130.593592	[M+H]+	156	123	71	0	C156H123O71S0	3131.600868	[M-H]-	156	121	71	0	C156H121O71S0	3129.586315
652	Proanthocyanidin Polymers	Proanthocyanidin Nonamer	Proanthocyanidin Nonamer 4Cat3Egc2Egcg	M	149	118	67	0	C149H118O67S0	2978.582633	[M+H]+	149	119	67	0	C149H119O67S0	2979.58991	[M-H]-	149	117	67	0	C149H117O67S0	2977.575357
653	Proanthocyanidin Polymers	Proanthocyanidin Nonamer	Proanthocyanidin Nonamer 3Cat4Ecg2Egc	M	163	126	72	0	C163H126O72S0	3234.619807	[M+H]+	163	127	72	0	C163H127O72S0	3235.627083	[M-H]-	163	125	72	0	C163H125O72S0	3233.61253
654	Proanthocyanidin Polymers	Proanthocyanidin Nonamer	Proanthocyanidin Nonamer 3Cat4Ecg2Egcg	M	177	134	80	0	C177H134O80S0	3538.641724	[M+H]+	177	135	80	0	C177H135O80S0	3539.649	[M-H]-	177	133	80	0	C177H133O80S0	3537.634447
655	Proanthocyanidin Polymers	Proanthocyanidin Nonamer	Proanthocyanidin Nonamer 2Cat4Ecg3Egc	M	163	126	73	0	C163H126O73S0	3250.614721	[M+H]+	163	127	73	0	C163H127O73S0	3251.621998	[M-H]-	163	125	73	0	C163H125O73S0	3249.607445
656	Proanthocyanidin Polymers	Proanthocyanidin Nonamer	Proanthocyanidin Nonamer 2Cat4Ecg3Egcg	M	184	138	85	0	C184H138O85S0	3706.647597	[M+H]+	184	139	85	0	C184H139O85S0	3707.654874	[M-H]-	184	137	85	0	C184H137O85S0	3705.640321
657	Proanthocyanidin Polymers	Proanthocyanidin Nonamer	Proanthocyanidin Nonamer 4Ecg2Egc3Egcg	M	184	138	87	0	C184H138O87S0	3738.637426	[M+H]+	184	139	87	0	C184H139O87S0	3739.644703	[M-H]-	184	137	87	0	C184H137O87S0	3737.63015
658	Proanthocyanidin Polymers	Proanthocyanidin Nonamer	Proanthocyanidin Nonamer 4Ecg3Egc2Egcg	M	177	134	83	0	C177H134O83S0	3586.626468	[M+H]+	177	135	83	0	C177H135O83S0	3587.633744	[M-H]-	177	133	83	0	C177H133O83S0	3585.619191
659	Proanthocyanidin Polymers	Proanthocyanidin Nonamer	Proanthocyanidin Nonamer 3Cat2Ecg4Egc	M	149	118	66	0	C149H118O66S0	2962.587719	[M+H]+	149	119	66	0	C149H119O66S0	2963.594995	[M-H]-	149	117	66	0	C149H117O66S0	2961.580442
660	Proanthocyanidin Polymers	Proanthocyanidin Nonamer	Proanthocyanidin Nonamer 3Cat4Egc2Egcg	M	149	118	68	0	C149H118O68S0	2994.577548	[M+H]+	149	119	68	0	C149H119O68S0	2995.584824	[M-H]-	149	117	68	0	C149H117O68S0	2993.570271
661	Proanthocyanidin Polymers	Proanthocyanidin Nonamer	Proanthocyanidin Nonamer 2Cat3Ecg4Egc	M	156	122	70	0	C156H122O70S0	3114.598677	[M+H]+	156	123	70	0	C156H123O70S0	3115.605954	[M-H]-	156	121	70	0	C156H121O70S0	3113.591401
662	Proanthocyanidin Polymers	Proanthocyanidin Nonamer	Proanthocyanidin Nonamer 2Cat4Egc3Egcg	M	156	122	73	0	C156H122O73S0	3162.583421	[M+H]+	156	123	73	0	C156H123O73S0	3163.590698	[M-H]-	156	121	73	0	C156H121O73S0	3161.576145
663	Proanthocyanidin Polymers	Proanthocyanidin Nonamer	Proanthocyanidin Nonamer 2Ecg4Egc3Egcg	M	170	130	81	0	C170H130O81S0	3466.605338	[M+H]+	170	131	81	0	C170H131O81S0	3467.612615	[M-H]-	170	129	81	0	C170H129O81S0	3465.598062
664	Proanthocyanidin Polymers	Proanthocyanidin Nonamer	Proanthocyanidin Nonamer 3Ecg4Egc2Egcg	M	170	130	80	0	C170H130O80S0	3450.610424	[M+H]+	170	131	80	0	C170H131O80S0	3451.6177	[M-H]-	170	129	80	0	C170H129O80S0	3449.603147
665	Proanthocyanidin Polymers	Proanthocyanidin Nonamer	Proanthocyanidin Nonamer 3Cat2Ecg4Egcg	M	177	134	82	0	C177H134O82S0	3570.631553	[M+H]+	177	135	82	0	C177H135O82S0	3571.63883	[M-H]-	177	133	82	0	C177H133O82S0	3569.624277
666	Proanthocyanidin Polymers	Proanthocyanidin Nonamer	Proanthocyanidin Nonamer 3Cat2Egc4Egcg	M	163	126	76	0	C163H126O76S0	3298.599465	[M+H]+	163	127	76	0	C163H127O76S0	3299.606742	[M-H]-	163	125	76	0	C163H125O76S0	3297.592189
667	Proanthocyanidin Polymers	Proanthocyanidin Nonamer	Proanthocyanidin Nonamer 2Cat3Ecg4Egcg	M	184	138	86	0	C184H138O86S0	3722.642512	[M+H]+	184	139	86	0	C184H139O86S0	3723.649788	[M-H]-	184	137	86	0	C184H137O86S0	3721.635235
668	Proanthocyanidin Polymers	Proanthocyanidin Nonamer	Proanthocyanidin Nonamer 2Cat3Egc4Egcg	M	163	126	77	0	C163H126O77S0	3314.59438	[M+H]+	163	127	77	0	C163H127O77S0	3315.601656	[M-H]-	163	125	77	0	C163H125O77S0	3313.587103
669	Proanthocyanidin Polymers	Proanthocyanidin Nonamer	Proanthocyanidin Nonamer 2Ecg3Egc4Egcg	M	177	134	85	0	C177H134O85S0	3618.616297	[M+H]+	177	135	85	0	C177H135O85S0	3619.623573	[M-H]-	177	133	85	0	C177H133O85S0	3617.609021
670	Proanthocyanidin Polymers	Proanthocyanidin Nonamer	Proanthocyanidin Nonamer 3Ecg2Egc4Egcg	M	184	138	88	0	C184H138O88S0	3754.632341	[M+H]+	184	139	88	0	C184H139O88S0	3755.639617	[M-H]-	184	137	88	0	C184H137O88S0	3753.625065
671	Proanthocyanidin Polymers	Proanthocyanidin Nonamer	Proanthocyanidin Nonamer 4Cat3Ecg1Egc1Egcg	M	163	126	72	0	C163H126O72S0	3234.619807	[M+H]+	163	127	72	0	C163H127O72S0	3235.627083	[M-H]-	163	125	72	0	C163H125O72S0	3233.61253
672	Proanthocyanidin Polymers	Proanthocyanidin Nonamer	Proanthocyanidin Nonamer 4Cat1Ecg3Egc1Egcg	M	149	118	66	0	C149H118O66S0	2962.587719	[M+H]+	149	119	66	0	C149H119O66S0	2963.594995	[M-H]-	149	117	66	0	C149H117O66S0	2961.580442
673	Proanthocyanidin Polymers	Proanthocyanidin Nonamer	Proanthocyanidin Nonamer 4Cat1Ecg1Egc3Egcg	M	163	126	74	0	C163H126O74S0	3266.609636	[M+H]+	163	127	74	0	C163H127O74S0	3267.616912	[M-H]-	163	125	74	0	C163H125O74S0	3265.602359
674	Proanthocyanidin Polymers	Proanthocyanidin Nonamer	Proanthocyanidin Nonamer 3Cat4Ecg1Egc1Egcg	M	170	130	76	0	C170H130O76S0	3386.630765	[M+H]+	170	131	76	0	C170H131O76S0	3387.638042	[M-H]-	170	129	76	0	C170H129O76S0	3385.623489
675	Proanthocyanidin Polymers	Proanthocyanidin Nonamer	Proanthocyanidin Nonamer 1Cat4Ecg3Egc1Egcg	M	170	130	78	0	C170H130O78S0	3418.620595	[M+H]+	170	131	78	0	C170H131O78S0	3419.627871	[M-H]-	170	129	78	0	C170H129O78S0	3417.613318
676	Proanthocyanidin Polymers	Proanthocyanidin Nonamer	Proanthocyanidin Nonamer 1Cat4Ecg1Egc3Egcg	M	184	138	86	0	C184H138O86S0	3722.642512	[M+H]+	184	139	86	0	C184H139O86S0	3723.649788	[M-H]-	184	137	86	0	C184H137O86S0	3721.635235
677	Proanthocyanidin Polymers	Proanthocyanidin Nonamer	Proanthocyanidin Nonamer 3Cat1Ecg4Egc1Egcg	M	149	118	67	0	C149H118O67S0	2978.582633	[M+H]+	149	119	67	0	C149H119O67S0	2979.58991	[M-H]-	149	117	67	0	C149H117O67S0	2977.575357
678	Proanthocyanidin Polymers	Proanthocyanidin Nonamer	Proanthocyanidin Nonamer 1Cat3Ecg4Egc1Egcg	M	163	126	75	0	C163H126O75S0	3282.604551	[M+H]+	163	127	75	0	C163H127O75S0	3283.611827	[M-H]-	163	125	75	0	C163H125O75S0	3281.597274
679	Proanthocyanidin Polymers	Proanthocyanidin Nonamer	Proanthocyanidin Nonamer 1Cat1Ecg4Egc3Egcg	M	163	126	77	0	C163H126O77S0	3314.59438	[M+H]+	163	127	77	0	C163H127O77S0	3315.601656	[M-H]-	163	125	77	0	C163H125O77S0	3313.587103
680	Proanthocyanidin Polymers	Proanthocyanidin Nonamer	Proanthocyanidin Nonamer 3Cat1Ecg1Egc4Egcg	M	170	130	79	0	C170H130O79S0	3434.615509	[M+H]+	170	131	79	0	C170H131O79S0	3435.622786	[M-H]-	170	129	79	0	C170H129O79S0	3433.608233
681	Proanthocyanidin Polymers	Proanthocyanidin Nonamer	Proanthocyanidin Nonamer 1Cat3Ecg1Egc4Egcg	M	184	138	87	0	C184H138O87S0	3738.637426	[M+H]+	184	139	87	0	C184H139O87S0	3739.644703	[M-H]-	184	137	87	0	C184H137O87S0	3737.63015
682	Proanthocyanidin Polymers	Proanthocyanidin Nonamer	Proanthocyanidin Nonamer 1Cat1Ecg3Egc4Egcg	M	170	130	81	0	C170H130O81S0	3466.605338	[M+H]+	170	131	81	0	C170H131O81S0	3467.612615	[M-H]-	170	129	81	0	C170H129O81S0	3465.598062
683	Proanthocyanidin Polymers	Proanthocyanidin Nonamer	Proanthocyanidin Nonamer 4Cat1Ecg2Egc2Egcg	M	156	122	70	0	C156H122O70S0	3114.598677	[M+H]+	156	123	70	0	C156H123O70S0	3115.605954	[M-H]-	156	121	70	0	C156H121O70S0	3113.591401
684	Proanthocyanidin Polymers	Proanthocyanidin Nonamer	Proanthocyanidin Nonamer 4Cat2Ecg1Egc2Egcg	M	163	126	73	0	C163H126O73S0	3250.614721	[M+H]+	163	127	73	0	C163H127O73S0	3251.621998	[M-H]-	163	125	73	0	C163H125O73S0	3249.607445
685	Proanthocyanidin Polymers	Proanthocyanidin Nonamer	Proanthocyanidin Nonamer 4Cat2Ecg2Egc1Egcg	M	156	122	69	0	C156H122O69S0	3098.603763	[M+H]+	156	123	69	0	C156H123O69S0	3099.611039	[M-H]-	156	121	69	0	C156H121O69S0	3097.596486
686	Proanthocyanidin Polymers	Proanthocyanidin Nonamer	Proanthocyanidin Nonamer 1Cat4Ecg2Egc2Egcg	M	177	134	82	0	C177H134O82S0	3570.631553	[M+H]+	177	135	82	0	C177H135O82S0	3571.63883	[M-H]-	177	133	82	0	C177H133O82S0	3569.624277
687	Proanthocyanidin Polymers	Proanthocyanidin Nonamer	Proanthocyanidin Nonamer 2Cat4Ecg1Egc2Egcg	M	177	134	81	0	C177H134O81S0	3554.636639	[M+H]+	177	135	81	0	C177H135O81S0	3555.643915	[M-H]-	177	133	81	0	C177H133O81S0	3553.629362
688	Proanthocyanidin Polymers	Proanthocyanidin Nonamer	Proanthocyanidin Nonamer 2Cat4Ecg2Egc1Egcg	M	170	130	77	0	C170H130O77S0	3402.62568	[M+H]+	170	131	77	0	C170H131O77S0	3403.632956	[M-H]-	170	129	77	0	C170H129O77S0	3401.618403
689	Proanthocyanidin Polymers	Proanthocyanidin Nonamer	Proanthocyanidin Nonamer 1Cat2Ecg4Egc2Egcg	M	163	126	76	0	C163H126O76S0	3298.599465	[M+H]+	163	127	76	0	C163H127O76S0	3299.606742	[M-H]-	163	125	76	0	C163H125O76S0	3297.592189
690	Proanthocyanidin Polymers	Proanthocyanidin Nonamer	Proanthocyanidin Nonamer 2Cat1Ecg4Egc2Egcg	M	156	122	72	0	C156H122O72S0	3146.588507	[M+H]+	156	123	72	0	C156H123O72S0	3147.595783	[M-H]-	156	121	72	0	C156H121O72S0	3145.58123
691	Proanthocyanidin Polymers	Proanthocyanidin Nonamer	Proanthocyanidin Nonamer 2Cat2Ecg4Egc1Egcg	M	156	122	71	0	C156H122O71S0	3130.593592	[M+H]+	156	123	71	0	C156H123O71S0	3131.600868	[M-H]-	156	121	71	0	C156H121O71S0	3129.586315
692	Proanthocyanidin Polymers	Proanthocyanidin Nonamer	Proanthocyanidin Nonamer 1Cat2Ecg2Egc4Egcg	M	177	134	84	0	C177H134O84S0	3602.621382	[M+H]+	177	135	84	0	C177H135O84S0	3603.628659	[M-H]-	177	133	84	0	C177H133O84S0	3601.614106
693	Proanthocyanidin Polymers	Proanthocyanidin Nonamer	Proanthocyanidin Nonamer 2Cat1Ecg2Egc4Egcg	M	170	130	80	0	C170H130O80S0	3450.610424	[M+H]+	170	131	80	0	C170H131O80S0	3451.6177	[M-H]-	170	129	80	0	C170H129O80S0	3449.603147
694	Proanthocyanidin Polymers	Proanthocyanidin Nonamer	Proanthocyanidin Nonamer 2Cat2Ecg1Egc4Egcg	M	177	134	83	0	C177H134O83S0	3586.626468	[M+H]+	177	135	83	0	C177H135O83S0	3587.633744	[M-H]-	177	133	83	0	C177H133O83S0	3585.619191
695	Proanthocyanidin Polymers	Proanthocyanidin Nonamer	Proanthocyanidin Nonamer 3Cat3Ecg3Egc	M	156	122	69	0	C156H122O69S0	3098.603763	[M+H]+	156	123	69	0	C156H123O69S0	3099.611039	[M-H]-	156	121	69	0	C156H121O69S0	3097.596486
696	Proanthocyanidin Polymers	Proanthocyanidin Nonamer	Proanthocyanidin Nonamer 3Cat3Ecg3Egcg	M	177	134	81	0	C177H134O81S0	3554.636639	[M+H]+	177	135	81	0	C177H135O81S0	3555.643915	[M-H]-	177	133	81	0	C177H133O81S0	3553.629362
697	Proanthocyanidin Polymers	Proanthocyanidin Nonamer	Proanthocyanidin Nonamer 3Cat3Egc3Egcg	M	156	122	72	0	C156H122O72S0	3146.588507	[M+H]+	156	123	72	0	C156H123O72S0	3147.595783	[M-H]-	156	121	72	0	C156H121O72S0	3145.58123
698	Proanthocyanidin Polymers	Proanthocyanidin Nonamer	Proanthocyanidin Nonamer 3Ecg3Egc3Egcg	M	177	134	84	0	C177H134O84S0	3602.621382	[M+H]+	177	135	84	0	C177H135O84S0	3603.628659	[M-H]-	177	133	84	0	C177H133O84S0	3601.614106
699	Proanthocyanidin Polymers	Proanthocyanidin Nonamer	Proanthocyanidin Nonamer 1Cat2Ecg3Egc3Egcg	M	170	130	80	0	C170H130O80S0	3450.610424	[M+H]+	170	131	80	0	C170H131O80S0	3451.6177	[M-H]-	170	129	80	0	C170H129O80S0	3449.603147
700	Proanthocyanidin Polymers	Proanthocyanidin Nonamer	Proanthocyanidin Nonamer 1Cat3Ecg2Egc3Egcg	M	177	134	83	0	C177H134O83S0	3586.626468	[M+H]+	177	135	83	0	C177H135O83S0	3587.633744	[M-H]-	177	133	83	0	C177H133O83S0	3585.619191
701	Proanthocyanidin Polymers	Proanthocyanidin Nonamer	Proanthocyanidin Nonamer 1Cat3Ecg3Egc2Egcg	M	170	130	79	0	C170H130O79S0	3434.615509	[M+H]+	170	131	79	0	C170H131O79S0	3435.622786	[M-H]-	170	129	79	0	C170H129O79S0	3433.608233
702	Proanthocyanidin Polymers	Proanthocyanidin Nonamer	Proanthocyanidin Nonamer 2Cat1Ecg3Egc3Egcg	M	163	126	76	0	C163H126O76S0	3298.599465	[M+H]+	163	127	76	0	C163H127O76S0	3299.606742	[M-H]-	163	125	76	0	C163H125O76S0	3297.592189
703	Proanthocyanidin Polymers	Proanthocyanidin Nonamer	Proanthocyanidin Nonamer 3Cat1Ecg2Egc3Egcg	M	163	126	75	0	C163H126O75S0	3282.604551	[M+H]+	163	127	75	0	C163H127O75S0	3283.611827	[M-H]-	163	125	75	0	C163H125O75S0	3281.597274
704	Proanthocyanidin Polymers	Proanthocyanidin Nonamer	Proanthocyanidin Nonamer 3Cat1Ecg3Egc2Egcg	M	156	122	71	0	C156H122O71S0	3130.593592	[M+H]+	156	123	71	0	C156H123O71S0	3131.600868	[M-H]-	156	121	71	0	C156H121O71S0	3129.586315
705	Proanthocyanidin Polymers	Proanthocyanidin Nonamer	Proanthocyanidin Nonamer 2Cat3Ecg1Egc3Egcg	M	177	134	82	0	C177H134O82S0	3570.631553	[M+H]+	177	135	82	0	C177H135O82S0	3571.63883	[M-H]-	177	133	82	0	C177H133O82S0	3569.624277
706	Proanthocyanidin Polymers	Proanthocyanidin Nonamer	Proanthocyanidin Nonamer 3Cat2Ecg1Egc3Egcg	M	170	130	78	0	C170H130O78S0	3418.620595	[M+H]+	170	131	78	0	C170H131O78S0	3419.627871	[M-H]-	170	129	78	0	C170H129O78S0	3417.613318
707	Proanthocyanidin Polymers	Proanthocyanidin Nonamer	Proanthocyanidin Nonamer 3Cat3Ecg1Egc2Egcg	M	170	130	77	0	C170H130O77S0	3402.62568	[M+H]+	170	131	77	0	C170H131O77S0	3403.632956	[M-H]-	170	129	77	0	C170H129O77S0	3401.618403
708	Proanthocyanidin Polymers	Proanthocyanidin Nonamer	Proanthocyanidin Nonamer 2Cat3Ecg3Egc1Egcg	M	163	126	74	0	C163H126O74S0	3266.609636	[M+H]+	163	127	74	0	C163H127O74S0	3267.616912	[M-H]-	163	125	74	0	C163H125O74S0	3265.602359
709	Proanthocyanidin Polymers	Proanthocyanidin Nonamer	Proanthocyanidin Nonamer 3Cat2Ecg3Egc1Egcg	M	156	122	70	0	C156H122O70S0	3114.598677	[M+H]+	156	123	70	0	C156H123O70S0	3115.605954	[M-H]-	156	121	70	0	C156H121O70S0	3113.591401
710	Proanthocyanidin Polymers	Proanthocyanidin Nonamer	Proanthocyanidin Nonamer 3Cat3Ecg2Egc1Egcg	M	163	126	73	0	C163H126O73S0	3250.614721	[M+H]+	163	127	73	0	C163H127O73S0	3251.621998	[M-H]-	163	125	73	0	C163H125O73S0	3249.607445
711	Proanthocyanidin Polymers	Proanthocyanidin Nonamer	Proanthocyanidin Nonamer 3Cat2Ecg2Egc2Egcg	M	163	126	74	0	C163H126O74S0	3266.609636	[M+H]+	163	127	74	0	C163H127O74S0	3267.616912	[M-H]-	163	125	74	0	C163H125O74S0	3265.602359
712	Proanthocyanidin Polymers	Proanthocyanidin Nonamer	Proanthocyanidin Nonamer 2Cat3Ecg2Egc2Egcg	M	170	130	78	0	C170H130O78S0	3418.620595	[M+H]+	170	131	78	0	C170H131O78S0	3419.627871	[M-H]-	170	129	78	0	C170H129O78S0	3417.613318
713	Proanthocyanidin Polymers	Proanthocyanidin Nonamer	Proanthocyanidin Nonamer 2Cat2Ecg3Egc2Egcg	M	163	126	75	0	C163H126O75S0	3282.604551	[M+H]+	163	127	75	0	C163H127O75S0	3283.611827	[M-H]-	163	125	75	0	C163H125O75S0	3281.597274
714	Proanthocyanidin Polymers	Proanthocyanidin Nonamer	Proanthocyanidin Nonamer 2Cat2Ecg2Egc3Egcg	M	170	130	79	0	C170H130O79S0	3434.615509	[M+H]+	170	131	79	0	C170H131O79S0	3435.622786	[M-H]-	170	129	79	0	C170H129O79S0	3433.608233
715	Proanthocyanidin Polymers	Proanthocyanidin Decamer	Proanthocyanidin Decamer 10Cat	M	150	122	60	0	C150H122O60S0	2882.649531	[M+H]+	150	123	60	0	C150H123O60S0	2883.656808	[M-H]-	150	121	60	0	C150H121O60S0	2881.642255
716	Proanthocyanidin Polymers	Proanthocyanidin Decamer	Proanthocyanidin Decamer 10Ecg	M	220	162	100	0	C220H162O100S0	4402.759117	[M+H]+	220	163	100	0	C220H163O100S0	4403.766394	[M-H]-	220	161	100	0	C220H161O100S0	4401.751841
717	Proanthocyanidin Polymers	Proanthocyanidin Decamer	Proanthocyanidin Decamer 10Egc	M	150	122	70	0	C150H122O70S0	3042.598677	[M+H]+	150	123	70	0	C150H123O70S0	3043.605954	[M-H]-	150	121	70	0	C150H121O70S0	3041.591401
718	Proanthocyanidin Polymers	Proanthocyanidin Decamer	Proanthocyanidin Decamer 10Egcg	M	220	162	110	0	C220H162O110S0	4562.708263	[M+H]+	220	163	110	0	C220H163O110S0	4563.71554	[M-H]-	220	161	110	0	C220H161O110S0	4561.700987
719	Proanthocyanidin Polymers	Proanthocyanidin Decamer	Proanthocyanidin Decamer 9Cat1Ecg	M	157	126	64	0	C157H126O64S0	3034.66049	[M+H]+	157	127	64	0	C157H127O64S0	3035.667766	[M-H]-	157	125	64	0	C157H125O64S0	3033.653213
720	Proanthocyanidin Polymers	Proanthocyanidin Decamer	Proanthocyanidin Decamer 9Cat1Egc	M	150	122	61	0	C150H122O61S0	2898.644446	[M+H]+	150	123	61	0	C150H123O61S0	2899.651722	[M-H]-	150	121	61	0	C150H121O61S0	2897.637169
721	Proanthocyanidin Polymers	Proanthocyanidin Decamer	Proanthocyanidin Decamer 9Cat1Egcg	M	157	126	65	0	C157H126O65S0	3050.655404	[M+H]+	157	127	65	0	C157H127O65S0	3051.662681	[M-H]-	157	125	65	0	C157H125O65S0	3049.648128
722	Proanthocyanidin Polymers	Proanthocyanidin Decamer	Proanthocyanidin Decamer 1Cat9Ecg	M	213	158	96	0	C213H158O96S0	4250.748159	[M+H]+	213	159	96	0	C213H159O96S0	4251.755435	[M-H]-	213	157	96	0	C213H157O96S0	4249.740882
723	Proanthocyanidin Polymers	Proanthocyanidin Decamer	Proanthocyanidin Decamer 9Ecg1Egc	M	213	158	97	0	C213H158O97S0	4266.743073	[M+H]+	213	159	97	0	C213H159O97S0	4267.75035	[M-H]-	213	157	97	0	C213H157O97S0	4265.735797
724	Proanthocyanidin Polymers	Proanthocyanidin Decamer	Proanthocyanidin Decamer 9Ecg1Egcg	M	220	162	101	0	C220H162O101S0	4418.754032	[M+H]+	220	163	101	0	C220H163O101S0	4419.761308	[M-H]-	220	161	101	0	C220H161O101S0	4417.746755
725	Proanthocyanidin Polymers	Proanthocyanidin Decamer	Proanthocyanidin Decamer 1Cat9Egc	M	150	122	69	0	C150H122O69S0	3026.603763	[M+H]+	150	123	69	0	C150H123O69S0	3027.611039	[M-H]-	150	121	69	0	C150H121O69S0	3025.596486
726	Proanthocyanidin Polymers	Proanthocyanidin Decamer	Proanthocyanidin Decamer 1Ecg9Egc	M	157	126	73	0	C157H126O73S0	3178.614721	[M+H]+	157	127	73	0	C157H127O73S0	3179.621998	[M-H]-	157	125	73	0	C157H125O73S0	3177.607445
727	Proanthocyanidin Polymers	Proanthocyanidin Decamer	Proanthocyanidin Decamer 9Egc1Egcg	M	157	126	74	0	C157H126O74S0	3194.609636	[M+H]+	157	127	74	0	C157H127O74S0	3195.616912	[M-H]-	157	125	74	0	C157H125O74S0	3193.602359
728	Proanthocyanidin Polymers	Proanthocyanidin Decamer	Proanthocyanidin Decamer 1Cat9Egcg	M	213	158	105	0	C213H158O105S0	4394.70239	[M+H]+	213	159	105	0	C213H159O105S0	4395.709667	[M-H]-	213	157	105	0	C213H157O105S0	4393.695114
729	Proanthocyanidin Polymers	Proanthocyanidin Decamer	Proanthocyanidin Decamer 1Ecg9Egcg	M	220	162	109	0	C220H162O109S0	4546.713349	[M+H]+	220	163	109	0	C220H163O109S0	4547.720625	[M-H]-	220	161	109	0	C220H161O109S0	4545.706072
730	Proanthocyanidin Polymers	Proanthocyanidin Decamer	Proanthocyanidin Decamer 1Egc9Egcg	M	213	158	106	0	C213H158O106S0	4410.697305	[M+H]+	213	159	106	0	C213H159O106S0	4411.704581	[M-H]-	213	157	106	0	C213H157O106S0	4409.690028
731	Proanthocyanidin Polymers	Proanthocyanidin Decamer	Proanthocyanidin Decamer 8Cat2Ecg	M	164	130	68	0	C164H130O68S0	3186.671448	[M+H]+	164	131	68	0	C164H131O68S0	3187.678725	[M-H]-	164	129	68	0	C164H129O68S0	3185.664172
732	Proanthocyanidin Polymers	Proanthocyanidin Decamer	Proanthocyanidin Decamer 8Cat2Egc	M	150	122	62	0	C150H122O62S0	2914.63936	[M+H]+	150	123	62	0	C150H123O62S0	2915.646637	[M-H]-	150	121	62	0	C150H121O62S0	2913.632084
733	Proanthocyanidin Polymers	Proanthocyanidin Decamer	Proanthocyanidin Decamer 8Cat2Egcg	M	164	130	70	0	C164H130O70S0	3218.661278	[M+H]+	164	131	70	0	C164H131O70S0	3219.668554	[M-H]-	164	129	70	0	C164H129O70S0	3217.654001
734	Proanthocyanidin Polymers	Proanthocyanidin Decamer	Proanthocyanidin Decamer 2Cat8Ecg	M	206	154	92	0	C206H154O92S0	4098.7372	[M+H]+	206	155	92	0	C206H155O92S0	4099.744476	[M-H]-	206	153	92	0	C206H153O92S0	4097.729924
735	Proanthocyanidin Polymers	Proanthocyanidin Decamer	Proanthocyanidin Decamer 8Ecg2Egc	M	206	154	94	0	C206H154O94S0	4130.727029	[M+H]+	206	155	94	0	C206H155O94S0	4131.734306	[M-H]-	206	153	94	0	C206H153O94S0	4129.719753
736	Proanthocyanidin Polymers	Proanthocyanidin Decamer	Proanthocyanidin Decamer 8Ecg2Egcg	M	220	162	102	0	C220H162O102S0	4434.748946	[M+H]+	220	163	102	0	C220H163O102S0	4435.756223	[M-H]-	220	161	102	0	C220H161O102S0	4433.74167
737	Proanthocyanidin Polymers	Proanthocyanidin Decamer	Proanthocyanidin Decamer 2Cat8Egc	M	150	122	68	0	C150H122O68S0	3010.608848	[M+H]+	150	123	68	0	C150H123O68S0	3011.616125	[M-H]-	150	121	68	0	C150H121O68S0	3009.601572
738	Proanthocyanidin Polymers	Proanthocyanidin Decamer	Proanthocyanidin Decamer 2Ecg8Egc	M	164	130	76	0	C164H130O76S0	3314.630765	[M+H]+	164	131	76	0	C164H131O76S0	3315.638042	[M-H]-	164	129	76	0	C164H129O76S0	3313.623489
739	Proanthocyanidin Polymers	Proanthocyanidin Decamer	Proanthocyanidin Decamer 8Egc2Egcg	M	164	130	78	0	C164H130O78S0	3346.620595	[M+H]+	164	131	78	0	C164H131O78S0	3347.627871	[M-H]-	164	129	78	0	C164H129O78S0	3345.613318
740	Proanthocyanidin Polymers	Proanthocyanidin Decamer	Proanthocyanidin Decamer 2Cat8Egcg	M	206	154	100	0	C206H154O100S0	4226.696517	[M+H]+	206	155	100	0	C206H155O100S0	4227.703793	[M-H]-	206	153	100	0	C206H153O100S0	4225.68924
741	Proanthocyanidin Polymers	Proanthocyanidin Decamer	Proanthocyanidin Decamer 2Ecg8Egcg	M	220	162	108	0	C220H162O108S0	4530.718434	[M+H]+	220	163	108	0	C220H163O108S0	4531.725711	[M-H]-	220	161	108	0	C220H161O108S0	4529.711158
742	Proanthocyanidin Polymers	Proanthocyanidin Decamer	Proanthocyanidin Decamer 2Egc8Egcg	M	206	154	102	0	C206H154O102S0	4258.686346	[M+H]+	206	155	102	0	C206H155O102S0	4259.693623	[M-H]-	206	153	102	0	C206H153O102S0	4257.67907
743	Proanthocyanidin Polymers	Proanthocyanidin Decamer	Proanthocyanidin Decamer 8Cat1Ecg1Egc	M	157	126	65	0	C157H126O65S0	3050.655404	[M+H]+	157	127	65	0	C157H127O65S0	3051.662681	[M-H]-	157	125	65	0	C157H125O65S0	3049.648128
744	Proanthocyanidin Polymers	Proanthocyanidin Decamer	Proanthocyanidin Decamer 8Cat1Ecg1Egcg	M	164	130	69	0	C164H130O69S0	3202.666363	[M+H]+	164	131	69	0	C164H131O69S0	3203.673639	[M-H]-	164	129	69	0	C164H129O69S0	3201.659086
745	Proanthocyanidin Polymers	Proanthocyanidin Decamer	Proanthocyanidin Decamer 8Cat1Egc1Egcg	M	157	126	66	0	C157H126O66S0	3066.650319	[M+H]+	157	127	66	0	C157H127O66S0	3067.657595	[M-H]-	157	125	66	0	C157H125O66S0	3065.643043
746	Proanthocyanidin Polymers	Proanthocyanidin Decamer	Proanthocyanidin Decamer 1Cat8Ecg1Egc	M	206	154	93	0	C206H154O93S0	4114.732115	[M+H]+	206	155	93	0	C206H155O93S0	4115.739391	[M-H]-	206	153	93	0	C206H153O93S0	4113.724838
747	Proanthocyanidin Polymers	Proanthocyanidin Decamer	Proanthocyanidin Decamer 1Cat8Ecg1Egcg	M	213	158	97	0	C213H158O97S0	4266.743073	[M+H]+	213	159	97	0	C213H159O97S0	4267.75035	[M-H]-	213	157	97	0	C213H157O97S0	4265.735797
748	Proanthocyanidin Polymers	Proanthocyanidin Decamer	Proanthocyanidin Decamer 8Ecg1Egc1Egcg	M	213	158	98	0	C213H158O98S0	4282.737988	[M+H]+	213	159	98	0	C213H159O98S0	4283.745264	[M-H]-	213	157	98	0	C213H157O98S0	4281.730711
749	Proanthocyanidin Polymers	Proanthocyanidin Decamer	Proanthocyanidin Decamer 1Cat1Ecg8Egc	M	157	126	72	0	C157H126O72S0	3162.619807	[M+H]+	157	127	72	0	C157H127O72S0	3163.627083	[M-H]-	157	125	72	0	C157H125O72S0	3161.61253
750	Proanthocyanidin Polymers	Proanthocyanidin Decamer	Proanthocyanidin Decamer 1Cat8Egc1Egcg	M	157	126	73	0	C157H126O73S0	3178.614721	[M+H]+	157	127	73	0	C157H127O73S0	3179.621998	[M-H]-	157	125	73	0	C157H125O73S0	3177.607445
751	Proanthocyanidin Polymers	Proanthocyanidin Decamer	Proanthocyanidin Decamer 1Ecg8Egc1Egcg	M	164	130	77	0	C164H130O77S0	3330.62568	[M+H]+	164	131	77	0	C164H131O77S0	3331.632956	[M-H]-	164	129	77	0	C164H129O77S0	3329.618403
752	Proanthocyanidin Polymers	Proanthocyanidin Decamer	Proanthocyanidin Decamer 1Cat1Ecg8Egcg	M	213	158	104	0	C213H158O104S0	4378.707476	[M+H]+	213	159	104	0	C213H159O104S0	4379.714752	[M-H]-	213	157	104	0	C213H157O104S0	4377.700199
753	Proanthocyanidin Polymers	Proanthocyanidin Decamer	Proanthocyanidin Decamer 1Cat1Egc8Egcg	M	206	154	101	0	C206H154O101S0	4242.691432	[M+H]+	206	155	101	0	C206H155O101S0	4243.698708	[M-H]-	206	153	101	0	C206H153O101S0	4241.684155
754	Proanthocyanidin Polymers	Proanthocyanidin Decamer	Proanthocyanidin Decamer 1Ecg1Egc8Egcg	M	213	158	105	0	C213H158O105S0	4394.70239	[M+H]+	213	159	105	0	C213H159O105S0	4395.709667	[M-H]-	213	157	105	0	C213H157O105S0	4393.695114
755	Proanthocyanidin Polymers	Proanthocyanidin Decamer	Proanthocyanidin Decamer 7Cat3Ecg	M	171	134	72	0	C171H134O72S0	3338.682407	[M+H]+	171	135	72	0	C171H135O72S0	3339.689683	[M-H]-	171	133	72	0	C171H133O72S0	3337.67513
756	Proanthocyanidin Polymers	Proanthocyanidin Decamer	Proanthocyanidin Decamer 7Cat3Egc	M	150	122	63	0	C150H122O63S0	2930.634275	[M+H]+	150	123	63	0	C150H123O63S0	2931.641551	[M-H]-	150	121	63	0	C150H121O63S0	2929.626999
757	Proanthocyanidin Polymers	Proanthocyanidin Decamer	Proanthocyanidin Decamer 7Cat3Egcg	M	171	134	75	0	C171H134O75S0	3386.667151	[M+H]+	171	135	75	0	C171H135O75S0	3387.674427	[M-H]-	171	133	75	0	C171H133O75S0	3385.659874
758	Proanthocyanidin Polymers	Proanthocyanidin Decamer	Proanthocyanidin Decamer 3Cat7Ecg	M	199	150	88	0	C199H150O88S0	3946.726241	[M+H]+	199	151	88	0	C199H151O88S0	3947.733518	[M-H]-	199	149	88	0	C199H149O88S0	3945.718965
759	Proanthocyanidin Polymers	Proanthocyanidin Decamer	Proanthocyanidin Decamer 7Ecg3Egc	M	199	150	91	0	C199H150O91S0	3994.710985	[M+H]+	199	151	91	0	C199H151O91S0	3995.718262	[M-H]-	199	149	91	0	C199H149O91S0	3993.703709
760	Proanthocyanidin Polymers	Proanthocyanidin Decamer	Proanthocyanidin Decamer 7Ecg3Egcg	M	220	162	103	0	C220H162O103S0	4450.743861	[M+H]+	220	163	103	0	C220H163O103S0	4451.751137	[M-H]-	220	161	103	0	C220H161O103S0	4449.736585
761	Proanthocyanidin Polymers	Proanthocyanidin Decamer	Proanthocyanidin Decamer 3Cat7Egc	M	150	122	67	0	C150H122O67S0	2994.613933	[M+H]+	150	123	67	0	C150H123O67S0	2995.62121	[M-H]-	150	121	67	0	C150H121O67S0	2993.606657
762	Proanthocyanidin Polymers	Proanthocyanidin Decamer	Proanthocyanidin Decamer 3Ecg7Egc	M	171	134	79	0	C171H134O79S0	3450.646809	[M+H]+	171	135	79	0	C171H135O79S0	3451.654086	[M-H]-	171	133	79	0	C171H133O79S0	3449.639533
763	Proanthocyanidin Polymers	Proanthocyanidin Decamer	Proanthocyanidin Decamer 7Egc3Egcg	M	171	134	82	0	C171H134O82S0	3498.631553	[M+H]+	171	135	82	0	C171H135O82S0	3499.63883	[M-H]-	171	133	82	0	C171H133O82S0	3497.624277
764	Proanthocyanidin Polymers	Proanthocyanidin Decamer	Proanthocyanidin Decamer 3Cat7Egcg	M	199	150	95	0	C199H150O95S0	4058.690644	[M+H]+	199	151	95	0	C199H151O95S0	4059.69792	[M-H]-	199	149	95	0	C199H149O95S0	4057.683367
765	Proanthocyanidin Polymers	Proanthocyanidin Decamer	Proanthocyanidin Decamer 3Ecg7Egcg	M	220	162	107	0	C220H162O107S0	4514.72352	[M+H]+	220	163	107	0	C220H163O107S0	4515.730796	[M-H]-	220	161	107	0	C220H161O107S0	4513.716243
766	Proanthocyanidin Polymers	Proanthocyanidin Decamer	Proanthocyanidin Decamer 3Egc7Egcg	M	199	150	98	0	C199H150O98S0	4106.675388	[M+H]+	199	151	98	0	C199H151O98S0	4107.682664	[M-H]-	199	149	98	0	C199H149O98S0	4105.668111
767	Proanthocyanidin Polymers	Proanthocyanidin Decamer	Proanthocyanidin Decamer 7Cat2Ecg1Egc	M	164	130	69	0	C164H130O69S0	3202.666363	[M+H]+	164	131	69	0	C164H131O69S0	3203.673639	[M-H]-	164	129	69	0	C164H129O69S0	3201.659086
768	Proanthocyanidin Polymers	Proanthocyanidin Decamer	Proanthocyanidin Decamer 7Cat2Ecg1Egcg	M	171	134	73	0	C171H134O73S0	3354.677322	[M+H]+	171	135	73	0	C171H135O73S0	3355.684598	[M-H]-	171	133	73	0	C171H133O73S0	3353.670045
769	Proanthocyanidin Polymers	Proanthocyanidin Decamer	Proanthocyanidin Decamer 7Cat1Ecg2Egc	M	157	126	66	0	C157H126O66S0	3066.650319	[M+H]+	157	127	66	0	C157H127O66S0	3067.657595	[M-H]-	157	125	66	0	C157H125O66S0	3065.643043
770	Proanthocyanidin Polymers	Proanthocyanidin Decamer	Proanthocyanidin Decamer 7Cat1Ecg2Egcg	M	171	134	74	0	C171H134O74S0	3370.672236	[M+H]+	171	135	74	0	C171H135O74S0	3371.679513	[M-H]-	171	133	74	0	C171H133O74S0	3369.66496
771	Proanthocyanidin Polymers	Proanthocyanidin Decamer	Proanthocyanidin Decamer 7Cat1Egc2Egcg	M	164	130	71	0	C164H130O71S0	3234.656192	[M+H]+	164	131	71	0	C164H131O71S0	3235.663469	[M-H]-	164	129	71	0	C164H129O71S0	3233.648916
772	Proanthocyanidin Polymers	Proanthocyanidin Decamer	Proanthocyanidin Decamer 7Cat2Egc1Egcg	M	157	126	67	0	C157H126O67S0	3082.645234	[M+H]+	157	127	67	0	C157H127O67S0	3083.65251	[M-H]-	157	125	67	0	C157H125O67S0	3081.637957
773	Proanthocyanidin Polymers	Proanthocyanidin Decamer	Proanthocyanidin Decamer 2Cat7Ecg1Egc	M	199	150	89	0	C199H150O89S0	3962.721156	[M+H]+	199	151	89	0	C199H151O89S0	3963.728432	[M-H]-	199	149	89	0	C199H149O89S0	3961.71388
774	Proanthocyanidin Polymers	Proanthocyanidin Decamer	Proanthocyanidin Decamer 2Cat7Ecg1Egcg	M	206	154	93	0	C206H154O93S0	4114.732115	[M+H]+	206	155	93	0	C206H155O93S0	4115.739391	[M-H]-	206	153	93	0	C206H153O93S0	4113.724838
775	Proanthocyanidin Polymers	Proanthocyanidin Decamer	Proanthocyanidin Decamer 1Cat7Ecg2Egc	M	199	150	90	0	C199H150O90S0	3978.716071	[M+H]+	199	151	90	0	C199H151O90S0	3979.723347	[M-H]-	199	149	90	0	C199H149O90S0	3977.708794
776	Proanthocyanidin Polymers	Proanthocyanidin Decamer	Proanthocyanidin Decamer 1Cat7Ecg2Egcg	M	213	158	98	0	C213H158O98S0	4282.737988	[M+H]+	213	159	98	0	C213H159O98S0	4283.745264	[M-H]-	213	157	98	0	C213H157O98S0	4281.730711
777	Proanthocyanidin Polymers	Proanthocyanidin Decamer	Proanthocyanidin Decamer 7Ecg1Egc2Egcg	M	213	158	99	0	C213H158O99S0	4298.732902	[M+H]+	213	159	99	0	C213H159O99S0	4299.740179	[M-H]-	213	157	99	0	C213H157O99S0	4297.725626
778	Proanthocyanidin Polymers	Proanthocyanidin Decamer	Proanthocyanidin Decamer 7Ecg2Egc1Egcg	M	206	154	95	0	C206H154O95S0	4146.721944	[M+H]+	206	155	95	0	C206H155O95S0	4147.72922	[M-H]-	206	153	95	0	C206H153O95S0	4145.714667
779	Proanthocyanidin Polymers	Proanthocyanidin Decamer	Proanthocyanidin Decamer 2Cat1Ecg7Egc	M	157	126	71	0	C157H126O71S0	3146.624892	[M+H]+	157	127	71	0	C157H127O71S0	3147.632169	[M-H]-	157	125	71	0	C157H125O71S0	3145.617616
780	Proanthocyanidin Polymers	Proanthocyanidin Decamer	Proanthocyanidin Decamer 2Cat7Egc1Egcg	M	157	126	72	0	C157H126O72S0	3162.619807	[M+H]+	157	127	72	0	C157H127O72S0	3163.627083	[M-H]-	157	125	72	0	C157H125O72S0	3161.61253
781	Proanthocyanidin Polymers	Proanthocyanidin Decamer	Proanthocyanidin Decamer 1Cat2Ecg7Egc	M	164	130	75	0	C164H130O75S0	3298.635851	[M+H]+	164	131	75	0	C164H131O75S0	3299.643127	[M-H]-	164	129	75	0	C164H129O75S0	3297.628574
782	Proanthocyanidin Polymers	Proanthocyanidin Decamer	Proanthocyanidin Decamer 1Cat7Egc2Egcg	M	164	130	77	0	C164H130O77S0	3330.62568	[M+H]+	164	131	77	0	C164H131O77S0	3331.632956	[M-H]-	164	129	77	0	C164H129O77S0	3329.618403
783	Proanthocyanidin Polymers	Proanthocyanidin Decamer	Proanthocyanidin Decamer 1Ecg7Egc2Egcg	M	171	134	81	0	C171H134O81S0	3482.636639	[M+H]+	171	135	81	0	C171H135O81S0	3483.643915	[M-H]-	171	133	81	0	C171H133O81S0	3481.629362
784	Proanthocyanidin Polymers	Proanthocyanidin Decamer	Proanthocyanidin Decamer 2Ecg7Egc1Egcg	M	171	134	80	0	C171H134O80S0	3466.641724	[M+H]+	171	135	80	0	C171H135O80S0	3467.649	[M-H]-	171	133	80	0	C171H133O80S0	3465.634447
785	Proanthocyanidin Polymers	Proanthocyanidin Decamer	Proanthocyanidin Decamer 2Cat1Ecg7Egcg	M	206	154	99	0	C206H154O99S0	4210.701602	[M+H]+	206	155	99	0	C206H155O99S0	4211.708879	[M-H]-	206	153	99	0	C206H153O99S0	4209.694326
786	Proanthocyanidin Polymers	Proanthocyanidin Decamer	Proanthocyanidin Decamer 2Cat1Egc7Egcg	M	199	150	96	0	C199H150O96S0	4074.685558	[M+H]+	199	151	96	0	C199H151O96S0	4075.692835	[M-H]-	199	149	96	0	C199H149O96S0	4073.678282
787	Proanthocyanidin Polymers	Proanthocyanidin Decamer	Proanthocyanidin Decamer 1Cat2Ecg7Egcg	M	213	158	103	0	C213H158O103S0	4362.712561	[M+H]+	213	159	103	0	C213H159O103S0	4363.719837	[M-H]-	213	157	103	0	C213H157O103S0	4361.705284
788	Proanthocyanidin Polymers	Proanthocyanidin Decamer	Proanthocyanidin Decamer 1Cat2Egc7Egcg	M	199	150	97	0	C199H150O97S0	4090.680473	[M+H]+	199	151	97	0	C199H151O97S0	4091.687749	[M-H]-	199	149	97	0	C199H149O97S0	4089.673196
789	Proanthocyanidin Polymers	Proanthocyanidin Decamer	Proanthocyanidin Decamer 1Ecg2Egc7Egcg	M	206	154	101	0	C206H154O101S0	4242.691432	[M+H]+	206	155	101	0	C206H155O101S0	4243.698708	[M-H]-	206	153	101	0	C206H153O101S0	4241.684155
790	Proanthocyanidin Polymers	Proanthocyanidin Decamer	Proanthocyanidin Decamer 2Ecg1Egc7Egcg	M	213	158	104	0	C213H158O104S0	4378.707476	[M+H]+	213	159	104	0	C213H159O104S0	4379.714752	[M-H]-	213	157	104	0	C213H157O104S0	4377.700199
791	Proanthocyanidin Polymers	Proanthocyanidin Decamer	Proanthocyanidin Decamer 7Cat1Ecg1Egc1Egcg	M	164	130	70	0	C164H130O70S0	3218.661278	[M+H]+	164	131	70	0	C164H131O70S0	3219.668554	[M-H]-	164	129	70	0	C164H129O70S0	3217.654001
792	Proanthocyanidin Polymers	Proanthocyanidin Decamer	Proanthocyanidin Decamer 1Cat7Ecg1Egc1Egcg	M	206	154	94	0	C206H154O94S0	4130.727029	[M+H]+	206	155	94	0	C206H155O94S0	4131.734306	[M-H]-	206	153	94	0	C206H153O94S0	4129.719753
793	Proanthocyanidin Polymers	Proanthocyanidin Decamer	Proanthocyanidin Decamer 1Cat1Ecg7Egc1Egcg	M	164	130	76	0	C164H130O76S0	3314.630765	[M+H]+	164	131	76	0	C164H131O76S0	3315.638042	[M-H]-	164	129	76	0	C164H129O76S0	3313.623489
794	Proanthocyanidin Polymers	Proanthocyanidin Decamer	Proanthocyanidin Decamer 1Cat1Ecg1Egc7Egcg	M	206	154	100	0	C206H154O100S0	4226.696517	[M+H]+	206	155	100	0	C206H155O100S0	4227.703793	[M-H]-	206	153	100	0	C206H153O100S0	4225.68924
795	Proanthocyanidin Polymers	Proanthocyanidin Decamer	Proanthocyanidin Decamer 6Cat4Ecg	M	178	138	76	0	C178H138O76S0	3490.693366	[M+H]+	178	139	76	0	C178H139O76S0	3491.700642	[M-H]-	178	137	76	0	C178H137O76S0	3489.686089
796	Proanthocyanidin Polymers	Proanthocyanidin Decamer	Proanthocyanidin Decamer 6Cat4Egc	M	150	122	64	0	C150H122O64S0	2946.62919	[M+H]+	150	123	64	0	C150H123O64S0	2947.636466	[M-H]-	150	121	64	0	C150H121O64S0	2945.621913
797	Proanthocyanidin Polymers	Proanthocyanidin Decamer	Proanthocyanidin Decamer 6Cat4Egcg	M	178	138	80	0	C178H138O80S0	3554.673024	[M+H]+	178	139	80	0	C178H139O80S0	3555.6803	[M-H]-	178	137	80	0	C178H137O80S0	3553.665748
798	Proanthocyanidin Polymers	Proanthocyanidin Decamer	Proanthocyanidin Decamer 4Cat6Ecg	M	192	146	84	0	C192H146O84S0	3794.715283	[M+H]+	192	147	84	0	C192H147O84S0	3795.722559	[M-H]-	192	145	84	0	C192H145O84S0	3793.708006
799	Proanthocyanidin Polymers	Proanthocyanidin Decamer	Proanthocyanidin Decamer 6Ecg4Egc	M	192	146	88	0	C192H146O88S0	3858.694941	[M+H]+	192	147	88	0	C192H147O88S0	3859.702218	[M-H]-	192	145	88	0	C192H145O88S0	3857.687665
800	Proanthocyanidin Polymers	Proanthocyanidin Decamer	Proanthocyanidin Decamer 6Ecg4Egcg	M	220	162	104	0	C220H162O104S0	4466.738776	[M+H]+	220	163	104	0	C220H163O104S0	4467.746052	[M-H]-	220	161	104	0	C220H161O104S0	4465.731499
801	Proanthocyanidin Polymers	Proanthocyanidin Decamer	Proanthocyanidin Decamer 4Cat6Egc	M	150	122	66	0	C150H122O66S0	2978.619019	[M+H]+	150	123	66	0	C150H123O66S0	2979.626295	[M-H]-	150	121	66	0	C150H121O66S0	2977.611742
802	Proanthocyanidin Polymers	Proanthocyanidin Decamer	Proanthocyanidin Decamer 4Ecg6Egc	M	178	138	82	0	C178H138O82S0	3586.662853	[M+H]+	178	139	82	0	C178H139O82S0	3587.67013	[M-H]-	178	137	82	0	C178H137O82S0	3585.655577
803	Proanthocyanidin Polymers	Proanthocyanidin Decamer	Proanthocyanidin Decamer 6Egc4Egcg	M	178	138	86	0	C178H138O86S0	3650.642512	[M+H]+	178	139	86	0	C178H139O86S0	3651.649788	[M-H]-	178	137	86	0	C178H137O86S0	3649.635235
804	Proanthocyanidin Polymers	Proanthocyanidin Decamer	Proanthocyanidin Decamer 4Cat6Egcg	M	192	146	90	0	C192H146O90S0	3890.68477	[M+H]+	192	147	90	0	C192H147O90S0	3891.692047	[M-H]-	192	145	90	0	C192H145O90S0	3889.677494
805	Proanthocyanidin Polymers	Proanthocyanidin Decamer	Proanthocyanidin Decamer 4Ecg6Egcg	M	220	162	106	0	C220H162O106S0	4498.728605	[M+H]+	220	163	106	0	C220H163O106S0	4499.735881	[M-H]-	220	161	106	0	C220H161O106S0	4497.721328
806	Proanthocyanidin Polymers	Proanthocyanidin Decamer	Proanthocyanidin Decamer 4Egc6Egcg	M	192	146	94	0	C192H146O94S0	3954.664429	[M+H]+	192	147	94	0	C192H147O94S0	3955.671705	[M-H]-	192	145	94	0	C192H145O94S0	3953.657152
807	Proanthocyanidin Polymers	Proanthocyanidin Decamer	Proanthocyanidin Decamer 6Cat3Ecg1Egc	M	171	134	73	0	C171H134O73S0	3354.677322	[M+H]+	171	135	73	0	C171H135O73S0	3355.684598	[M-H]-	171	133	73	0	C171H133O73S0	3353.670045
808	Proanthocyanidin Polymers	Proanthocyanidin Decamer	Proanthocyanidin Decamer 6Cat3Ecg1Egcg	M	178	138	77	0	C178H138O77S0	3506.68828	[M+H]+	178	139	77	0	C178H139O77S0	3507.695557	[M-H]-	178	137	77	0	C178H137O77S0	3505.681004
809	Proanthocyanidin Polymers	Proanthocyanidin Decamer	Proanthocyanidin Decamer 6Cat1Ecg3Egc	M	157	126	67	0	C157H126O67S0	3082.645234	[M+H]+	157	127	67	0	C157H127O67S0	3083.65251	[M-H]-	157	125	67	0	C157H125O67S0	3081.637957
810	Proanthocyanidin Polymers	Proanthocyanidin Decamer	Proanthocyanidin Decamer 6Cat1Ecg3Egcg	M	178	138	79	0	C178H138O79S0	3538.678109	[M+H]+	178	139	79	0	C178H139O79S0	3539.685386	[M-H]-	178	137	79	0	C178H137O79S0	3537.670833
811	Proanthocyanidin Polymers	Proanthocyanidin Decamer	Proanthocyanidin Decamer 6Cat1Egc3Egcg	M	171	134	76	0	C171H134O76S0	3402.662065	[M+H]+	171	135	76	0	C171H135O76S0	3403.669342	[M-H]-	171	133	76	0	C171H133O76S0	3401.654789
812	Proanthocyanidin Polymers	Proanthocyanidin Decamer	Proanthocyanidin Decamer 6Cat3Egc1Egcg	M	157	126	68	0	C157H126O68S0	3098.640148	[M+H]+	157	127	68	0	C157H127O68S0	3099.647425	[M-H]-	157	125	68	0	C157H125O68S0	3097.632872
813	Proanthocyanidin Polymers	Proanthocyanidin Decamer	Proanthocyanidin Decamer 3Cat6Ecg1Egc	M	192	146	85	0	C192H146O85S0	3810.710197	[M+H]+	192	147	85	0	C192H147O85S0	3811.717474	[M-H]-	192	145	85	0	C192H145O85S0	3809.702921
814	Proanthocyanidin Polymers	Proanthocyanidin Decamer	Proanthocyanidin Decamer 3Cat6Ecg1Egcg	M	199	150	89	0	C199H150O89S0	3962.721156	[M+H]+	199	151	89	0	C199H151O89S0	3963.728432	[M-H]-	199	149	89	0	C199H149O89S0	3961.71388
815	Proanthocyanidin Polymers	Proanthocyanidin Decamer	Proanthocyanidin Decamer 1Cat6Ecg3Egc	M	192	146	87	0	C192H146O87S0	3842.700027	[M+H]+	192	147	87	0	C192H147O87S0	3843.707303	[M-H]-	192	145	87	0	C192H145O87S0	3841.69275
816	Proanthocyanidin Polymers	Proanthocyanidin Decamer	Proanthocyanidin Decamer 1Cat6Ecg3Egcg	M	213	158	99	0	C213H158O99S0	4298.732902	[M+H]+	213	159	99	0	C213H159O99S0	4299.740179	[M-H]-	213	157	99	0	C213H157O99S0	4297.725626
817	Proanthocyanidin Polymers	Proanthocyanidin Decamer	Proanthocyanidin Decamer 6Ecg1Egc3Egcg	M	213	158	100	0	C213H158O100S0	4314.727817	[M+H]+	213	159	100	0	C213H159O100S0	4315.735094	[M-H]-	213	157	100	0	C213H157O100S0	4313.720541
818	Proanthocyanidin Polymers	Proanthocyanidin Decamer	Proanthocyanidin Decamer 6Ecg3Egc1Egcg	M	199	150	92	0	C199H150O92S0	4010.7059	[M+H]+	199	151	92	0	C199H151O92S0	4011.713176	[M-H]-	199	149	92	0	C199H149O92S0	4009.698623
819	Proanthocyanidin Polymers	Proanthocyanidin Decamer	Proanthocyanidin Decamer 3Cat1Ecg6Egc	M	157	126	70	0	C157H126O70S0	3130.629977	[M+H]+	157	127	70	0	C157H127O70S0	3131.637254	[M-H]-	157	125	70	0	C157H125O70S0	3129.622701
820	Proanthocyanidin Polymers	Proanthocyanidin Decamer	Proanthocyanidin Decamer 3Cat6Egc1Egcg	M	157	126	71	0	C157H126O71S0	3146.624892	[M+H]+	157	127	71	0	C157H127O71S0	3147.632169	[M-H]-	157	125	71	0	C157H125O71S0	3145.617616
821	Proanthocyanidin Polymers	Proanthocyanidin Decamer	Proanthocyanidin Decamer 1Cat3Ecg6Egc	M	171	134	78	0	C171H134O78S0	3434.651895	[M+H]+	171	135	78	0	C171H135O78S0	3435.659171	[M-H]-	171	133	78	0	C171H133O78S0	3433.644618
822	Proanthocyanidin Polymers	Proanthocyanidin Decamer	Proanthocyanidin Decamer 1Cat6Egc3Egcg	M	171	134	81	0	C171H134O81S0	3482.636639	[M+H]+	171	135	81	0	C171H135O81S0	3483.643915	[M-H]-	171	133	81	0	C171H133O81S0	3481.629362
823	Proanthocyanidin Polymers	Proanthocyanidin Decamer	Proanthocyanidin Decamer 1Ecg6Egc3Egcg	M	178	138	85	0	C178H138O85S0	3634.647597	[M+H]+	178	139	85	0	C178H139O85S0	3635.654874	[M-H]-	178	137	85	0	C178H137O85S0	3633.640321
824	Proanthocyanidin Polymers	Proanthocyanidin Decamer	Proanthocyanidin Decamer 3Ecg6Egc1Egcg	M	178	138	83	0	C178H138O83S0	3602.657768	[M+H]+	178	139	83	0	C178H139O83S0	3603.665044	[M-H]-	178	137	83	0	C178H137O83S0	3601.650491
825	Proanthocyanidin Polymers	Proanthocyanidin Decamer	Proanthocyanidin Decamer 3Cat1Ecg6Egcg	M	199	150	94	0	C199H150O94S0	4042.695729	[M+H]+	199	151	94	0	C199H151O94S0	4043.703006	[M-H]-	199	149	94	0	C199H149O94S0	4041.688453
826	Proanthocyanidin Polymers	Proanthocyanidin Decamer	Proanthocyanidin Decamer 3Cat1Egc6Egcg	M	192	146	91	0	C192H146O91S0	3906.679685	[M+H]+	192	147	91	0	C192H147O91S0	3907.686962	[M-H]-	192	145	91	0	C192H145O91S0	3905.672409
827	Proanthocyanidin Polymers	Proanthocyanidin Decamer	Proanthocyanidin Decamer 1Cat3Ecg6Egcg	M	213	158	102	0	C213H158O102S0	4346.717646	[M+H]+	213	159	102	0	C213H159O102S0	4347.724923	[M-H]-	213	157	102	0	C213H157O102S0	4345.71037
828	Proanthocyanidin Polymers	Proanthocyanidin Decamer	Proanthocyanidin Decamer 1Cat3Egc6Egcg	M	192	146	93	0	C192H146O93S0	3938.669514	[M+H]+	192	147	93	0	C192H147O93S0	3939.676791	[M-H]-	192	145	93	0	C192H145O93S0	3937.662238
829	Proanthocyanidin Polymers	Proanthocyanidin Decamer	Proanthocyanidin Decamer 1Ecg3Egc6Egcg	M	199	150	97	0	C199H150O97S0	4090.680473	[M+H]+	199	151	97	0	C199H151O97S0	4091.687749	[M-H]-	199	149	97	0	C199H149O97S0	4089.673196
830	Proanthocyanidin Polymers	Proanthocyanidin Decamer	Proanthocyanidin Decamer 3Ecg1Egc6Egcg	M	213	158	103	0	C213H158O103S0	4362.712561	[M+H]+	213	159	103	0	C213H159O103S0	4363.719837	[M-H]-	213	157	103	0	C213H157O103S0	4361.705284
831	Proanthocyanidin Polymers	Proanthocyanidin Decamer	Proanthocyanidin Decamer 6Cat2Ecg2Egc	M	164	130	70	0	C164H130O70S0	3218.661278	[M+H]+	164	131	70	0	C164H131O70S0	3219.668554	[M-H]-	164	129	70	0	C164H129O70S0	3217.654001
832	Proanthocyanidin Polymers	Proanthocyanidin Decamer	Proanthocyanidin Decamer 6Cat2Ecg2Egcg	M	178	138	78	0	C178H138O78S0	3522.683195	[M+H]+	178	139	78	0	C178H139O78S0	3523.690471	[M-H]-	178	137	78	0	C178H137O78S0	3521.675918
833	Proanthocyanidin Polymers	Proanthocyanidin Decamer	Proanthocyanidin Decamer 6Cat2Egc2Egcg	M	164	130	72	0	C164H130O72S0	3250.651107	[M+H]+	164	131	72	0	C164H131O72S0	3251.658383	[M-H]-	164	129	72	0	C164H129O72S0	3249.64383
834	Proanthocyanidin Polymers	Proanthocyanidin Decamer	Proanthocyanidin Decamer 2Cat6Ecg2Egc	M	192	146	86	0	C192H146O86S0	3826.705112	[M+H]+	192	147	86	0	C192H147O86S0	3827.712388	[M-H]-	192	145	86	0	C192H145O86S0	3825.697836
835	Proanthocyanidin Polymers	Proanthocyanidin Decamer	Proanthocyanidin Decamer 2Cat6Ecg2Egcg	M	206	154	94	0	C206H154O94S0	4130.727029	[M+H]+	206	155	94	0	C206H155O94S0	4131.734306	[M-H]-	206	153	94	0	C206H153O94S0	4129.719753
836	Proanthocyanidin Polymers	Proanthocyanidin Decamer	Proanthocyanidin Decamer 6Ecg2Egc2Egcg	M	206	154	96	0	C206H154O96S0	4162.716858	[M+H]+	206	155	96	0	C206H155O96S0	4163.724135	[M-H]-	206	153	96	0	C206H153O96S0	4161.709582
837	Proanthocyanidin Polymers	Proanthocyanidin Decamer	Proanthocyanidin Decamer 2Cat2Ecg6Egc	M	164	130	74	0	C164H130O74S0	3282.640936	[M+H]+	164	131	74	0	C164H131O74S0	3283.648212	[M-H]-	164	129	74	0	C164H129O74S0	3281.63366
838	Proanthocyanidin Polymers	Proanthocyanidin Decamer	Proanthocyanidin Decamer 2Cat6Egc2Egcg	M	164	130	76	0	C164H130O76S0	3314.630765	[M+H]+	164	131	76	0	C164H131O76S0	3315.638042	[M-H]-	164	129	76	0	C164H129O76S0	3313.623489
839	Proanthocyanidin Polymers	Proanthocyanidin Decamer	Proanthocyanidin Decamer 2Ecg6Egc2Egcg	M	178	138	84	0	C178H138O84S0	3618.652682	[M+H]+	178	139	84	0	C178H139O84S0	3619.659959	[M-H]-	178	137	84	0	C178H137O84S0	3617.645406
840	Proanthocyanidin Polymers	Proanthocyanidin Decamer	Proanthocyanidin Decamer 2Cat2Ecg6Egcg	M	206	154	98	0	C206H154O98S0	4194.706688	[M+H]+	206	155	98	0	C206H155O98S0	4195.713964	[M-H]-	206	153	98	0	C206H153O98S0	4193.699411
841	Proanthocyanidin Polymers	Proanthocyanidin Decamer	Proanthocyanidin Decamer 2Cat2Egc6Egcg	M	192	146	92	0	C192H146O92S0	3922.6746	[M+H]+	192	147	92	0	C192H147O92S0	3923.681876	[M-H]-	192	145	92	0	C192H145O92S0	3921.667323
842	Proanthocyanidin Polymers	Proanthocyanidin Decamer	Proanthocyanidin Decamer 2Ecg2Egc6Egcg	M	206	154	100	0	C206H154O100S0	4226.696517	[M+H]+	206	155	100	0	C206H155O100S0	4227.703793	[M-H]-	206	153	100	0	C206H153O100S0	4225.68924
843	Proanthocyanidin Polymers	Proanthocyanidin Decamer	Proanthocyanidin Decamer 6Cat2Ecg1Egc1Egcg	M	171	134	74	0	C171H134O74S0	3370.672236	[M+H]+	171	135	74	0	C171H135O74S0	3371.679513	[M-H]-	171	133	74	0	C171H133O74S0	3369.66496
844	Proanthocyanidin Polymers	Proanthocyanidin Decamer	Proanthocyanidin Decamer 6Cat1Ecg2Egc1Egcg	M	164	130	71	0	C164H130O71S0	3234.656192	[M+H]+	164	131	71	0	C164H131O71S0	3235.663469	[M-H]-	164	129	71	0	C164H129O71S0	3233.648916
845	Proanthocyanidin Polymers	Proanthocyanidin Decamer	Proanthocyanidin Decamer 6Cat1Ecg1Egc2Egcg	M	171	134	75	0	C171H134O75S0	3386.667151	[M+H]+	171	135	75	0	C171H135O75S0	3387.674427	[M-H]-	171	133	75	0	C171H133O75S0	3385.659874
846	Proanthocyanidin Polymers	Proanthocyanidin Decamer	Proanthocyanidin Decamer 2Cat6Ecg1Egc1Egcg	M	199	150	90	0	C199H150O90S0	3978.716071	[M+H]+	199	151	90	0	C199H151O90S0	3979.723347	[M-H]-	199	149	90	0	C199H149O90S0	3977.708794
847	Proanthocyanidin Polymers	Proanthocyanidin Decamer	Proanthocyanidin Decamer 1Cat6Ecg2Egc1Egcg	M	199	150	91	0	C199H150O91S0	3994.710985	[M+H]+	199	151	91	0	C199H151O91S0	3995.718262	[M-H]-	199	149	91	0	C199H149O91S0	3993.703709
848	Proanthocyanidin Polymers	Proanthocyanidin Decamer	Proanthocyanidin Decamer 1Cat6Ecg1Egc2Egcg	M	206	154	95	0	C206H154O95S0	4146.721944	[M+H]+	206	155	95	0	C206H155O95S0	4147.72922	[M-H]-	206	153	95	0	C206H153O95S0	4145.714667
849	Proanthocyanidin Polymers	Proanthocyanidin Decamer	Proanthocyanidin Decamer 2Cat1Ecg6Egc1Egcg	M	164	130	75	0	C164H130O75S0	3298.635851	[M+H]+	164	131	75	0	C164H131O75S0	3299.643127	[M-H]-	164	129	75	0	C164H129O75S0	3297.628574
850	Proanthocyanidin Polymers	Proanthocyanidin Decamer	Proanthocyanidin Decamer 1Cat2Ecg6Egc1Egcg	M	171	134	79	0	C171H134O79S0	3450.646809	[M+H]+	171	135	79	0	C171H135O79S0	3451.654086	[M-H]-	171	133	79	0	C171H133O79S0	3449.639533
851	Proanthocyanidin Polymers	Proanthocyanidin Decamer	Proanthocyanidin Decamer 1Cat1Ecg6Egc2Egcg	M	171	134	80	0	C171H134O80S0	3466.641724	[M+H]+	171	135	80	0	C171H135O80S0	3467.649	[M-H]-	171	133	80	0	C171H133O80S0	3465.634447
852	Proanthocyanidin Polymers	Proanthocyanidin Decamer	Proanthocyanidin Decamer 2Cat1Ecg1Egc6Egcg	M	199	150	95	0	C199H150O95S0	4058.690644	[M+H]+	199	151	95	0	C199H151O95S0	4059.69792	[M-H]-	199	149	95	0	C199H149O95S0	4057.683367
853	Proanthocyanidin Polymers	Proanthocyanidin Decamer	Proanthocyanidin Decamer 1Cat2Ecg1Egc6Egcg	M	206	154	99	0	C206H154O99S0	4210.701602	[M+H]+	206	155	99	0	C206H155O99S0	4211.708879	[M-H]-	206	153	99	0	C206H153O99S0	4209.694326
854	Proanthocyanidin Polymers	Proanthocyanidin Decamer	Proanthocyanidin Decamer 1Cat1Ecg2Egc6Egcg	M	199	150	96	0	C199H150O96S0	4074.685558	[M+H]+	199	151	96	0	C199H151O96S0	4075.692835	[M-H]-	199	149	96	0	C199H149O96S0	4073.678282
855	Proanthocyanidin Polymers	Proanthocyanidin Decamer	Proanthocyanidin Decamer 5Cat5Ecg	M	185	142	80	0	C185H142O80S0	3642.704324	[M+H]+	185	143	80	0	C185H143O80S0	3643.711601	[M-H]-	185	141	80	0	C185H141O80S0	3641.697048
856	Proanthocyanidin Polymers	Proanthocyanidin Decamer	Proanthocyanidin Decamer 5Cat5Egc	M	150	122	65	0	C150H122O65S0	2962.624104	[M+H]+	150	123	65	0	C150H123O65S0	2963.631381	[M-H]-	150	121	65	0	C150H121O65S0	2961.616828
857	Proanthocyanidin Polymers	Proanthocyanidin Decamer	Proanthocyanidin Decamer 5Cat5Egcg	M	185	142	85	0	C185H142O85S0	3722.678897	[M+H]+	185	143	85	0	C185H143O85S0	3723.686174	[M-H]-	185	141	85	0	C185H141O85S0	3721.671621
858	Proanthocyanidin Polymers	Proanthocyanidin Decamer	Proanthocyanidin Decamer 5Ecg5Egc	M	185	142	85	0	C185H142O85S0	3722.678897	[M+H]+	185	143	85	0	C185H143O85S0	3723.686174	[M-H]-	185	141	85	0	C185H141O85S0	3721.671621
859	Proanthocyanidin Polymers	Proanthocyanidin Decamer	Proanthocyanidin Decamer 5Ecg5Egcg	M	220	162	105	0	C220H162O105S0	4482.73369	[M+H]+	220	163	105	0	C220H163O105S0	4483.740967	[M-H]-	220	161	105	0	C220H161O105S0	4481.726414
860	Proanthocyanidin Polymers	Proanthocyanidin Decamer	Proanthocyanidin Decamer 5Egc5Egcg	M	185	142	90	0	C185H142O90S0	3802.65347	[M+H]+	185	143	90	0	C185H143O90S0	3803.660747	[M-H]-	185	141	90	0	C185H141O90S0	3801.646194
861	Proanthocyanidin Polymers	Proanthocyanidin Decamer	Proanthocyanidin Decamer 5Cat4Ecg1Egc	M	178	138	77	0	C178H138O77S0	3506.68828	[M+H]+	178	139	77	0	C178H139O77S0	3507.695557	[M-H]-	178	137	77	0	C178H137O77S0	3505.681004
862	Proanthocyanidin Polymers	Proanthocyanidin Decamer	Proanthocyanidin Decamer 5Cat4Ecg1Egcg	M	185	142	81	0	C185H142O81S0	3658.699239	[M+H]+	185	143	81	0	C185H143O81S0	3659.706515	[M-H]-	185	141	81	0	C185H141O81S0	3657.691962
863	Proanthocyanidin Polymers	Proanthocyanidin Decamer	Proanthocyanidin Decamer 5Cat1Ecg4Egc	M	157	126	68	0	C157H126O68S0	3098.640148	[M+H]+	157	127	68	0	C157H127O68S0	3099.647425	[M-H]-	157	125	68	0	C157H125O68S0	3097.632872
864	Proanthocyanidin Polymers	Proanthocyanidin Decamer	Proanthocyanidin Decamer 5Cat1Ecg4Egcg	M	185	142	84	0	C185H142O84S0	3706.683983	[M+H]+	185	143	84	0	C185H143O84S0	3707.691259	[M-H]-	185	141	84	0	C185H141O84S0	3705.676706
865	Proanthocyanidin Polymers	Proanthocyanidin Decamer	Proanthocyanidin Decamer 5Cat1Egc4Egcg	M	178	138	81	0	C178H138O81S0	3570.667939	[M+H]+	178	139	81	0	C178H139O81S0	3571.675215	[M-H]-	178	137	81	0	C178H137O81S0	3569.660662
866	Proanthocyanidin Polymers	Proanthocyanidin Decamer	Proanthocyanidin Decamer 5Cat4Egc1Egcg	M	157	126	69	0	C157H126O69S0	3114.635063	[M+H]+	157	127	69	0	C157H127O69S0	3115.642339	[M-H]-	157	125	69	0	C157H125O69S0	3113.627786
867	Proanthocyanidin Polymers	Proanthocyanidin Decamer	Proanthocyanidin Decamer 4Cat5Ecg1Egc	M	185	142	81	0	C185H142O81S0	3658.699239	[M+H]+	185	143	81	0	C185H143O81S0	3659.706515	[M-H]-	185	141	81	0	C185H141O81S0	3657.691962
868	Proanthocyanidin Polymers	Proanthocyanidin Decamer	Proanthocyanidin Decamer 4Cat5Ecg1Egcg	M	192	146	85	0	C192H146O85S0	3810.710197	[M+H]+	192	147	85	0	C192H147O85S0	3811.717474	[M-H]-	192	145	85	0	C192H145O85S0	3809.702921
869	Proanthocyanidin Polymers	Proanthocyanidin Decamer	Proanthocyanidin Decamer 1Cat5Ecg4Egc	M	185	142	84	0	C185H142O84S0	3706.683983	[M+H]+	185	143	84	0	C185H143O84S0	3707.691259	[M-H]-	185	141	84	0	C185H141O84S0	3705.676706
870	Proanthocyanidin Polymers	Proanthocyanidin Decamer	Proanthocyanidin Decamer 1Cat5Ecg4Egcg	M	213	158	100	0	C213H158O100S0	4314.727817	[M+H]+	213	159	100	0	C213H159O100S0	4315.735094	[M-H]-	213	157	100	0	C213H157O100S0	4313.720541
871	Proanthocyanidin Polymers	Proanthocyanidin Decamer	Proanthocyanidin Decamer 5Ecg1Egc4Egcg	M	213	158	101	0	C213H158O101S0	4330.722732	[M+H]+	213	159	101	0	C213H159O101S0	4331.730008	[M-H]-	213	157	101	0	C213H157O101S0	4329.715455
872	Proanthocyanidin Polymers	Proanthocyanidin Decamer	Proanthocyanidin Decamer 5Ecg4Egc1Egcg	M	192	146	89	0	C192H146O89S0	3874.689856	[M+H]+	192	147	89	0	C192H147O89S0	3875.697132	[M-H]-	192	145	89	0	C192H145O89S0	3873.682579
873	Proanthocyanidin Polymers	Proanthocyanidin Decamer	Proanthocyanidin Decamer 4Cat1Ecg5Egc	M	157	126	69	0	C157H126O69S0	3114.635063	[M+H]+	157	127	69	0	C157H127O69S0	3115.642339	[M-H]-	157	125	69	0	C157H125O69S0	3113.627786
874	Proanthocyanidin Polymers	Proanthocyanidin Decamer	Proanthocyanidin Decamer 4Cat5Egc1Egcg	M	157	126	70	0	C157H126O70S0	3130.629977	[M+H]+	157	127	70	0	C157H127O70S0	3131.637254	[M-H]-	157	125	70	0	C157H125O70S0	3129.622701
875	Proanthocyanidin Polymers	Proanthocyanidin Decamer	Proanthocyanidin Decamer 1Cat4Ecg5Egc	M	178	138	81	0	C178H138O81S0	3570.667939	[M+H]+	178	139	81	0	C178H139O81S0	3571.675215	[M-H]-	178	137	81	0	C178H137O81S0	3569.660662
876	Proanthocyanidin Polymers	Proanthocyanidin Decamer	Proanthocyanidin Decamer 1Cat5Egc4Egcg	M	178	138	85	0	C178H138O85S0	3634.647597	[M+H]+	178	139	85	0	C178H139O85S0	3635.654874	[M-H]-	178	137	85	0	C178H137O85S0	3633.640321
877	Proanthocyanidin Polymers	Proanthocyanidin Decamer	Proanthocyanidin Decamer 1Ecg5Egc4Egcg	M	185	142	89	0	C185H142O89S0	3786.658556	[M+H]+	185	143	89	0	C185H143O89S0	3787.665832	[M-H]-	185	141	89	0	C185H141O89S0	3785.651279
878	Proanthocyanidin Polymers	Proanthocyanidin Decamer	Proanthocyanidin Decamer 4Ecg5Egc1Egcg	M	185	142	86	0	C185H142O86S0	3738.673812	[M+H]+	185	143	86	0	C185H143O86S0	3739.681088	[M-H]-	185	141	86	0	C185H141O86S0	3737.666535
879	Proanthocyanidin Polymers	Proanthocyanidin Decamer	Proanthocyanidin Decamer 4Cat1Ecg5Egcg	M	192	146	89	0	C192H146O89S0	3874.689856	[M+H]+	192	147	89	0	C192H147O89S0	3875.697132	[M-H]-	192	145	89	0	C192H145O89S0	3873.682579
880	Proanthocyanidin Polymers	Proanthocyanidin Decamer	Proanthocyanidin Decamer 4Cat1Egc5Egcg	M	185	142	86	0	C185H142O86S0	3738.673812	[M+H]+	185	143	86	0	C185H143O86S0	3739.681088	[M-H]-	185	141	86	0	C185H141O86S0	3737.666535
881	Proanthocyanidin Polymers	Proanthocyanidin Decamer	Proanthocyanidin Decamer 1Cat4Ecg5Egcg	M	213	158	101	0	C213H158O101S0	4330.722732	[M+H]+	213	159	101	0	C213H159O101S0	4331.730008	[M-H]-	213	157	101	0	C213H157O101S0	4329.715455
882	Proanthocyanidin Polymers	Proanthocyanidin Decamer	Proanthocyanidin Decamer 1Cat4Egc5Egcg	M	185	142	89	0	C185H142O89S0	3786.658556	[M+H]+	185	143	89	0	C185H143O89S0	3787.665832	[M-H]-	185	141	89	0	C185H141O89S0	3785.651279
883	Proanthocyanidin Polymers	Proanthocyanidin Decamer	Proanthocyanidin Decamer 1Ecg4Egc5Egcg	M	192	146	93	0	C192H146O93S0	3938.669514	[M+H]+	192	147	93	0	C192H147O93S0	3939.676791	[M-H]-	192	145	93	0	C192H145O93S0	3937.662238
884	Proanthocyanidin Polymers	Proanthocyanidin Decamer	Proanthocyanidin Decamer 4Ecg1Egc5Egcg	M	213	158	102	0	C213H158O102S0	4346.717646	[M+H]+	213	159	102	0	C213H159O102S0	4347.724923	[M-H]-	213	157	102	0	C213H157O102S0	4345.71037
885	Proanthocyanidin Polymers	Proanthocyanidin Decamer	Proanthocyanidin Decamer 5Cat3Ecg2Egc	M	171	134	74	0	C171H134O74S0	3370.672236	[M+H]+	171	135	74	0	C171H135O74S0	3371.679513	[M-H]-	171	133	74	0	C171H133O74S0	3369.66496
886	Proanthocyanidin Polymers	Proanthocyanidin Decamer	Proanthocyanidin Decamer 5Cat3Ecg2Egcg	M	185	142	82	0	C185H142O82S0	3674.694153	[M+H]+	185	143	82	0	C185H143O82S0	3675.70143	[M-H]-	185	141	82	0	C185H141O82S0	3673.686877
887	Proanthocyanidin Polymers	Proanthocyanidin Decamer	Proanthocyanidin Decamer 5Cat2Ecg3Egc	M	164	130	71	0	C164H130O71S0	3234.656192	[M+H]+	164	131	71	0	C164H131O71S0	3235.663469	[M-H]-	164	129	71	0	C164H129O71S0	3233.648916
888	Proanthocyanidin Polymers	Proanthocyanidin Decamer	Proanthocyanidin Decamer 5Cat2Ecg3Egcg	M	185	142	83	0	C185H142O83S0	3690.689068	[M+H]+	185	143	83	0	C185H143O83S0	3691.696344	[M-H]-	185	141	83	0	C185H141O83S0	3689.681792
889	Proanthocyanidin Polymers	Proanthocyanidin Decamer	Proanthocyanidin Decamer 5Cat2Egc3Egcg	M	171	134	77	0	C171H134O77S0	3418.65698	[M+H]+	171	135	77	0	C171H135O77S0	3419.664256	[M-H]-	171	133	77	0	C171H133O77S0	3417.649704
890	Proanthocyanidin Polymers	Proanthocyanidin Decamer	Proanthocyanidin Decamer 5Cat3Egc2Egcg	M	164	130	73	0	C164H130O73S0	3266.646021	[M+H]+	164	131	73	0	C164H131O73S0	3267.653298	[M-H]-	164	129	73	0	C164H129O73S0	3265.638745
891	Proanthocyanidin Polymers	Proanthocyanidin Decamer	Proanthocyanidin Decamer 3Cat5Ecg2Egc	M	185	142	82	0	C185H142O82S0	3674.694153	[M+H]+	185	143	82	0	C185H143O82S0	3675.70143	[M-H]-	185	141	82	0	C185H141O82S0	3673.686877
892	Proanthocyanidin Polymers	Proanthocyanidin Decamer	Proanthocyanidin Decamer 3Cat5Ecg2Egcg	M	199	150	90	0	C199H150O90S0	3978.716071	[M+H]+	199	151	90	0	C199H151O90S0	3979.723347	[M-H]-	199	149	90	0	C199H149O90S0	3977.708794
893	Proanthocyanidin Polymers	Proanthocyanidin Decamer	Proanthocyanidin Decamer 2Cat5Ecg3Egc	M	185	142	83	0	C185H142O83S0	3690.689068	[M+H]+	185	143	83	0	C185H143O83S0	3691.696344	[M-H]-	185	141	83	0	C185H141O83S0	3689.681792
894	Proanthocyanidin Polymers	Proanthocyanidin Decamer	Proanthocyanidin Decamer 2Cat5Ecg3Egcg	M	206	154	95	0	C206H154O95S0	4146.721944	[M+H]+	206	155	95	0	C206H155O95S0	4147.72922	[M-H]-	206	153	95	0	C206H153O95S0	4145.714667
895	Proanthocyanidin Polymers	Proanthocyanidin Decamer	Proanthocyanidin Decamer 5Ecg2Egc3Egcg	M	206	154	97	0	C206H154O97S0	4178.711773	[M+H]+	206	155	97	0	C206H155O97S0	4179.71905	[M-H]-	206	153	97	0	C206H153O97S0	4177.704497
896	Proanthocyanidin Polymers	Proanthocyanidin Decamer	Proanthocyanidin Decamer 5Ecg3Egc2Egcg	M	199	150	93	0	C199H150O93S0	4026.700814	[M+H]+	199	151	93	0	C199H151O93S0	4027.708091	[M-H]-	199	149	93	0	C199H149O93S0	4025.693538
897	Proanthocyanidin Polymers	Proanthocyanidin Decamer	Proanthocyanidin Decamer 3Cat2Ecg5Egc	M	164	130	73	0	C164H130O73S0	3266.646021	[M+H]+	164	131	73	0	C164H131O73S0	3267.653298	[M-H]-	164	129	73	0	C164H129O73S0	3265.638745
898	Proanthocyanidin Polymers	Proanthocyanidin Decamer	Proanthocyanidin Decamer 3Cat5Egc2Egcg	M	164	130	75	0	C164H130O75S0	3298.635851	[M+H]+	164	131	75	0	C164H131O75S0	3299.643127	[M-H]-	164	129	75	0	C164H129O75S0	3297.628574
899	Proanthocyanidin Polymers	Proanthocyanidin Decamer	Proanthocyanidin Decamer 2Cat3Ecg5Egc	M	171	134	77	0	C171H134O77S0	3418.65698	[M+H]+	171	135	77	0	C171H135O77S0	3419.664256	[M-H]-	171	133	77	0	C171H133O77S0	3417.649704
900	Proanthocyanidin Polymers	Proanthocyanidin Decamer	Proanthocyanidin Decamer 2Cat5Egc3Egcg	M	171	134	80	0	C171H134O80S0	3466.641724	[M+H]+	171	135	80	0	C171H135O80S0	3467.649	[M-H]-	171	133	80	0	C171H133O80S0	3465.634447
901	Proanthocyanidin Polymers	Proanthocyanidin Decamer	Proanthocyanidin Decamer 2Ecg5Egc3Egcg	M	185	142	88	0	C185H142O88S0	3770.663641	[M+H]+	185	143	88	0	C185H143O88S0	3771.670918	[M-H]-	185	141	88	0	C185H141O88S0	3769.656365
902	Proanthocyanidin Polymers	Proanthocyanidin Decamer	Proanthocyanidin Decamer 3Ecg5Egc2Egcg	M	185	142	87	0	C185H142O87S0	3754.668726	[M+H]+	185	143	87	0	C185H143O87S0	3755.676003	[M-H]-	185	141	87	0	C185H141O87S0	3753.66145
903	Proanthocyanidin Polymers	Proanthocyanidin Decamer	Proanthocyanidin Decamer 3Cat2Ecg5Egcg	M	199	150	93	0	C199H150O93S0	4026.700814	[M+H]+	199	151	93	0	C199H151O93S0	4027.708091	[M-H]-	199	149	93	0	C199H149O93S0	4025.693538
904	Proanthocyanidin Polymers	Proanthocyanidin Decamer	Proanthocyanidin Decamer 3Cat2Egc5Egcg	M	185	142	87	0	C185H142O87S0	3754.668726	[M+H]+	185	143	87	0	C185H143O87S0	3755.676003	[M-H]-	185	141	87	0	C185H141O87S0	3753.66145
905	Proanthocyanidin Polymers	Proanthocyanidin Decamer	Proanthocyanidin Decamer 2Cat3Ecg5Egcg	M	206	154	97	0	C206H154O97S0	4178.711773	[M+H]+	206	155	97	0	C206H155O97S0	4179.71905	[M-H]-	206	153	97	0	C206H153O97S0	4177.704497
906	Proanthocyanidin Polymers	Proanthocyanidin Decamer	Proanthocyanidin Decamer 2Cat3Egc5Egcg	M	185	142	88	0	C185H142O88S0	3770.663641	[M+H]+	185	143	88	0	C185H143O88S0	3771.670918	[M-H]-	185	141	88	0	C185H141O88S0	3769.656365
907	Proanthocyanidin Polymers	Proanthocyanidin Decamer	Proanthocyanidin Decamer 2Ecg3Egc5Egcg	M	199	150	96	0	C199H150O96S0	4074.685558	[M+H]+	199	151	96	0	C199H151O96S0	4075.692835	[M-H]-	199	149	96	0	C199H149O96S0	4073.678282
908	Proanthocyanidin Polymers	Proanthocyanidin Decamer	Proanthocyanidin Decamer 3Ecg2Egc5Egcg	M	206	154	99	0	C206H154O99S0	4210.701602	[M+H]+	206	155	99	0	C206H155O99S0	4211.708879	[M-H]-	206	153	99	0	C206H153O99S0	4209.694326
909	Proanthocyanidin Polymers	Proanthocyanidin Decamer	Proanthocyanidin Decamer 5Cat3Ecg1Egc1Egcg	M	178	138	78	0	C178H138O78S0	3522.683195	[M+H]+	178	139	78	0	C178H139O78S0	3523.690471	[M-H]-	178	137	78	0	C178H137O78S0	3521.675918
910	Proanthocyanidin Polymers	Proanthocyanidin Decamer	Proanthocyanidin Decamer 5Cat1Ecg3Egc1Egcg	M	164	130	72	0	C164H130O72S0	3250.651107	[M+H]+	164	131	72	0	C164H131O72S0	3251.658383	[M-H]-	164	129	72	0	C164H129O72S0	3249.64383
911	Proanthocyanidin Polymers	Proanthocyanidin Decamer	Proanthocyanidin Decamer 5Cat1Ecg1Egc3Egcg	M	178	138	80	0	C178H138O80S0	3554.673024	[M+H]+	178	139	80	0	C178H139O80S0	3555.6803	[M-H]-	178	137	80	0	C178H137O80S0	3553.665748
912	Proanthocyanidin Polymers	Proanthocyanidin Decamer	Proanthocyanidin Decamer 3Cat5Ecg1Egc1Egcg	M	192	146	86	0	C192H146O86S0	3826.705112	[M+H]+	192	147	86	0	C192H147O86S0	3827.712388	[M-H]-	192	145	86	0	C192H145O86S0	3825.697836
913	Proanthocyanidin Polymers	Proanthocyanidin Decamer	Proanthocyanidin Decamer 1Cat5Ecg3Egc1Egcg	M	192	146	88	0	C192H146O88S0	3858.694941	[M+H]+	192	147	88	0	C192H147O88S0	3859.702218	[M-H]-	192	145	88	0	C192H145O88S0	3857.687665
914	Proanthocyanidin Polymers	Proanthocyanidin Decamer	Proanthocyanidin Decamer 1Cat5Ecg1Egc3Egcg	M	206	154	96	0	C206H154O96S0	4162.716858	[M+H]+	206	155	96	0	C206H155O96S0	4163.724135	[M-H]-	206	153	96	0	C206H153O96S0	4161.709582
915	Proanthocyanidin Polymers	Proanthocyanidin Decamer	Proanthocyanidin Decamer 3Cat1Ecg5Egc1Egcg	M	164	130	74	0	C164H130O74S0	3282.640936	[M+H]+	164	131	74	0	C164H131O74S0	3283.648212	[M-H]-	164	129	74	0	C164H129O74S0	3281.63366
916	Proanthocyanidin Polymers	Proanthocyanidin Decamer	Proanthocyanidin Decamer 1Cat3Ecg5Egc1Egcg	M	178	138	82	0	C178H138O82S0	3586.662853	[M+H]+	178	139	82	0	C178H139O82S0	3587.67013	[M-H]-	178	137	82	0	C178H137O82S0	3585.655577
917	Proanthocyanidin Polymers	Proanthocyanidin Decamer	Proanthocyanidin Decamer 1Cat1Ecg5Egc3Egcg	M	178	138	84	0	C178H138O84S0	3618.652682	[M+H]+	178	139	84	0	C178H139O84S0	3619.659959	[M-H]-	178	137	84	0	C178H137O84S0	3617.645406
918	Proanthocyanidin Polymers	Proanthocyanidin Decamer	Proanthocyanidin Decamer 3Cat1Ecg1Egc5Egcg	M	192	146	90	0	C192H146O90S0	3890.68477	[M+H]+	192	147	90	0	C192H147O90S0	3891.692047	[M-H]-	192	145	90	0	C192H145O90S0	3889.677494
919	Proanthocyanidin Polymers	Proanthocyanidin Decamer	Proanthocyanidin Decamer 1Cat3Ecg1Egc5Egcg	M	206	154	98	0	C206H154O98S0	4194.706688	[M+H]+	206	155	98	0	C206H155O98S0	4195.713964	[M-H]-	206	153	98	0	C206H153O98S0	4193.699411
920	Proanthocyanidin Polymers	Proanthocyanidin Decamer	Proanthocyanidin Decamer 1Cat1Ecg3Egc5Egcg	M	192	146	92	0	C192H146O92S0	3922.6746	[M+H]+	192	147	92	0	C192H147O92S0	3923.681876	[M-H]-	192	145	92	0	C192H145O92S0	3921.667323
921	Proanthocyanidin Polymers	Proanthocyanidin Decamer	Proanthocyanidin Decamer 5Cat1Ecg2Egc2Egcg	M	171	134	76	0	C171H134O76S0	3402.662065	[M+H]+	171	135	76	0	C171H135O76S0	3403.669342	[M-H]-	171	133	76	0	C171H133O76S0	3401.654789
922	Proanthocyanidin Polymers	Proanthocyanidin Decamer	Proanthocyanidin Decamer 5Cat2Ecg1Egc2Egcg	M	178	138	79	0	C178H138O79S0	3538.678109	[M+H]+	178	139	79	0	C178H139O79S0	3539.685386	[M-H]-	178	137	79	0	C178H137O79S0	3537.670833
923	Proanthocyanidin Polymers	Proanthocyanidin Decamer	Proanthocyanidin Decamer 5Cat2Ecg2Egc1Egcg	M	171	134	75	0	C171H134O75S0	3386.667151	[M+H]+	171	135	75	0	C171H135O75S0	3387.674427	[M-H]-	171	133	75	0	C171H133O75S0	3385.659874
924	Proanthocyanidin Polymers	Proanthocyanidin Decamer	Proanthocyanidin Decamer 1Cat5Ecg2Egc2Egcg	M	199	150	92	0	C199H150O92S0	4010.7059	[M+H]+	199	151	92	0	C199H151O92S0	4011.713176	[M-H]-	199	149	92	0	C199H149O92S0	4009.698623
925	Proanthocyanidin Polymers	Proanthocyanidin Decamer	Proanthocyanidin Decamer 2Cat5Ecg1Egc2Egcg	M	199	150	91	0	C199H150O91S0	3994.710985	[M+H]+	199	151	91	0	C199H151O91S0	3995.718262	[M-H]-	199	149	91	0	C199H149O91S0	3993.703709
926	Proanthocyanidin Polymers	Proanthocyanidin Decamer	Proanthocyanidin Decamer 2Cat5Ecg2Egc1Egcg	M	192	146	87	0	C192H146O87S0	3842.700027	[M+H]+	192	147	87	0	C192H147O87S0	3843.707303	[M-H]-	192	145	87	0	C192H145O87S0	3841.69275
927	Proanthocyanidin Polymers	Proanthocyanidin Decamer	Proanthocyanidin Decamer 1Cat2Ecg5Egc2Egcg	M	178	138	83	0	C178H138O83S0	3602.657768	[M+H]+	178	139	83	0	C178H139O83S0	3603.665044	[M-H]-	178	137	83	0	C178H137O83S0	3601.650491
928	Proanthocyanidin Polymers	Proanthocyanidin Decamer	Proanthocyanidin Decamer 2Cat1Ecg5Egc2Egcg	M	171	134	79	0	C171H134O79S0	3450.646809	[M+H]+	171	135	79	0	C171H135O79S0	3451.654086	[M-H]-	171	133	79	0	C171H133O79S0	3449.639533
929	Proanthocyanidin Polymers	Proanthocyanidin Decamer	Proanthocyanidin Decamer 2Cat2Ecg5Egc1Egcg	M	171	134	78	0	C171H134O78S0	3434.651895	[M+H]+	171	135	78	0	C171H135O78S0	3435.659171	[M-H]-	171	133	78	0	C171H133O78S0	3433.644618
930	Proanthocyanidin Polymers	Proanthocyanidin Decamer	Proanthocyanidin Decamer 1Cat2Ecg2Egc5Egcg	M	199	150	95	0	C199H150O95S0	4058.690644	[M+H]+	199	151	95	0	C199H151O95S0	4059.69792	[M-H]-	199	149	95	0	C199H149O95S0	4057.683367
931	Proanthocyanidin Polymers	Proanthocyanidin Decamer	Proanthocyanidin Decamer 2Cat1Ecg2Egc5Egcg	M	192	146	91	0	C192H146O91S0	3906.679685	[M+H]+	192	147	91	0	C192H147O91S0	3907.686962	[M-H]-	192	145	91	0	C192H145O91S0	3905.672409
932	Proanthocyanidin Polymers	Proanthocyanidin Decamer	Proanthocyanidin Decamer 2Cat2Ecg1Egc5Egcg	M	199	150	94	0	C199H150O94S0	4042.695729	[M+H]+	199	151	94	0	C199H151O94S0	4043.703006	[M-H]-	199	149	94	0	C199H149O94S0	4041.688453
933	Proanthocyanidin Polymers	Proanthocyanidin Decamer	Proanthocyanidin Decamer 2Ecg4Egc4Egcg	M	192	146	92	0	C192H146O92S0	3922.6746	[M+H]+	192	147	92	0	C192H147O92S0	3923.681876	[M-H]-	192	145	92	0	C192H145O92S0	3921.667323
934	Proanthocyanidin Polymers	Proanthocyanidin Decamer	Proanthocyanidin Decamer 4Ecg2Egc4Egcg	M	206	154	98	0	C206H154O98S0	4194.706688	[M+H]+	206	155	98	0	C206H155O98S0	4195.713964	[M-H]-	206	153	98	0	C206H153O98S0	4193.699411
935	Proanthocyanidin Polymers	Proanthocyanidin Decamer	Proanthocyanidin Decamer 4Ecg4Egc2Egcg	M	192	146	90	0	C192H146O90S0	3890.68477	[M+H]+	192	147	90	0	C192H147O90S0	3891.692047	[M-H]-	192	145	90	0	C192H145O90S0	3889.677494
936	Proanthocyanidin Polymers	Proanthocyanidin Decamer	Proanthocyanidin Decamer 2Cat4Egc4Egcg	M	178	138	84	0	C178H138O84S0	3618.652682	[M+H]+	178	139	84	0	C178H139O84S0	3619.659959	[M-H]-	178	137	84	0	C178H137O84S0	3617.645406
937	Proanthocyanidin Polymers	Proanthocyanidin Decamer	Proanthocyanidin Decamer 4Cat2Egc4Egcg	M	178	138	82	0	C178H138O82S0	3586.662853	[M+H]+	178	139	82	0	C178H139O82S0	3587.67013	[M-H]-	178	137	82	0	C178H137O82S0	3585.655577
938	Proanthocyanidin Polymers	Proanthocyanidin Decamer	Proanthocyanidin Decamer 4Cat4Egc2Egcg	M	164	130	74	0	C164H130O74S0	3282.640936	[M+H]+	164	131	74	0	C164H131O74S0	3283.648212	[M-H]-	164	129	74	0	C164H129O74S0	3281.63366
939	Proanthocyanidin Polymers	Proanthocyanidin Decamer	Proanthocyanidin Decamer 2Cat4Ecg4Egcg	M	206	154	96	0	C206H154O96S0	4162.716858	[M+H]+	206	155	96	0	C206H155O96S0	4163.724135	[M-H]-	206	153	96	0	C206H153O96S0	4161.709582
940	Proanthocyanidin Polymers	Proanthocyanidin Decamer	Proanthocyanidin Decamer 4Cat2Ecg4Egcg	M	192	146	88	0	C192H146O88S0	3858.694941	[M+H]+	192	147	88	0	C192H147O88S0	3859.702218	[M-H]-	192	145	88	0	C192H145O88S0	3857.687665
941	Proanthocyanidin Polymers	Proanthocyanidin Decamer	Proanthocyanidin Decamer 4Cat4Ecg2Egcg	M	192	146	86	0	C192H146O86S0	3826.705112	[M+H]+	192	147	86	0	C192H147O86S0	3827.712388	[M-H]-	192	145	86	0	C192H145O86S0	3825.697836
942	Proanthocyanidin Polymers	Proanthocyanidin Decamer	Proanthocyanidin Decamer 2Cat4Ecg4Egc	M	178	138	80	0	C178H138O80S0	3554.673024	[M+H]+	178	139	80	0	C178H139O80S0	3555.6803	[M-H]-	178	137	80	0	C178H137O80S0	3553.665748
943	Proanthocyanidin Polymers	Proanthocyanidin Decamer	Proanthocyanidin Decamer 4Cat2Ecg4Egc	M	164	130	72	0	C164H130O72S0	3250.651107	[M+H]+	164	131	72	0	C164H131O72S0	3251.658383	[M-H]-	164	129	72	0	C164H129O72S0	3249.64383
944	Proanthocyanidin Polymers	Proanthocyanidin Decamer	Proanthocyanidin Decamer 4Cat4Ecg2Egc	M	178	138	78	0	C178H138O78S0	3522.683195	[M+H]+	178	139	78	0	C178H139O78S0	3523.690471	[M-H]-	178	137	78	0	C178H137O78S0	3521.675918
945	Proanthocyanidin Polymers	Proanthocyanidin Decamer	Proanthocyanidin Decamer 4Cat4Ecg1Egc1Egcg	M	185	142	82	0	C185H142O82S0	3674.694153	[M+H]+	185	143	82	0	C185H143O82S0	3675.70143	[M-H]-	185	141	82	0	C185H141O82S0	3673.686877
946	Proanthocyanidin Polymers	Proanthocyanidin Decamer	Proanthocyanidin Decamer 4Cat1Ecg4Egc1Egcg	M	164	130	73	0	C164H130O73S0	3266.646021	[M+H]+	164	131	73	0	C164H131O73S0	3267.653298	[M-H]-	164	129	73	0	C164H129O73S0	3265.638745
947	Proanthocyanidin Polymers	Proanthocyanidin Decamer	Proanthocyanidin Decamer 4Cat1Ecg1Egc4Egcg	M	185	142	85	0	C185H142O85S0	3722.678897	[M+H]+	185	143	85	0	C185H143O85S0	3723.686174	[M-H]-	185	141	85	0	C185H141O85S0	3721.671621
948	Proanthocyanidin Polymers	Proanthocyanidin Decamer	Proanthocyanidin Decamer 1Cat4Ecg4Egc1Egcg	M	185	142	85	0	C185H142O85S0	3722.678897	[M+H]+	185	143	85	0	C185H143O85S0	3723.686174	[M-H]-	185	141	85	0	C185H141O85S0	3721.671621
949	Proanthocyanidin Polymers	Proanthocyanidin Decamer	Proanthocyanidin Decamer 1Cat4Ecg1Egc4Egcg	M	206	154	97	0	C206H154O97S0	4178.711773	[M+H]+	206	155	97	0	C206H155O97S0	4179.71905	[M-H]-	206	153	97	0	C206H153O97S0	4177.704497
950	Proanthocyanidin Polymers	Proanthocyanidin Decamer	Proanthocyanidin Decamer 1Cat1Ecg4Egc4Egcg	M	185	142	88	0	C185H142O88S0	3770.663641	[M+H]+	185	143	88	0	C185H143O88S0	3771.670918	[M-H]-	185	141	88	0	C185H141O88S0	3769.656365
951	Proanthocyanidin Polymers	Proanthocyanidin Decamer	Proanthocyanidin Decamer 4Cat3Ecg3Egc	M	171	134	75	0	C171H134O75S0	3386.667151	[M+H]+	171	135	75	0	C171H135O75S0	3387.674427	[M-H]-	171	133	75	0	C171H133O75S0	3385.659874
952	Proanthocyanidin Polymers	Proanthocyanidin Decamer	Proanthocyanidin Decamer 4Cat3Ecg3Egcg	M	192	146	87	0	C192H146O87S0	3842.700027	[M+H]+	192	147	87	0	C192H147O87S0	3843.707303	[M-H]-	192	145	87	0	C192H145O87S0	3841.69275
953	Proanthocyanidin Polymers	Proanthocyanidin Decamer	Proanthocyanidin Decamer 4Cat3Egc3Egcg	M	171	134	78	0	C171H134O78S0	3434.651895	[M+H]+	171	135	78	0	C171H135O78S0	3435.659171	[M-H]-	171	133	78	0	C171H133O78S0	3433.644618
954	Proanthocyanidin Polymers	Proanthocyanidin Decamer	Proanthocyanidin Decamer 3Cat4Ecg3Egc	M	178	138	79	0	C178H138O79S0	3538.678109	[M+H]+	178	139	79	0	C178H139O79S0	3539.685386	[M-H]-	178	137	79	0	C178H137O79S0	3537.670833
955	Proanthocyanidin Polymers	Proanthocyanidin Decamer	Proanthocyanidin Decamer 3Cat4Ecg3Egcg	M	199	150	91	0	C199H150O91S0	3994.710985	[M+H]+	199	151	91	0	C199H151O91S0	3995.718262	[M-H]-	199	149	91	0	C199H149O91S0	3993.703709
956	Proanthocyanidin Polymers	Proanthocyanidin Decamer	Proanthocyanidin Decamer 4Ecg3Egc3Egcg	M	199	150	94	0	C199H150O94S0	4042.695729	[M+H]+	199	151	94	0	C199H151O94S0	4043.703006	[M-H]-	199	149	94	0	C199H149O94S0	4041.688453
957	Proanthocyanidin Polymers	Proanthocyanidin Decamer	Proanthocyanidin Decamer 3Cat3Ecg4Egc	M	171	134	76	0	C171H134O76S0	3402.662065	[M+H]+	171	135	76	0	C171H135O76S0	3403.669342	[M-H]-	171	133	76	0	C171H133O76S0	3401.654789
958	Proanthocyanidin Polymers	Proanthocyanidin Decamer	Proanthocyanidin Decamer 3Cat4Egc3Egcg	M	171	134	79	0	C171H134O79S0	3450.646809	[M+H]+	171	135	79	0	C171H135O79S0	3451.654086	[M-H]-	171	133	79	0	C171H133O79S0	3449.639533
959	Proanthocyanidin Polymers	Proanthocyanidin Decamer	Proanthocyanidin Decamer 3Ecg4Egc3Egcg	M	192	146	91	0	C192H146O91S0	3906.679685	[M+H]+	192	147	91	0	C192H147O91S0	3907.686962	[M-H]-	192	145	91	0	C192H145O91S0	3905.672409
960	Proanthocyanidin Polymers	Proanthocyanidin Decamer	Proanthocyanidin Decamer 3Cat3Ecg4Egcg	M	199	150	92	0	C199H150O92S0	4010.7059	[M+H]+	199	151	92	0	C199H151O92S0	4011.713176	[M-H]-	199	149	92	0	C199H149O92S0	4009.698623
961	Proanthocyanidin Polymers	Proanthocyanidin Decamer	Proanthocyanidin Decamer 3Cat3Egc4Egcg	M	178	138	83	0	C178H138O83S0	3602.657768	[M+H]+	178	139	83	0	C178H139O83S0	3603.665044	[M-H]-	178	137	83	0	C178H137O83S0	3601.650491
962	Proanthocyanidin Polymers	Proanthocyanidin Decamer	Proanthocyanidin Decamer 3Ecg3Egc4Egcg	M	199	150	95	0	C199H150O95S0	4058.690644	[M+H]+	199	151	95	0	C199H151O95S0	4059.69792	[M-H]-	199	149	95	0	C199H149O95S0	4057.683367
963	Proanthocyanidin Polymers	Proanthocyanidin Decamer	Proanthocyanidin Decamer 4Cat3Ecg2Egc1Egcg	M	178	138	79	0	C178H138O79S0	3538.678109	[M+H]+	178	139	79	0	C178H139O79S0	3539.685386	[M-H]-	178	137	79	0	C178H137O79S0	3537.670833
964	Proanthocyanidin Polymers	Proanthocyanidin Decamer	Proanthocyanidin Decamer 4Cat3Ecg1Egc2Egcg	M	185	142	83	0	C185H142O83S0	3690.689068	[M+H]+	185	143	83	0	C185H143O83S0	3691.696344	[M-H]-	185	141	83	0	C185H141O83S0	3689.681792
965	Proanthocyanidin Polymers	Proanthocyanidin Decamer	Proanthocyanidin Decamer 4Cat2Ecg3Egc1Egcg	M	171	134	76	0	C171H134O76S0	3402.662065	[M+H]+	171	135	76	0	C171H135O76S0	3403.669342	[M-H]-	171	133	76	0	C171H133O76S0	3401.654789
966	Proanthocyanidin Polymers	Proanthocyanidin Decamer	Proanthocyanidin Decamer 4Cat2Ecg1Egc3Egcg	M	185	142	84	0	C185H142O84S0	3706.683983	[M+H]+	185	143	84	0	C185H143O84S0	3707.691259	[M-H]-	185	141	84	0	C185H141O84S0	3705.676706
967	Proanthocyanidin Polymers	Proanthocyanidin Decamer	Proanthocyanidin Decamer 4Cat1Ecg2Egc3Egcg	M	178	138	81	0	C178H138O81S0	3570.667939	[M+H]+	178	139	81	0	C178H139O81S0	3571.675215	[M-H]-	178	137	81	0	C178H137O81S0	3569.660662
968	Proanthocyanidin Polymers	Proanthocyanidin Decamer	Proanthocyanidin Decamer 4Cat1Ecg3Egc2Egcg	M	171	134	77	0	C171H134O77S0	3418.65698	[M+H]+	171	135	77	0	C171H135O77S0	3419.664256	[M-H]-	171	133	77	0	C171H133O77S0	3417.649704
969	Proanthocyanidin Polymers	Proanthocyanidin Decamer	Proanthocyanidin Decamer 3Cat4Ecg2Egc1Egcg	M	185	142	83	0	C185H142O83S0	3690.689068	[M+H]+	185	143	83	0	C185H143O83S0	3691.696344	[M-H]-	185	141	83	0	C185H141O83S0	3689.681792
970	Proanthocyanidin Polymers	Proanthocyanidin Decamer	Proanthocyanidin Decamer 3Cat4Ecg1Egc2Egcg	M	192	146	87	0	C192H146O87S0	3842.700027	[M+H]+	192	147	87	0	C192H147O87S0	3843.707303	[M-H]-	192	145	87	0	C192H145O87S0	3841.69275
971	Proanthocyanidin Polymers	Proanthocyanidin Decamer	Proanthocyanidin Decamer 2Cat4Ecg3Egc1Egcg	M	185	142	84	0	C185H142O84S0	3706.683983	[M+H]+	185	143	84	0	C185H143O84S0	3707.691259	[M-H]-	185	141	84	0	C185H141O84S0	3705.676706
972	Proanthocyanidin Polymers	Proanthocyanidin Decamer	Proanthocyanidin Decamer 2Cat4Ecg1Egc3Egcg	M	199	150	92	0	C199H150O92S0	4010.7059	[M+H]+	199	151	92	0	C199H151O92S0	4011.713176	[M-H]-	199	149	92	0	C199H149O92S0	4009.698623
973	Proanthocyanidin Polymers	Proanthocyanidin Decamer	Proanthocyanidin Decamer 1Cat4Ecg2Egc3Egcg	M	199	150	93	0	C199H150O93S0	4026.700814	[M+H]+	199	151	93	0	C199H151O93S0	4027.708091	[M-H]-	199	149	93	0	C199H149O93S0	4025.693538
974	Proanthocyanidin Polymers	Proanthocyanidin Decamer	Proanthocyanidin Decamer 1Cat4Ecg3Egc2Egcg	M	192	146	89	0	C192H146O89S0	3874.689856	[M+H]+	192	147	89	0	C192H147O89S0	3875.697132	[M-H]-	192	145	89	0	C192H145O89S0	3873.682579
975	Proanthocyanidin Polymers	Proanthocyanidin Decamer	Proanthocyanidin Decamer 3Cat2Ecg4Egc1Egcg	M	171	134	77	0	C171H134O77S0	3418.65698	[M+H]+	171	135	77	0	C171H135O77S0	3419.664256	[M-H]-	171	133	77	0	C171H133O77S0	3417.649704
976	Proanthocyanidin Polymers	Proanthocyanidin Decamer	Proanthocyanidin Decamer 3Cat1Ecg4Egc2Egcg	M	171	134	78	0	C171H134O78S0	3434.651895	[M+H]+	171	135	78	0	C171H135O78S0	3435.659171	[M-H]-	171	133	78	0	C171H133O78S0	3433.644618
977	Proanthocyanidin Polymers	Proanthocyanidin Decamer	Proanthocyanidin Decamer 2Cat3Ecg4Egc1Egcg	M	178	138	81	0	C178H138O81S0	3570.667939	[M+H]+	178	139	81	0	C178H139O81S0	3571.675215	[M-H]-	178	137	81	0	C178H137O81S0	3569.660662
978	Proanthocyanidin Polymers	Proanthocyanidin Decamer	Proanthocyanidin Decamer 2Cat1Ecg4Egc3Egcg	M	178	138	83	0	C178H138O83S0	3602.657768	[M+H]+	178	139	83	0	C178H139O83S0	3603.665044	[M-H]-	178	137	83	0	C178H137O83S0	3601.650491
979	Proanthocyanidin Polymers	Proanthocyanidin Decamer	Proanthocyanidin Decamer 1Cat2Ecg4Egc3Egcg	M	185	142	87	0	C185H142O87S0	3754.668726	[M+H]+	185	143	87	0	C185H143O87S0	3755.676003	[M-H]-	185	141	87	0	C185H141O87S0	3753.66145
980	Proanthocyanidin Polymers	Proanthocyanidin Decamer	Proanthocyanidin Decamer 1Cat3Ecg4Egc2Egcg	M	185	142	86	0	C185H142O86S0	3738.673812	[M+H]+	185	143	86	0	C185H143O86S0	3739.681088	[M-H]-	185	141	86	0	C185H141O86S0	3737.666535
981	Proanthocyanidin Polymers	Proanthocyanidin Decamer	Proanthocyanidin Decamer 3Cat2Ecg1Egc4Egcg	M	192	146	89	0	C192H146O89S0	3874.689856	[M+H]+	192	147	89	0	C192H147O89S0	3875.697132	[M-H]-	192	145	89	0	C192H145O89S0	3873.682579
982	Proanthocyanidin Polymers	Proanthocyanidin Decamer	Proanthocyanidin Decamer 3Cat1Ecg2Egc4Egcg	M	185	142	86	0	C185H142O86S0	3738.673812	[M+H]+	185	143	86	0	C185H143O86S0	3739.681088	[M-H]-	185	141	86	0	C185H141O86S0	3737.666535
983	Proanthocyanidin Polymers	Proanthocyanidin Decamer	Proanthocyanidin Decamer 2Cat3Ecg1Egc4Egcg	M	199	150	93	0	C199H150O93S0	4026.700814	[M+H]+	199	151	93	0	C199H151O93S0	4027.708091	[M-H]-	199	149	93	0	C199H149O93S0	4025.693538
984	Proanthocyanidin Polymers	Proanthocyanidin Decamer	Proanthocyanidin Decamer 2Cat1Ecg3Egc4Egcg	M	185	142	87	0	C185H142O87S0	3754.668726	[M+H]+	185	143	87	0	C185H143O87S0	3755.676003	[M-H]-	185	141	87	0	C185H141O87S0	3753.66145
985	Proanthocyanidin Polymers	Proanthocyanidin Decamer	Proanthocyanidin Decamer 1Cat2Ecg3Egc4Egcg	M	192	146	91	0	C192H146O91S0	3906.679685	[M+H]+	192	147	91	0	C192H147O91S0	3907.686962	[M-H]-	192	145	91	0	C192H145O91S0	3905.672409
986	Proanthocyanidin Polymers	Proanthocyanidin Decamer	Proanthocyanidin Decamer 1Cat3Ecg2Egc4Egcg	M	199	150	94	0	C199H150O94S0	4042.695729	[M+H]+	199	151	94	0	C199H151O94S0	4043.703006	[M-H]-	199	149	94	0	C199H149O94S0	4041.688453
987	Proanthocyanidin Polymers	Proanthocyanidin Decamer	Proanthocyanidin Decamer 4Cat2Ecg2Egc2Egcg	M	178	138	80	0	C178H138O80S0	3554.673024	[M+H]+	178	139	80	0	C178H139O80S0	3555.6803	[M-H]-	178	137	80	0	C178H137O80S0	3553.665748
988	Proanthocyanidin Polymers	Proanthocyanidin Decamer	Proanthocyanidin Decamer 2Cat4Ecg2Egc2Egcg	M	192	146	88	0	C192H146O88S0	3858.694941	[M+H]+	192	147	88	0	C192H147O88S0	3859.702218	[M-H]-	192	145	88	0	C192H145O88S0	3857.687665
989	Proanthocyanidin Polymers	Proanthocyanidin Decamer	Proanthocyanidin Decamer 2Cat2Ecg4Egc2Egcg	M	178	138	82	0	C178H138O82S0	3586.662853	[M+H]+	178	139	82	0	C178H139O82S0	3587.67013	[M-H]-	178	137	82	0	C178H137O82S0	3585.655577
990	Proanthocyanidin Polymers	Proanthocyanidin Decamer	Proanthocyanidin Decamer 2Cat2Ecg2Egc4Egcg	M	192	146	90	0	C192H146O90S0	3890.68477	[M+H]+	192	147	90	0	C192H147O90S0	3891.692047	[M-H]-	192	145	90	0	C192H145O90S0	3889.677494
991	Proanthocyanidin Polymers	Proanthocyanidin Decamer	Proanthocyanidin Decamer 3Cat3Ecg3Egc1Egcg	M	178	138	80	0	C178H138O80S0	3554.673024	[M+H]+	178	139	80	0	C178H139O80S0	3555.6803	[M-H]-	178	137	80	0	C178H137O80S0	3553.665748
992	Proanthocyanidin Polymers	Proanthocyanidin Decamer	Proanthocyanidin Decamer 3Cat3Ecg1Egc3Egcg	M	192	146	88	0	C192H146O88S0	3858.694941	[M+H]+	192	147	88	0	C192H147O88S0	3859.702218	[M-H]-	192	145	88	0	C192H145O88S0	3857.687665
993	Proanthocyanidin Polymers	Proanthocyanidin Decamer	Proanthocyanidin Decamer 3Cat1Ecg3Egc3Egcg	M	178	138	82	0	C178H138O82S0	3586.662853	[M+H]+	178	139	82	0	C178H139O82S0	3587.67013	[M-H]-	178	137	82	0	C178H137O82S0	3585.655577
994	Proanthocyanidin Polymers	Proanthocyanidin Decamer	Proanthocyanidin Decamer 1Cat3Ecg3Egc3Egcg	M	192	146	90	0	C192H146O90S0	3890.68477	[M+H]+	192	147	90	0	C192H147O90S0	3891.692047	[M-H]-	192	145	90	0	C192H145O90S0	3889.677494
995	Proanthocyanidin Polymers	Proanthocyanidin Decamer	Proanthocyanidin Decamer 3Cat3Ecg2Egc2Egcg	M	185	142	84	0	C185H142O84S0	3706.683983	[M+H]+	185	143	84	0	C185H143O84S0	3707.691259	[M-H]-	185	141	84	0	C185H141O84S0	3705.676706
996	Proanthocyanidin Polymers	Proanthocyanidin Decamer	Proanthocyanidin Decamer 3Cat2Ecg3Egc2Egcg	M	178	138	81	0	C178H138O81S0	3570.667939	[M+H]+	178	139	81	0	C178H139O81S0	3571.675215	[M-H]-	178	137	81	0	C178H137O81S0	3569.660662
997	Proanthocyanidin Polymers	Proanthocyanidin Decamer	Proanthocyanidin Decamer 3Cat2Ecg2Egc3Egcg	M	185	142	85	0	C185H142O85S0	3722.678897	[M+H]+	185	143	85	0	C185H143O85S0	3723.686174	[M-H]-	185	141	85	0	C185H141O85S0	3721.671621
998	Proanthocyanidin Polymers	Proanthocyanidin Decamer	Proanthocyanidin Decamer 2Cat3Ecg3Egc2Egcg	M	185	142	85	0	C185H142O85S0	3722.678897	[M+H]+	185	143	85	0	C185H143O85S0	3723.686174	[M-H]-	185	141	85	0	C185H141O85S0	3721.671621
999	Proanthocyanidin Polymers	Proanthocyanidin Decamer	Proanthocyanidin Decamer 2Cat3Ecg2Egc3Egcg	M	192	146	89	0	C192H146O89S0	3874.689856	[M+H]+	192	147	89	0	C192H147O89S0	3875.697132	[M-H]-	192	145	89	0	C192H145O89S0	3873.682579
1000	Proanthocyanidin Polymers	Proanthocyanidin Decamer	Proanthocyanidin Decamer 2Cat2Ecg3Egc3Egcg	M	185	142	86	0	C185H142O86S0	3738.673812	[M+H]+	185	143	86	0	C185H143O86S0	3739.681088	[M-H]-	185	141	86	0	C185H141O86S0	3737.666535
